# Supplementary material
Source: PubMed Central journal article supplement (PMC7920188)
Supplement: NIHMS1671619-supplement-Supporting_Info.pdf [file NIHMS1671619-supplement-Supporting_Info.pdf]

## Supporting Information

### **Table of Contents:**

|                                                                                                      |     |
|------------------------------------------------------------------------------------------------------|-----|
| Summary of Prior Synthesis of Andrographolide.....                                                   | S2  |
| General Information.....                                                                             | S3  |
| Spectroscopy, Spectrometry, and Data Collection .....                                                | S3  |
| Detailed Procedures and Spectral Data for Asymmetric Synthesis of Andrographolide.....               | S4  |
| Detailed Procedures and Spectral Data for Asymmetric Synthesis of 14-Hydroxy-colladonin .....        | S36 |
| Comparison of NMR Data between Natural and Synthetic Andrographolide and 14-Hydroxy-colladonin ..... | S45 |
| Crystallographic Material for <b>9</b> .....                                                         | S49 |
| References.....                                                                                      | S74 |

## Summary of Prior Synthesis of Andrographolide

Li, W.-D. Z. *et al. Tetrahedron* **2014**, *70*, 9436.

### Fragment 1

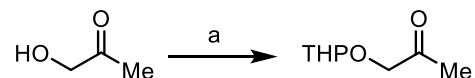

Key: (a) DHP, PPTS

### Completion of Synthesis

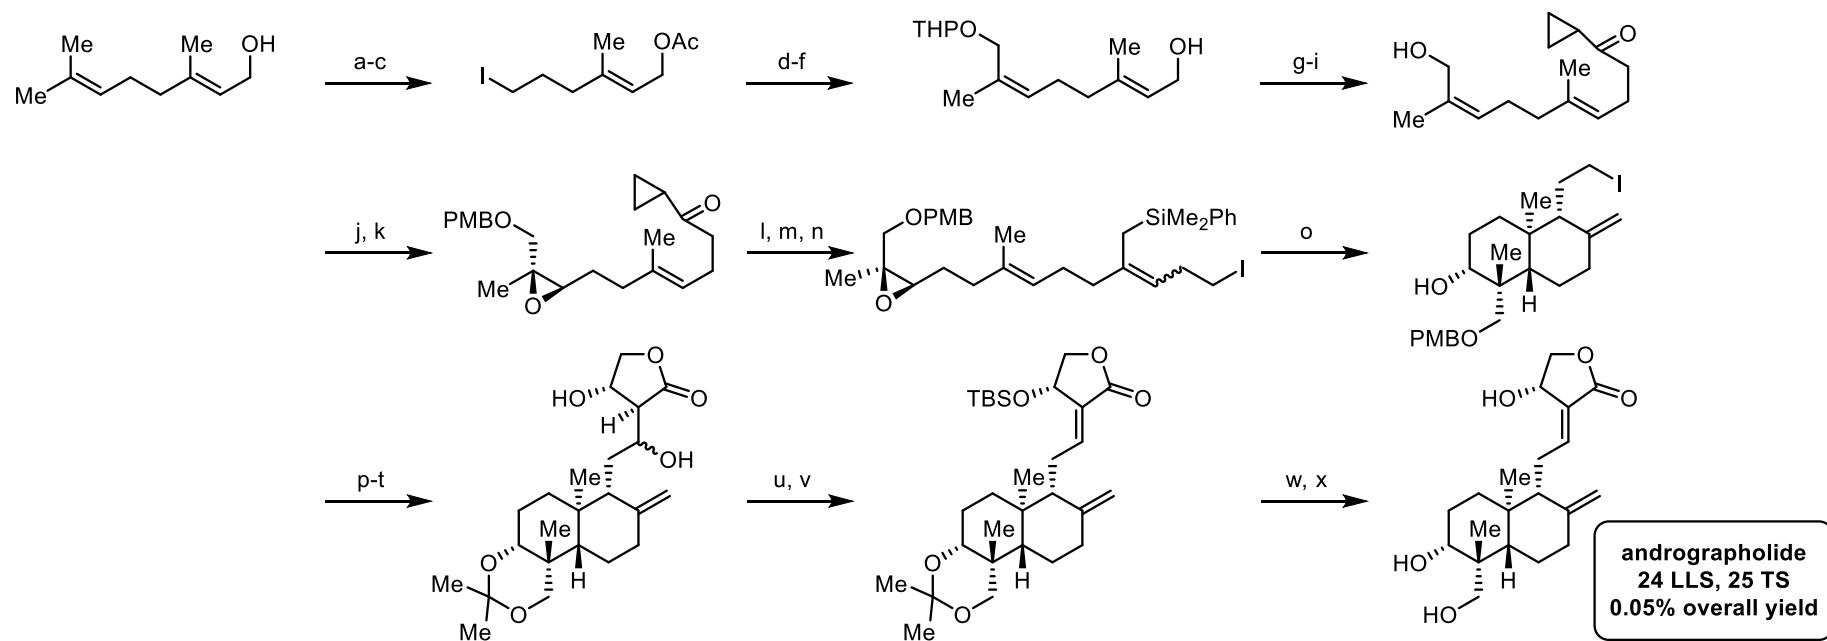

## **General Information**

All reactions were run under an atmosphere of argon, unless otherwise indicated. Resealable pressure tubes (13x100 mm) were purchased from Fisher Scientific (catalog number 14-959-35C) and were flame dried followed by cooling in a desiccator or under a stream of argon prior to use. All commercial reagents and anhydrous solvents were used as received from vendors (Strem Chemicals, Fisher Scientific, Sigma Aldrich and Combi Blocks) without further purification. Preparative column chromatography employing Silicycle silica gel (40-63  $\mu\text{m}$ ) was performed according to the method of Still. Analytical thin layer chromatography (TLC) was carried out using 0.25 mm commercial silica gel plates (Dynamic Absorbents F254). Visualization was accomplished with UV light followed by dipping in CAM, *p*-Anisaldehyde (PAA), or  $\text{KMnO}_4$  stain solution followed by heating. Specific optical rotations were recorded on an Atago AP-300 automatic polarimeter at the sodium line (589.3 nm) in  $\text{CHCl}_3$ . Solution concentrations are given in the units of  $10^{-2} \text{ g mL}^{-1}$ .

## **Spectroscopy, Spectrometry, and Data Collection**

Infrared spectra were recorded on a Perkin-Elmer 1600 spectrometer. High-resolution mass spectra (HRMS) were obtained on a Karatos MS9 and are reported as  $m/z$  (relative intensity). Accurate masses are reported for the molecular ion ( $M+H$ ,  $M+Na$ ), or a suitable fragment ion. Proton nuclear magnetic resonance ( $^1\text{H}$  NMR) spectra were recorded with a Varian INOVA (500 MHz) spectrometer equipped with a Bruker AVANCE III cryoprobe.

Chemical shifts are reported in delta ( $\delta$ ) units, parts per million (ppm) downfield from tetramethylsilane or ppm relative to the center of the singlet at 7.26 ppm for  $\text{CHCl}_3$ . Data reported as multiplicity ( $s$  = singlet,  $d$  = doublet,  $t$  = triplet,  $q$  = quartet,  $m$  = multiplet). Carbon-13 nuclear magnetic resonance ( $^{13}\text{C}$  NMR) spectra were recorded with a Varian INOVA (125 MHz) spectrometer and were routinely run with broadband decoupling. Chemical shifts are reported in delta ( $\delta$ ) units, ppm relative to the center of the triplet at 77.16 ppm for deuteriochloroform.

## Detailed Procedures and Spectral Data for Asymmetric Synthesis of Andrographolide

### (5*R*,6*R*)-5-Hydroxy-6-(hydroxymethyl)-6-methyloct-7-en-2-one (**2**)

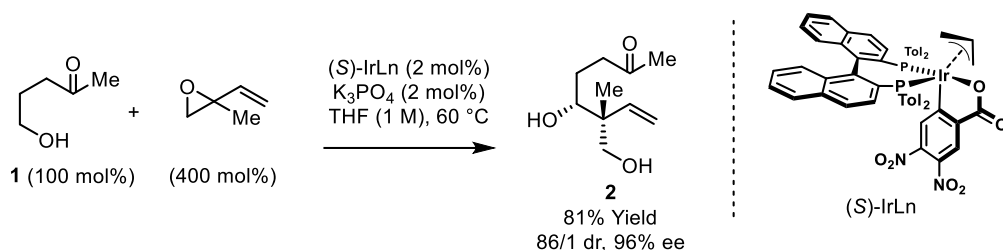

### Detailed Procedures

Catalyst (S)-IrLn<sup>1</sup> (1.00 g, 0.98 mmol, 2 mol%) and K<sub>3</sub>PO<sub>4</sub> (0.21 g, 0.98 mmol, 2 mol%) were added to a flame-dried seal tube and purged with argon. Anhydrous THF (49 mL) was added, followed by 5-hydroxypentan-2-one **1** (5.01 g, 10 mmol, 100 mol%) and isoprene monoxide (19.3 mL, 196 mmol, 400 mol%) via syringe. (**Caution:** K<sub>3</sub>PO<sub>4</sub> is hygroscopic. Please make sure all the base solid is placed at the bottom of reaction vial and submerged by solvent). After sealed with cap, the resulting mixture was allowed to stir at 60 °C for 5 days. The solution was cooled to ambient temperature and concentrated under reduced pressure. The residue was submitted to flash column chromatography on silica gel (pretreated with triethylamine, DCM (CH<sub>2</sub>Cl<sub>2</sub>)/acetone = 10/1 to 5/1). *Cautions: product starts converting to ketal upon gently heating (>30 °C) under neutral or acidic condition!* The title compound **2** was isolated as a brown oil (7.37 g, 39.6 mmol) in 81% yield. *Product exists as an equilibrating mixture between hydroxyl ketone and two diastereomeric lactols (equilibrated ratio 0.5:0.3:0.2).*

**<sup>1</sup>H NMR** (400 MHz, CDCl<sub>3</sub>) δ 6.07\* (dd, *J* = 18.0, 11.3 Hz, 1H (minor2)), 6.00 (dd, *J* = 17.8, 11.1 Hz, 1H, (major)), 5.95\* (dd, *J* = 17.8, 11.0 Hz, 1H, (minor1)), 5.30-5.21 (m, 1H (major, minor1, minor2)), 5.19\* (dd, *J* = 8.7, 1.4 Hz, 1H (minor1)), 5.15\* (dd, *J* = 8.8, 1.4 Hz, 1H (minor2)), 5.14 (dd, *J* = 17.8, 1.4 Hz, 1H (major)), 4.19\* (t, *J* = 6.8 Hz, 1H (minor1)), 4.00\* (dd, *J* = 10.0, 5.8 Hz, 1H (minor2)), 3.69 (d, *J* = 10.9 Hz, 1H (major)), 3.61-3.48 (m, 2H (major, minor1, minor2)), 3.25 (br, 1H (major)), 2.96\* (br, 2H (minor1, minor2)), 2.66 (td, *J* = 6.7, 4.0 Hz, 2H (major)), 2.17 (s, 3H (major)), 2.12-1.90 (m, 1H (major) + 2H (minor1, minor2)), 1.87-1.54 (m, 2H (major, minor1, minor2)), 1.52\* (s, 3H (minor1, minor2)), 1.00 (s, 3H (major)), 0.98\* (s, 3H (minor2)), 0.96\* (s, 3H (minor1)).

The spectral data recorded for the compound was in complete agreement with the literature.<sup>2</sup>

HPLC Diastereomeric ratio and enantiomeric excess was determined by HPLC analysis of the dibenzoate of product (Chiralcel AD-H column, hexanes/*i*-PrOH = 97:3, 0.50 mL/min, 230 nm), *anti:syn* = 86:1, ee = 96%.

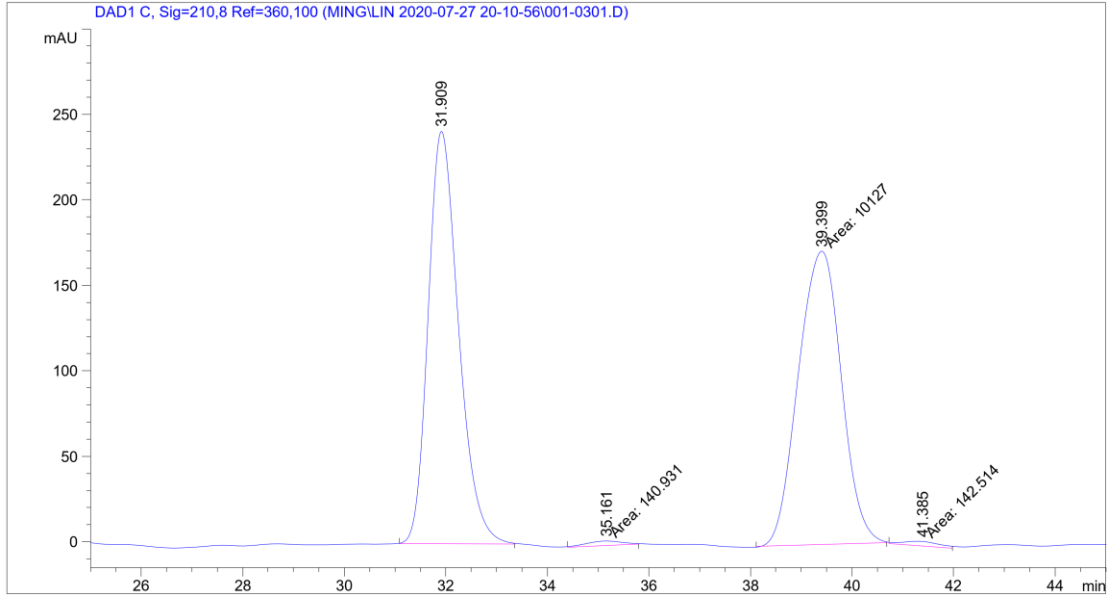

| Peak # | RetTime [min] | Type | Width [min] | Area [mAU*s] | Height [mAU] | Area %  |
|--------|---------------|------|-------------|--------------|--------------|---------|
| 1      | 31.909        | BB   | 0.6406      | 1.00616e4    | 241.24959    | 49.1479 |
| 2      | 35.161        | MM   | 0.8467      | 140.93054    | 2.77427      | 0.6884  |
| 3      | 39.399        | MM   | 0.9827      | 1.01270e4    | 171.75673    | 49.4675 |
| 4      | 41.385        | MM   | 0.8469      | 142.51358    | 2.80457      | 0.6961  |

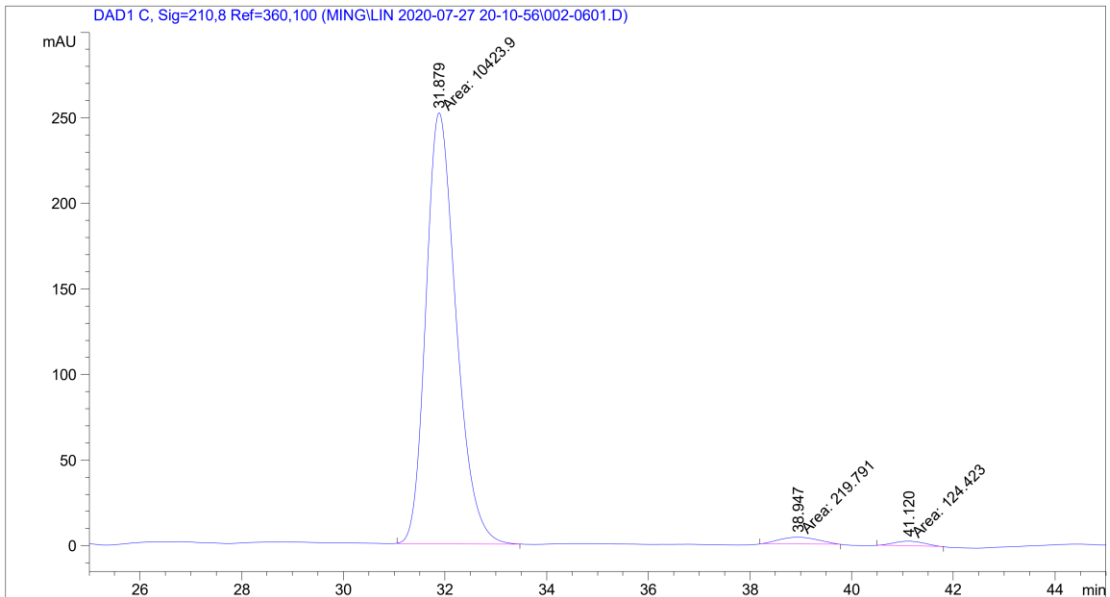

| Peak # | RetTime [min] | Type | Width [min] | Area [mAU*s] | Height [mAU] | Area %  |
|--------|---------------|------|-------------|--------------|--------------|---------|
| 1      | 31.879        | MM   | 0.6896      | 1.04239e4    | 251.93739    | 96.8034 |
| 2      | 38.947        | MM   | 0.8948      | 219.79094    | 4.09401      | 2.0411  |
| 3      | 41.120        | MM   | 0.7166      | 124.42339    | 2.89389      | 1.1555  |

**(5*R*,6*R*)-6-(((Allyldimethylsilyl)oxy)methyl)-5-hydroxy-6-methyloct-7-en-2-one (3)**

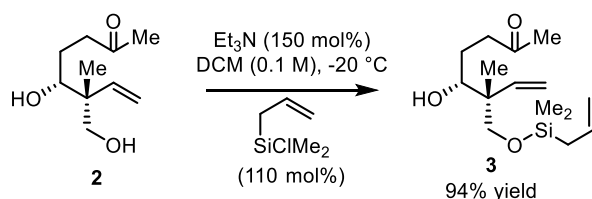

**Detailed Procedures**

To a solution of **2** (4.88 g, 26 mmol, 100 mol%) in anhydrous DCM (268 mL), freshly distilled triethylamine (5.45 mL, 39 mmol, 150 mol%) was added and the resulting mixture was cooled to -20 °C. Allyl(chloro)dimethylsilane (4.0 mL, 28 mmol, 105 mol%) was added dropwise via syringe over 1.5 hours. The mixture was allowed to stir for 30 min at the same temperature and quenched by addition of saturated NaHCO<sub>3</sub> aqueous solution. The two layers were separated. The organic layer was washed with brine and dried (Na<sub>2</sub>SO<sub>4</sub>). The solvent was removed under reduced pressure, and the residue was subjected to flash column chromatography on silica gel (hexanes/acetone = 15/1). The title compound **3** was obtained as a light yellow liquid (7.01 g, 25 mmol) in 94% yield. *Product exists as an equilibrating mixture between hydroxy ketone and two diastereomeric lactols (equilibrated ratio 0.74:0.13:0.13).*

**<sup>1</sup>H NMR** (400 MHz, CDCl<sub>3</sub>) δ 5.98 (dd, *J* = 17.8, 11.1 Hz, 1H (major)), 5.94\* (dd, *J* = 17.8, 11.0 Hz, 1H (minor1)), 5.88-5.72 (m, 1H (major, minor1, minor2)), 5.21\* (dd, *J* = 11.0, 1.5 Hz, 1H (minor1)), 5.17 (dd, *J* = 11.1, 1.3 Hz, 1H (major)), 5.16\* (dd, *J* = 11.0, 1.6 Hz, 1H (minor2)), 5.12\* (dd, *J* = 17.8, 1.6 Hz, 1H (minor1)), 5.09\* (dd, *J* = 17.7, 1.7 Hz, 1H (minor2)), 5.06 (dd, *J* = 17.8, 1.3 Hz, 1H (major)), 4.96-4.82 (m, 2H (major, minor1, minor2)), 4.23-4.16\* (m, 1H (minor2)), 4.05-3.96\* (m, 1H (minor1)), 3.71 (d, *J* = 9.7 Hz, 1H (major)), 3.61\* (d, *J* = 9.7 Hz, 1H (minor1)), 3.60\* (d, *J* = 9.6 Hz, 1H (minor2)), 3.51 (d, *J* = 9.7 Hz, 1H (major)), 3.51-3.46 (m, 1H (major, minor2)), 3.48\* (d, *J* = 9.6 Hz, 1H (minor1)), 3.40 (dd, *J* = 4.7, 1.0 Hz, 1H (major)), 3.38\* (d, *J* = 9.6 Hz, 1H (minor2)), 2.72 (ddd, *J* = 17.6, 8.4, 5.8 Hz, 1H (major)), 2.53\* (br, 1H (minor1)), 2.53 (ddd, *J* = 17.8, 8.2, 6.7 Hz, 1H (major)), 2.15 (s, 3H (major)), 2.11\* (t, *J* = 0.9 Hz, 1H (minor2)), 2.07-1.88\* (m, 2H (minor1, minor2)), 1.85-1.73 (m, 1H (major, minor1) + 2H (minor2)), 1.73-1.66\* (m, 1H (minor1)), 1.65-1.60 (m, 2H (major, minor1, minor2)), 1.59-1.47 (m, 1H (major1)), 1.50 (s, 1H (minor2)), 1.49 (s, 1H (minor1)), 0.98 (s, 3H (major)), 0.97\* (s, 3H (minor1)), 0.93\* (s, 3H (minor2)), 0.13 (s, 6H (major)), 0.11\* (s, 6H (minor1)), 0.09\* (s, 6H (minor2)).

The spectral data recorded for the compound was in complete agreement with the literature.<sup>2</sup>

**(R)-5-Hydroxy-5-((R)-2,2,6-Trimethyl-2,3,6,7-tetrahydro-1,2-oxasilepin-6-yl)pentan-2-one (4)**

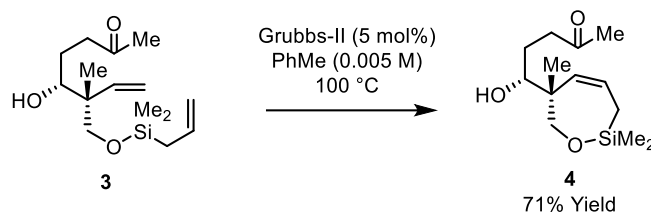

**Detailed Procedures**

A solution of **3** (2.3 g, 8.1 mmol, 100 mol%) in toluene (1570 mL) was degassed by freeze-pump-thaw cycle three times. The solution was heated to 100 °C, and a freshly made solution of Grubbs-II catalyst (0.343 g, 0.4 mmol, 5 mol%) in toluene (36 mL) was added via syringe pump over a 2 hour period. The reaction mixture was allowed to stir at the same temperature for 3 hours. The reaction mixture was allowed to cool to ambient temperature and was cooled further in an ice bath, at which point DMSO (1.43 mL, 20 mmol, 250 mol%) was added. After stirring for 12 hours, the solvent was removed under reduced pressure. The residue was subjected to flash column chromatography on silica gel (pretreated with triethylamine, hexanes/acetone = 15/1). The title compound **4** was obtained as a brown oil (1.48 g, 5.75 mmol) in 71% yield, which solidified upon standing in a -20 °C freezer. *Product exists as an equilibrating mixture between hydroxy ketone and two diastereomeric lactols (equilibrated ratio 0.55:0.26:0.19).*

**<sup>1</sup>H NMR** (400 MHz, CDCl<sub>3</sub>) δ 5.78 (dt, *J* = 11.6, 7.3 Hz, 1H (major)), 5.74\* (dt, *J* = 11.7, 7.3 Hz, 1H (minor2)), 5.66\* (ddd, *J* = 11.7, 7.8, 6.8 Hz, 1H (minor1)), 5.21 (d, *J* = 12.4 Hz, 1H (major)), 5.17\* (d, *J* = 12.0 Hz, 1H (minor2)), 5.15\* (d, *J* = 12.0 Hz, 1H (minor1)), 4.23\* (dd, *J* = 11.9, 0.8 Hz, 1H (minor1)), 4.07\* (d, *J* = 11.7 Hz, 1H (minor2)), 4.05\* (dd, *J* = 8.1, 5.6 Hz, 1H (minor1)), 4.00 (dd, *J* = 11.9, 0.9 Hz, 1H (major)), 3.88\* (dd, *J* = 10.3, 6.4 Hz, 1H (minor2)), 3.81 (d, *J* = 11.9 Hz, 1H (major)), 3.65\* (dd, *J* = 12.0, 0.7 Hz, 1H (minor1)), 3.57\* (dd, *J* = 11.7, 0.9 Hz, 1H (minor2)), 3.39 (ddd, *J* = 11.0, 4.7, 2.2 Hz, 1H (major)), 3.27\* (br, 1H (minor1)), 2.97 (dd, *J* = 4.7, 0.7 Hz, 1H (major)), 2.70 (ddd, *J* = 17.8, 7.8, 6.1 Hz, 1H (major)), 2.55 (dt, *J* = 17.7, 7.2 Hz, 1H (major)), 2.25-2.14\* (m, 1H (minor1)), 2.16 (s, 3H (major)), 2.13-2.03\* (m, 1H (minor2)), 2.01-1.74 (m, 1H (major) + 3H (minor1, minor2)), 1.70-1.56 (m, 3H (major) + 2H (minor1, minor2)), 1.54-1.44\* (m, 1H (minor2)), 1.51\* (s, 3H (minor2)), 1.50\* (s, 3H (minor1)), 0.99\* (s, 3H (minor1)), 0.98\* (s, 3H (minor2)), 0.92 (s, 3H (major)), 0.16\* (s, 3H (minor1)), 0.15 (s, 3H (major)), 0.14 (s, 3H (major)), 0.14\* (s, 3H (minor1)), 0.13\* (s, 3H (minor2)), 0.13\* (s, 3H (minor2)).

The spectral data recorded for the compound was in complete agreement with the literature.<sup>2</sup>

**(4a*R*,8a*R*)-2,2,4a,6-Tetramethyl-5-vinyl-4a,7,8,8a-tetrahydro-4H-benzo[d][1,3]dioxine**  
**(6)**

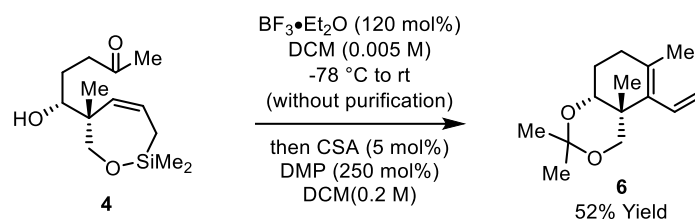

**Detailed Procedures**

To a solution of **4** (1.20 g, 4.46 mmol, 100 mol%) in DCM (940 mL) at  $-78^\circ\text{C}$ ,  $\text{BF}_3 \cdot \text{OEt}_2$  (0.69 mL, 5.57 mmol, 120 mol%) was added dropwise. The resulting solution was allowed to warm to room temperature over an hour and was allowed to stir for 24 hours.  $\text{NaHCO}_3$  (aq., sat., 400 mL) was added and the reaction mixture was allowed to stir vigorously overnight. The reaction mixture was transferred to a separatory funnel and the aqueous layer was extracted with DCM (150 mL  $\times$  2). The combined organic layers were washed with brine (150 mL) and dried ( $\text{Na}_2\text{SO}_4$ ). The solvent was removed under reduced pressure ( $<30^\circ\text{C}$ ), and the crude residue was dissolved in DCM (20 mL). 2,2-Dimethoxypropane (DMP, 1.4 mL, 11.2 mmol, 250 mol%) and (+)-10-camphorsulfonic acid (CSA, 54 mg, 0.23 mmol, 5 mol%) were added at room temperature, and the reaction mixture was allowed to stir for 5 hours.  $\text{NaHCO}_3$  (aq., sat., 10 mL) was added to the reaction mixture. The reaction mixture was transferred to a separatory funnel, and the aqueous layer was extracted with DCM (20 mL  $\times$  2). The combined organic layers were washed with brine (10 mL) and dried ( $\text{Na}_2\text{SO}_4$ ). The solvent was removed under reduced pressure ( $<30^\circ\text{C}$ ), and the residue was submitted to flash column chromatography on a short plug of basic alumina (DCM). The title compound **6** was obtained as a colorless oil (0.537 g, 2.32 mmol) in 52% yield.

**$^1\text{H NMR}$**  (500 MHz,  $\text{CDCl}_3$ )  $\delta$  6.17 (dd,  $J = 17.8, 11.3$  Hz, 1H), 5.24 (dd,  $J = 11.3, 2.4$  Hz, 1H), 5.00 (dd,  $J = 17.8, 2.4$  Hz, 1H), 3.80 – 3.75 (m, 2H), 3.45 (d,  $J = 11.8$  Hz, 1H), 2.29 (td,  $J = 14.8, 13.7, 9.4$  Hz, 1H), 1.84 – 1.75 (m, 2H), 1.72 (s, 3H), 1.69 – 1.64 (m, 1H), 1.41 (s, 3H), 1.29 (s, 3H), 0.90 (s, 3H).

**$^{13}\text{C NMR}$**  (125 MHz,  $\text{CDCl}_3$ )  $\delta$  134.6, 132.1, 130.6, 118.4, 98.0, 71.8, 67.3, 36.6, 28.2, 27.3, 23.5, 22.2, 21.1, 20.1.

**$R_f$**  0.69 (DCM, UV/ $\text{KMnO}_4$ )

**HRMS** (CI) Calcd. for  $\text{C}_{14}\text{H}_{22}\text{O}_2$   $[\text{M}]^+$ : 222.1620, found: 222.1615.

**FTIR** (neat): 2989, 2932, 2864, 1447, 1240, 1227, 1197, 1122, 1085  $\text{cm}^{-1}$ .

**Optical Rotation**  $[\alpha]_{\text{D}}^{26} = -124^\circ$  ( $c = 1.0, \text{CHCl}_3$ )



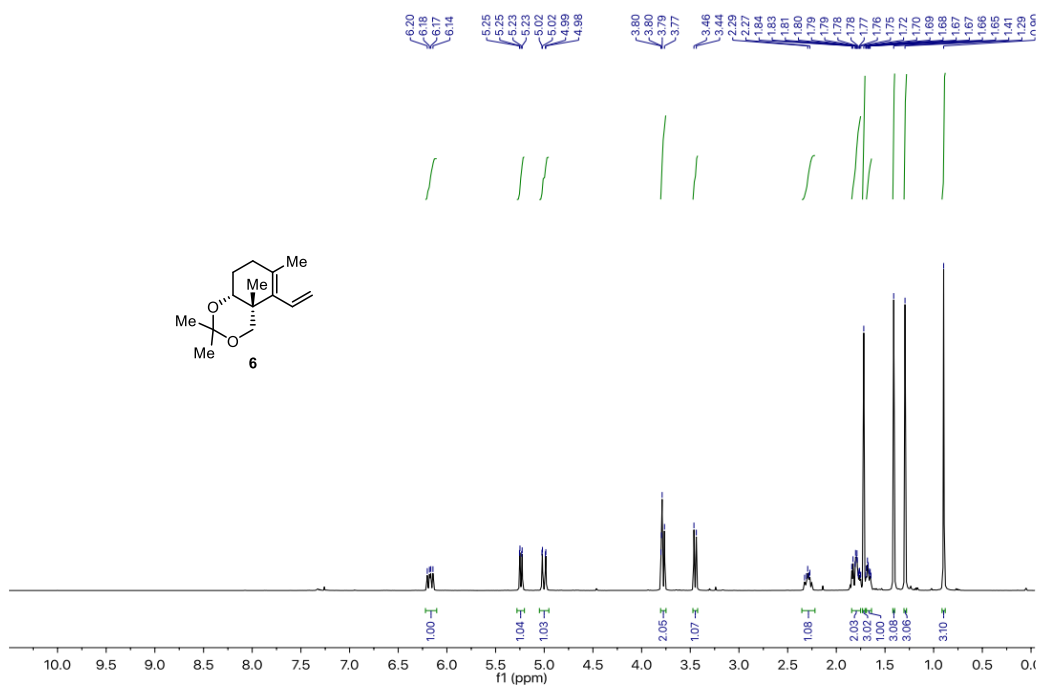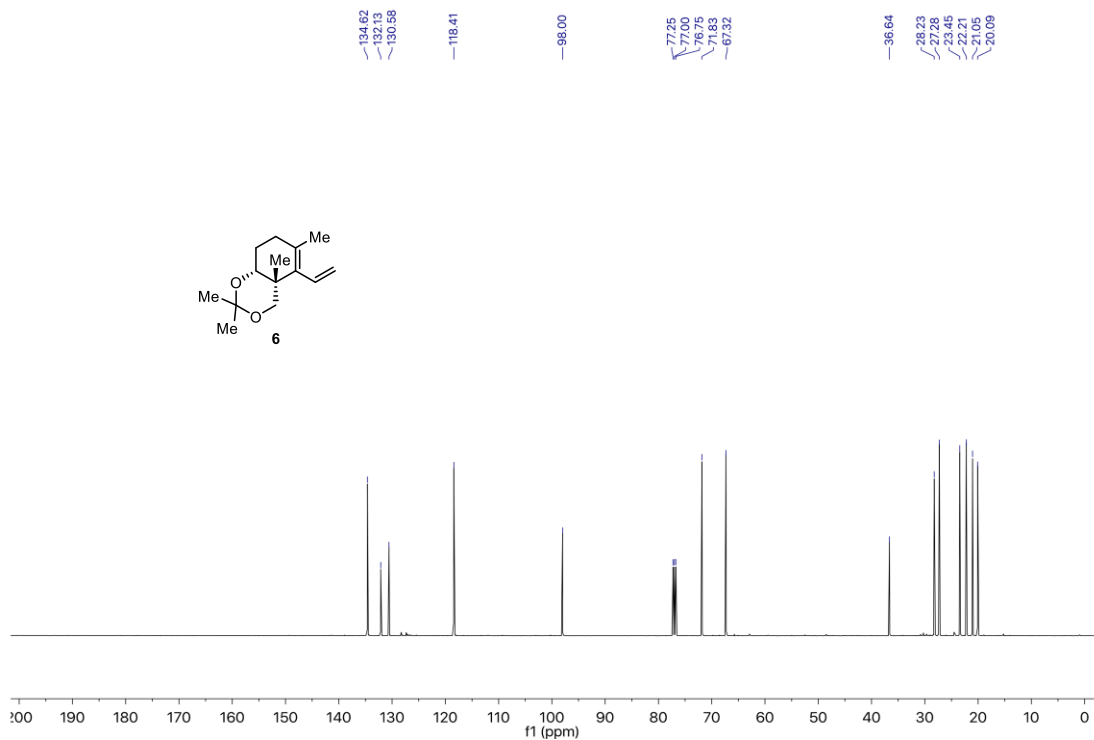

**Dimethyl (4a*R*,6a*R*,10b*R*)-3,3,6a,10b-tetramethyl-4a,5,6,6a,9,10b-hexahydro-1H-naphtho[2,1-d][1,3]dioxine-7,8-dicarboxylate (**8**)**

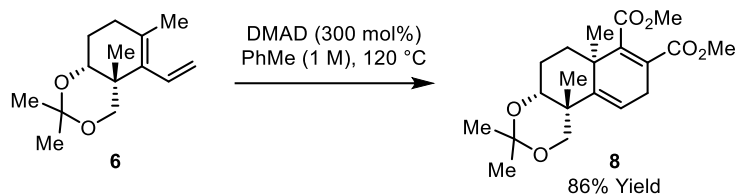

**Detailed Procedures**

To a solution of **6** (165 mg, 0.74 mmol, 100 mol%) in toluene (0.7 mL) was added dimethyl acetylenedicarboxylate (DMAD, 316 mg, 2.23 mmol, 300 mol%). The mixture was heated to 120 °C in seal tube for 24 hours with stirring. The reaction mixture was allowed to cool to ambient temperature. The solvent was removed and the residue was subjected to flash column chromatography on silica gel (hexanes/ethyl acetate = 15/1 to 5/1). The title compound **8** was obtained as a colorless oil (207 mg, 0.64 mmol) in 86% yield.

**<sup>1</sup>H NMR** (400 MHz, CDCl<sub>3</sub>) δ 5.84 (dd, *J* = 6.3, 1.7 Hz, 1H), 3.97 (d, *J* = 12.0 Hz, 1H), 3.82 (s, 3H), 3.80 (dd, *J* = 7.4, 1.5 Hz, 1H), 3.74 (s, 3H), 3.50 (d, *J* = 12.1 Hz, 1H), 3.20 (dd, *J* = 22.0, 6.3 Hz, 1H), 2.89 (dd, *J* = 22.0, 1.7 Hz, 1H), 2.20 – 2.07 (m, 1H), 1.92 – 1.75 (m, 2H), 1.63 – 1.55 (m, 2H), 1.51 (s, 3H), 1.42 (s, 3H), 1.36 (s, 3H), 1.01 (s, 3H).

**<sup>13</sup>C NMR** (125 MHz, CDCl<sub>3</sub>) δ 169.7, 166.3, 152.3, 144.8, 126.5, 119.8, 98.7, 72.4, 68.4, 52.3, 52.1, 38.8, 38.6, 28.3, 28.3, 27.0, 26.2, 25.2, 24.7, 20.9.

**R<sub>f</sub>** 0.35 (hexanes/ethyl acetate = 7:3, UV/KMnO<sub>4</sub>)

**HRMS** (ESI) Calcd. for (M+Na)<sup>+</sup> 387.1778, found: 387.1779.

**FTIR** (neat): 3465, 2953, 1731, 1438, 1378, 1262, 1203 cm<sup>-1</sup>.

**Optical Rotation** [ $\alpha$ ]<sub>D</sub><sup>26</sup> = +84° (*c* = 1.0, CHCl<sub>3</sub>)

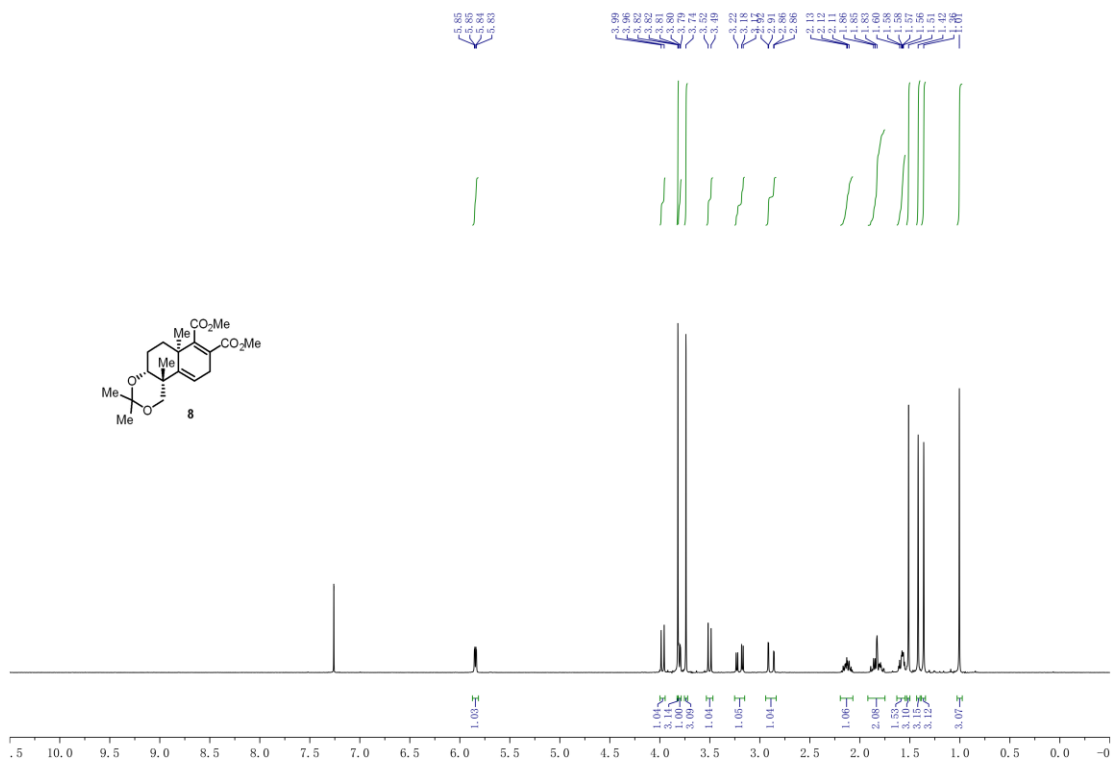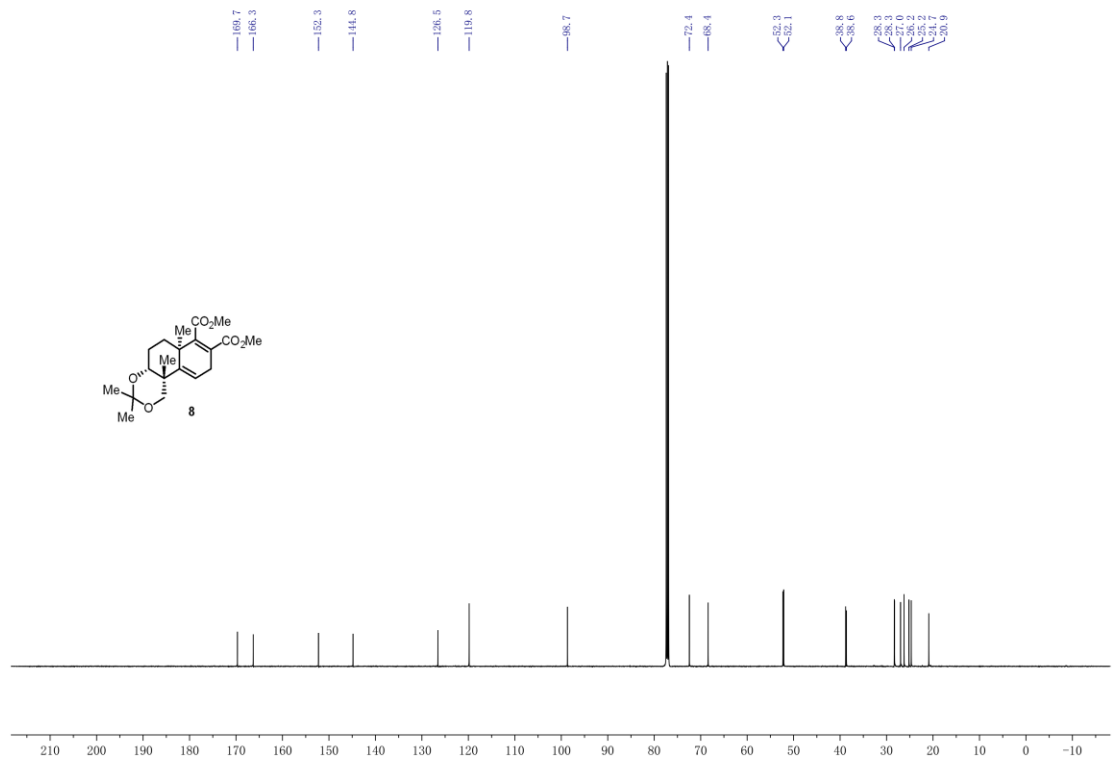

**Dimethyl (4a*R*,6a*R*,10a*R*,10b*R*)-3,3,6a,10b-tetramethyl-4a,5,6,6a,9,10,10a,10b-octahydro-1*H*-naphtho[2,1-*d*][1,3]dioxine-7,8-dicarboxylate (9)**

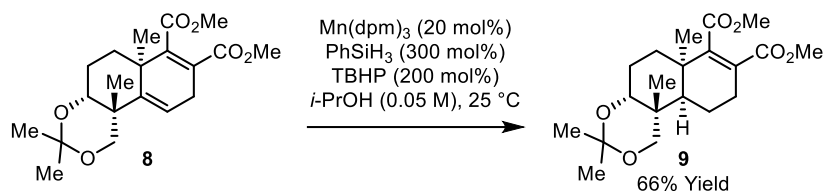

**Detailed Procedures**

To a reaction vessel charged with a solution of olefin **8** (54 mg, 0.15 mmol, 100 mol%) in anhydrous *i*-PrOH (3 mL) under argon, was added phenylsilane (54  $\mu$ L, 0.44 mmol, 300 mol%) and TBHP (5.5 M in decane, 53  $\mu$ L, 0.29 mmol, 200 mol%). The resulting mixture was degassed by bubbling argon through the solution for 20 minutes. Mn(dpm)<sub>3</sub> (133 mg, 0.22 mmol, 20 mol%) was then added in one portion and the reaction was then degassed for an additional 30 seconds, and was allowed to stir at ambient temperature for 8 hours. After completion, the solvent was removed and subjected to flash column chromatography on silica gel (hexanes/ethyl acetate = 10/1 to 4/1). The title compound **9** was obtained as a white solid (36 mg, 0.10 mmol) in 66% yield.

**<sup>1</sup>H NMR** (500 MHz, CDCl<sub>3</sub>)  $\delta$  3.82 (s, 3H), 3.70 (s, 3H), 3.69 (d,  $J = 12.2$  Hz, 1H), 3.62 (s, 1H), 3.35 (d,  $J = 12.2$  Hz, 1H), 2.49 – 2.39 (m, 1H), 2.37 – 2.29 (m, 2H), 2.17 – 2.06 (m, 1H), 1.83 (qd,  $J = 15.7, 5.9$  Hz, 3H), 1.46 – 1.42 (m, 1H), 1.42 (s, 3H), 1.41 (s, 3H), 1.31 (s, 3H), 0.81 (s, 3H).

**<sup>13</sup>C NMR** (125 MHz, CDCl<sub>3</sub>)  $\delta$  170.1, 166.9, 151.0, 128.6, 98.3, 74.0, 67.9, 52.2, 52.0, 37.0, 35.8, 35.7, 33.2, 30.7, 29.9, 24.7, 23.0, 19.0, 17.6, 16.5.

**R<sub>f</sub>** 0.2 (hexanes/ethyl acetate = 5/1, UV/KMnO<sub>4</sub>)

**HRMS** (ESI) Calcd. for (M+Na)<sup>+</sup> 389.1935, found: 389.1938.

**FTIR** (neat): 2948, 1721, 1433, 1378, 1251, 1199, 1136, 1090, 1073, 1057, 730 cm<sup>-1</sup>.

**MP** 120-122 °C

**Optical Rotation**  $[\alpha]_D^{26} = -44^\circ$  ( $c = 0.32$ , CHCl<sub>3</sub>)

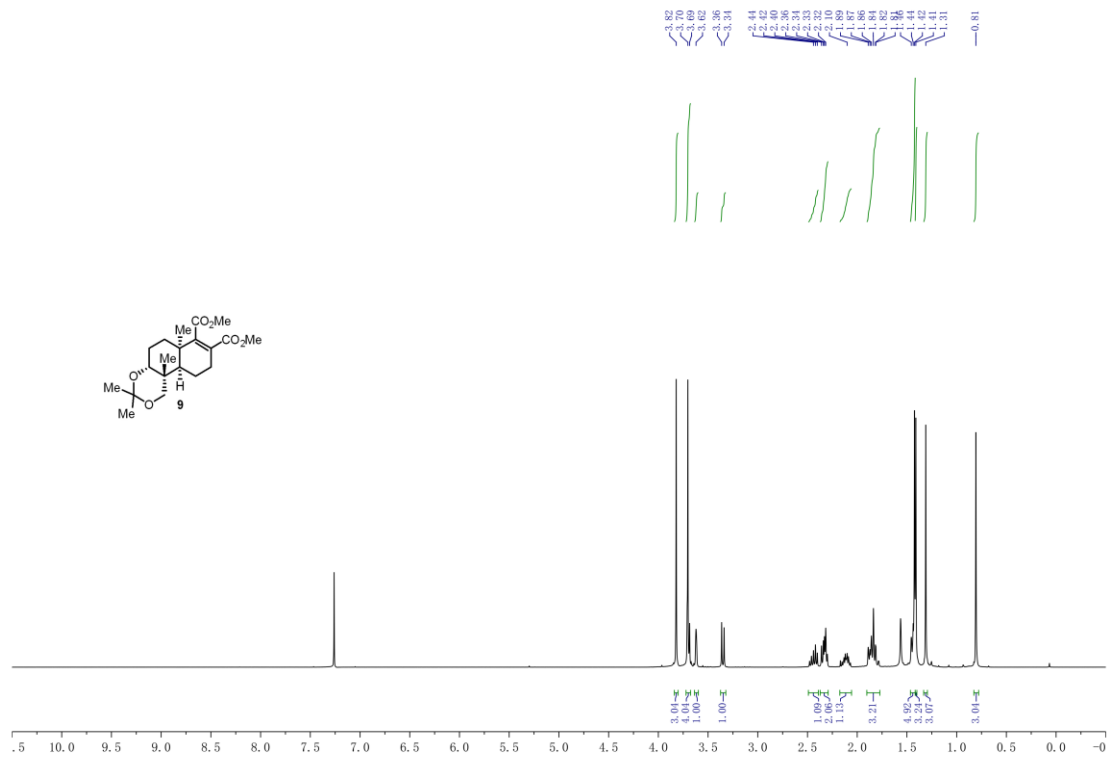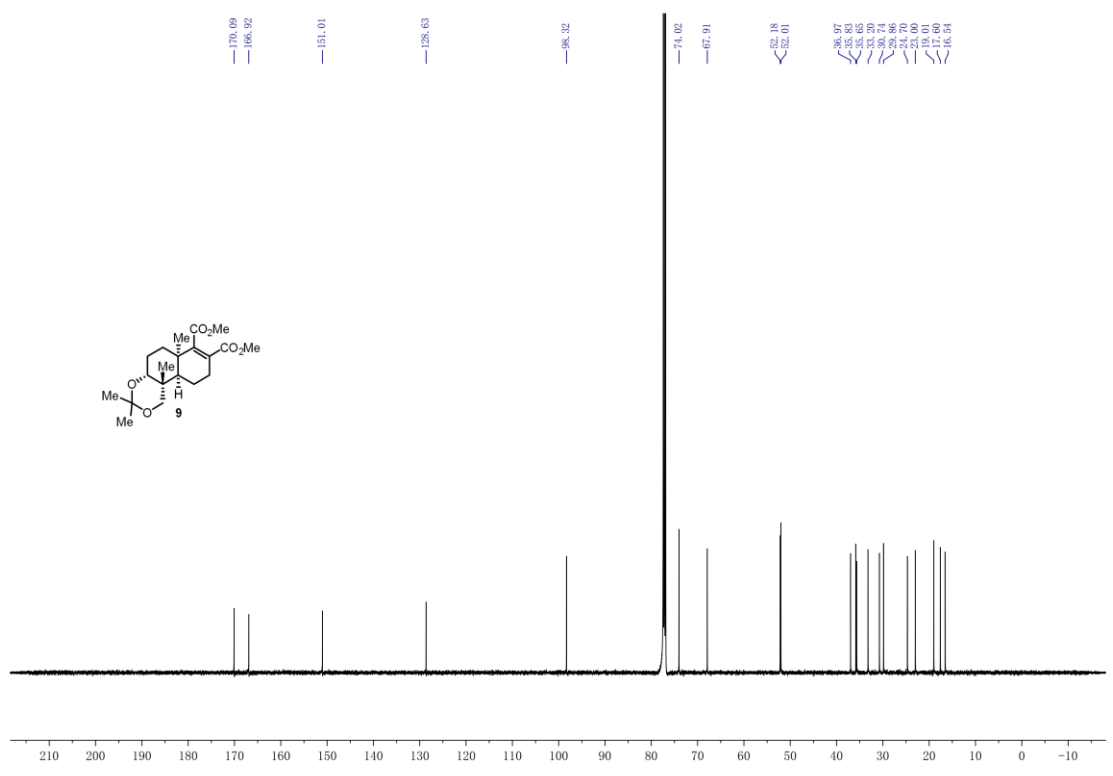

**Dimethyl (5*R*,6*R*,8*aR*)-6-hydroxy-5-(hydroxymethyl)-5,8a-dimethyl-3,5,6,7,8,8a hexahydronaphthalene-1,2-dicarboxylate (**10**)**

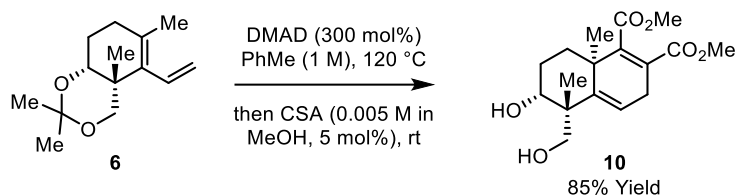

**Detailed Procedures**

To a solution of **6** (332 mg, 1.49 mmol, 100 mol%) in toluene (1.5 mL) was added dimethyl acetylenedicarboxylate (DMAD, 640 mg, 4.5 mmol, 300 mol%). The mixture was heated to 120 °C in seal tube for 24 hours. The reaction mixture was allowed to cool to ambient temperature and a solution of (+)-10-camphorsulfonic acid (CSA, 0.005 M in MeOH, 14 mL, 5 mol%) was added. The resulted mixture was allowed to stir at the same temperature for 3 hours. The solvent was removed and the residue was subjected to flash column chromatography on silica gel (hexanes/ethyl acetate = 2/1 to 1/1). The title compound **10** was obtained as a colorless oil (412 mg, 1.27 mmol) in 85% yield.

**<sup>1</sup>H NMR** (500 MHz, CDCl<sub>3</sub>) δ 5.80 (dd, *J* = 5.8, 2.1 Hz, 1H), 4.13 (d, *J* = 11.1 Hz, 1H), 3.84 (d, *J* = 32.7 Hz, 1H), 3.73 (s, 3H), 3.67 (s, 3H), 3.44 (dd, *J* = 11.8, 4.3 Hz, 1H), 3.27 (d, *J* = 11.0 Hz, 1H), 3.14 (dd, *J* = 22.7, 5.8 Hz, 1H), 2.00 – 1.85 (m, 1H), 1.81 – 1.73 (m, 1H), 1.61 (td, *J* = 13.6, 3.7 Hz, 1H), 1.51 (dt, *J* = 13.3, 3.7 Hz, 1H), 1.32 (s, 3H), 1.28 (s, 3H).

**<sup>13</sup>C NMR** (125 MHz, CDCl<sub>3</sub>) δ 169.3, 166.1, 149.6, 143.4, 125.4, 122.6, 77.5, 77.0, 68.5, 52.3, 52.1, 46.4, 38.1, 32.6, 27.1, 26.9, 26.0, 22.2.

**R<sub>f</sub>** 0.2 (hexanes/ethyl acetate = 1:1, UV/KMnO<sub>4</sub>)

**HRMS** (ESI) Calcd. for (M+Na)<sup>+</sup> 347.1465, found: 347.1474.

**FTIR** (neat): 3426, 2949, 2880, 2360, 1720, 1668, 1634, 1434, 1259 cm<sup>-1</sup>.

**Optical Rotation** [ $\alpha$ ]<sub>D</sub><sup>26</sup> = +180° (*c* = 1.0, CHCl<sub>3</sub>)

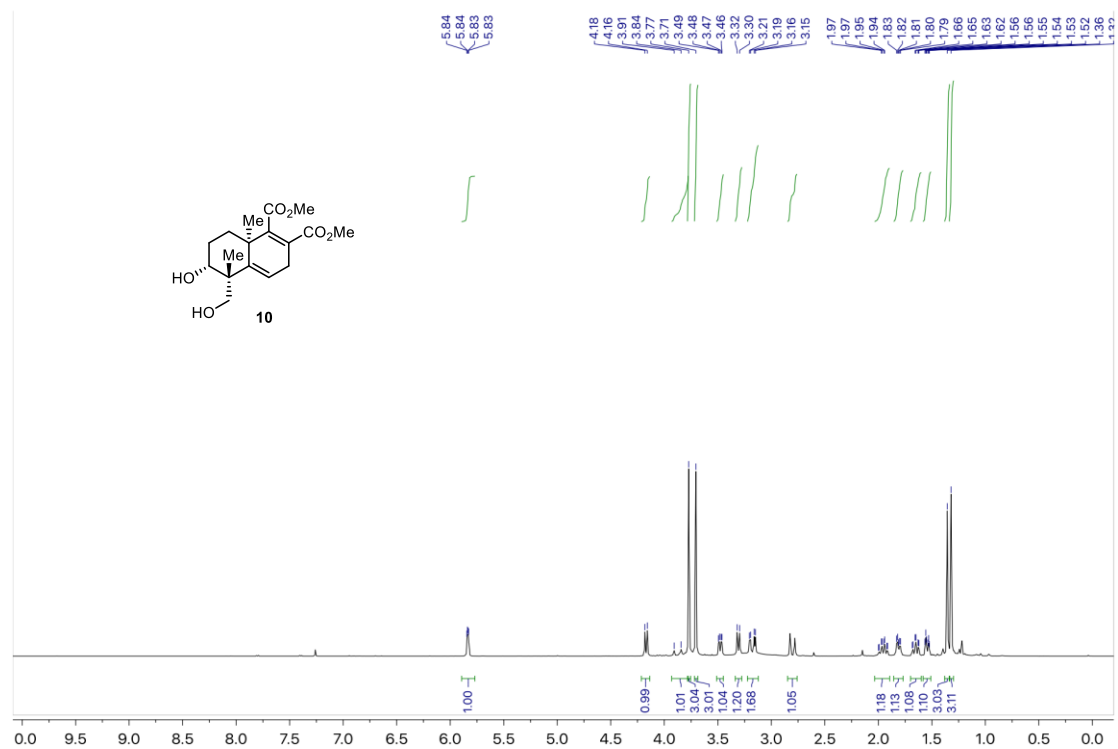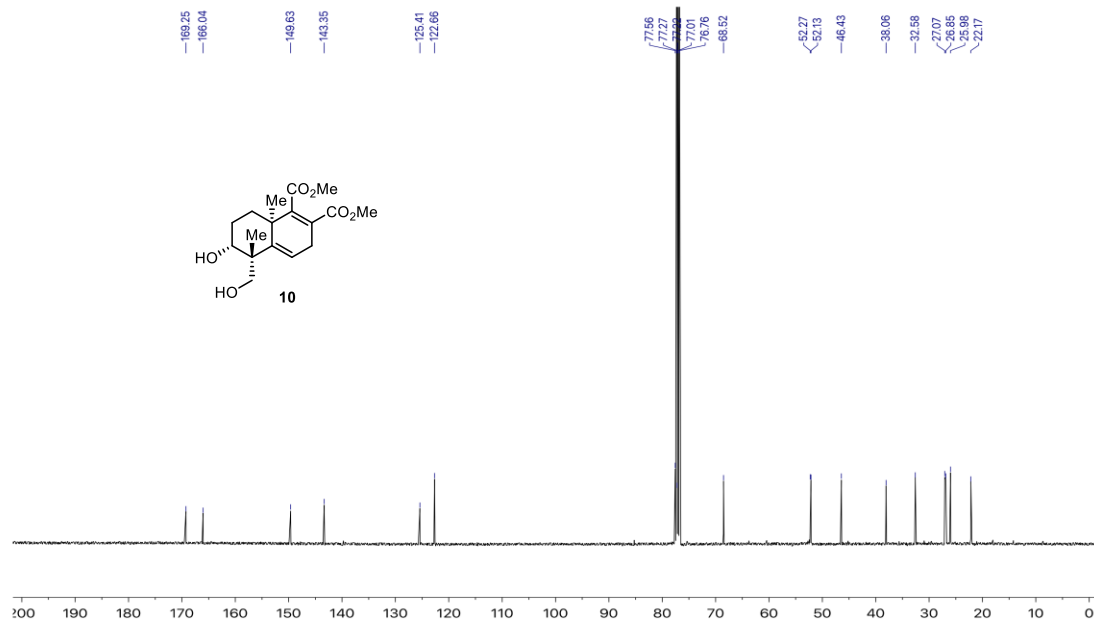

**Dimethyl (4a*S*,5*R*,6*R*,8a*R*)-6-hydroxy-5-(hydroxymethyl)-5,8a-dimethyl-3,4,4a,5,6,7,8,8a-octahydronaphthalene-1,2-dicarboxylate (**11**)**

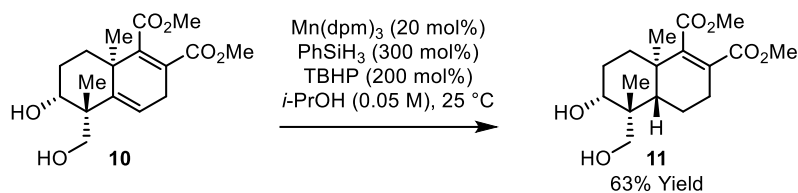

**Detailed Procedures**

To a reaction vessel charged with a solution of olefin **10** (356 mg, 1.1 mmol, 100 mol%) in anhydrous *i*-PrOH (22 mL) under argon, was added phenylsilane (402  $\mu$ L, 3.3 mmol, 300 mol%) and TBHP (5.5 M in decane, 396  $\mu$ L, 2.2 mmol, 200 mol%). The resulting mixture was degassed by bubbling argon through the solution for 20 minutes. Mn(dpm)<sub>3</sub> (133 mg, 0.22 mmol, 20 mol%) was then added in one portion and the reaction was then degassed for an additional 30 seconds. The reaction mixture was allowed to stir at ambient temperature for 8 hours. The solvent was removed and the residue was subjected to flash column chromatography on silica gel (hexanes/ethyl acetate = 2/1 to 1/1). The title compound **11** was obtained as a colorless oil (226 mg, 0.69 mmol) in 63% yield.

**<sup>1</sup>H NMR** (500 MHz, CDCl<sub>3</sub>)  $\delta$  4.20 (d,  $J$  = 11.2 Hz, 1H), 3.75 (s, 3H), 3.69 (s, 3H), 3.63 (d,  $J$  = 4.3 Hz, 1H), 3.46 (dd,  $J$  = 11.4, 4.9 Hz, 1H), 3.38 – 3.28 (m, 1H), 2.95 (s, 1H), 2.87 – 2.77 (m, 1H), 2.47 (ddd,  $J$  = 19.0, 6.5, 1.2 Hz, 1H), 2.35 (ddd,  $J$  = 19.0, 11.2, 7.5 Hz, 1H), 1.98 – 1.72 (m, 3H), 1.59 – 1.40 (m, 3H), 1.26 (s, 3H), 1.20 (s, 3H).

**<sup>13</sup>C NMR** (125 MHz, CDCl<sub>3</sub>)  $\delta$  169.0, 167.2, 150.6, 127.0, 77.2, 52.1, 52.0, 49.6, 42.8, 37.2, 33.7, 27.6, 26.6, 22.4, 20.9, 17.7.

**R<sub>f</sub>** 0.2 (hexanes/ethyl acetate = 1/1, UV/KMnO<sub>4</sub>)

**HRMS** (ESI) Calcd. for (M+Na)<sup>+</sup> 349.1622, found: 349.1632.

**FTIR** (neat): 3400, 2950, 1726, 1434, 1379, 1255, 1039 cm<sup>-1</sup>.

**Optical Rotation**  $[\alpha]_D^{26} = +76^\circ$  ( $c$  = 1.0, CHCl<sub>3</sub>)



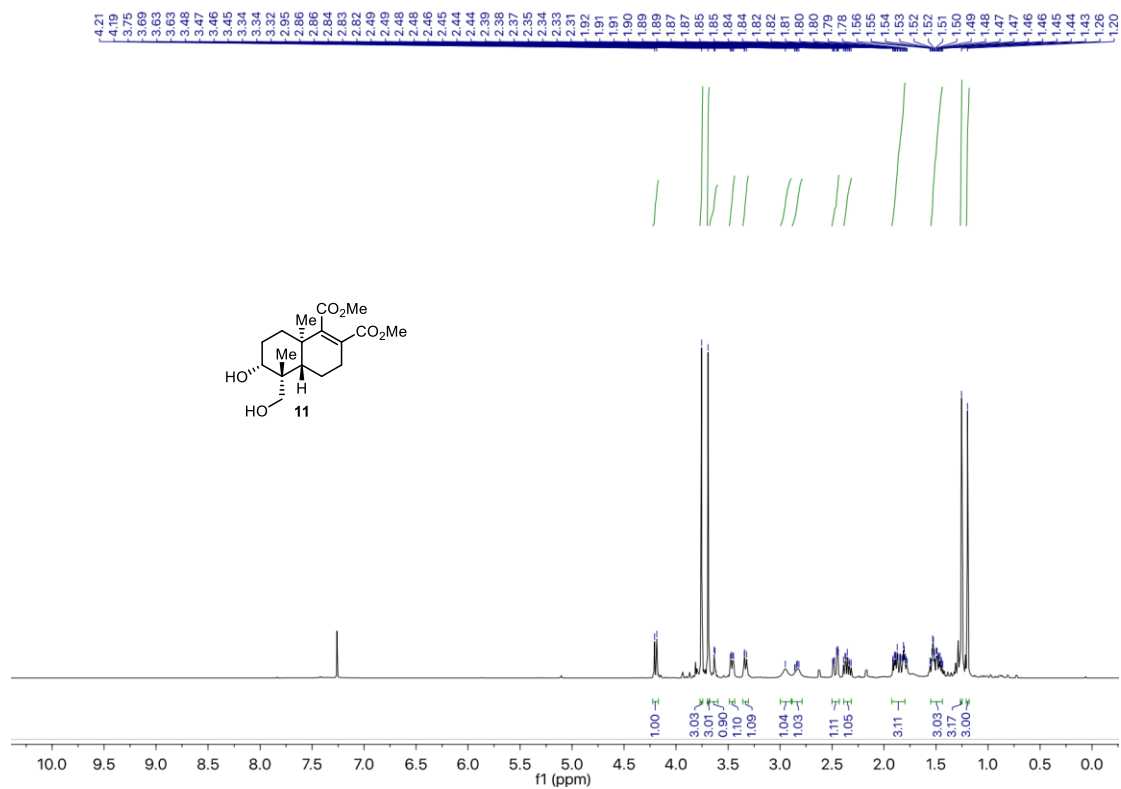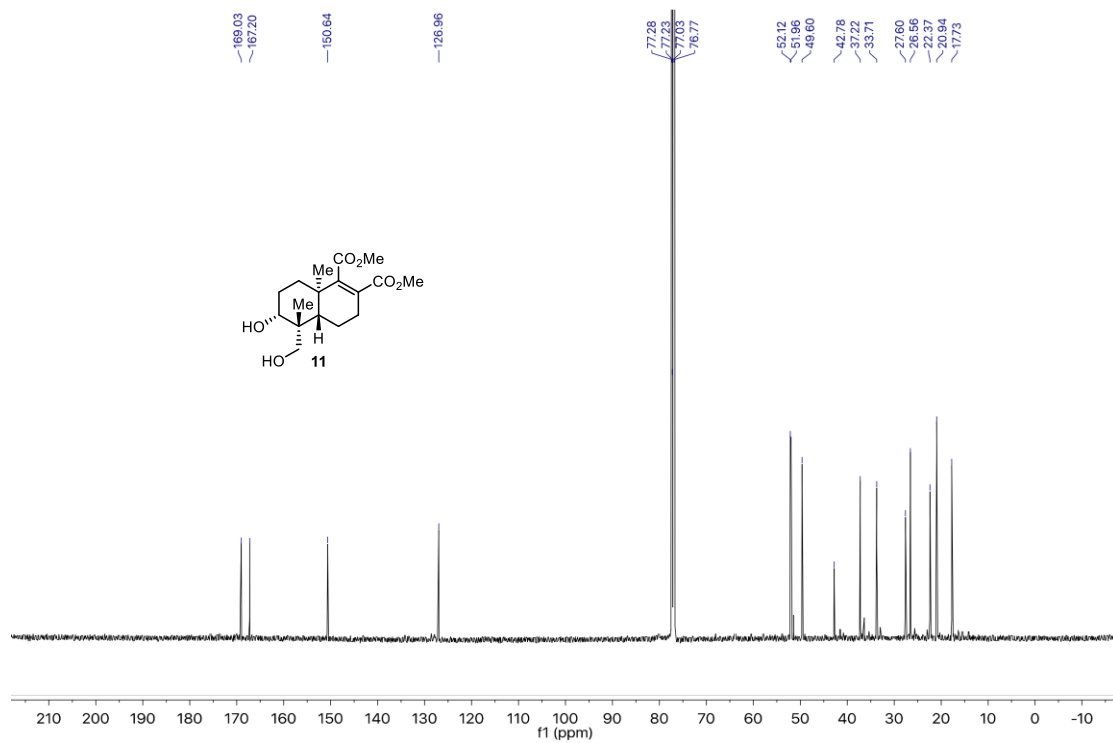

**((4a*S*,5*R*,6*R*,8a*R*)-5,8a-Dimethyl-6-((triisopropylsilyl)oxy)-5-(((triisopropylsilyl)oxy)methyl)-3,4,4a,5,6,7,8,8a-octahydronaphthalene-1,2-diyl)dimethanol (**12**)**

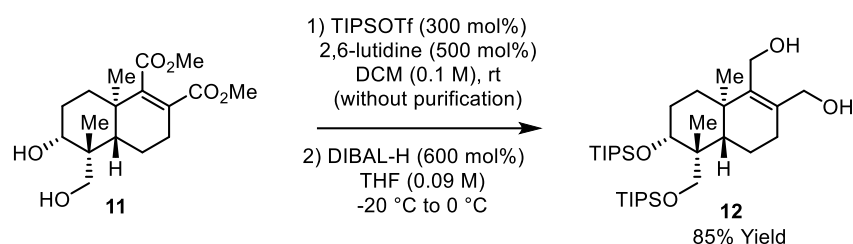

**Detailed Procedures**

To a solution of **11** (190 mg, 0.59 mmol, 100 mol%) in DCM (8 mL) was added 2,6-lutidine (343  $\mu$ L, 2.95 mmol, 500 mol%) and TIPSOTf (478  $\mu$ L, 1.78 mmol, 300 mol%) at 0 °C. The mixture was warmed to room temperature and stirred for 3 hours. Water (10 mL) was added and the reaction mixture was transferred to a separatory funnel. The aqueous layer was extracted with DCM (10 mL  $\times$  2). The combined organic layers were washed with HCl (aq., 1N, 8 mL), NaHCO<sub>3</sub> (aq., sat., 8 mL), brine (10 mL) and dried (Na<sub>2</sub>SO<sub>4</sub>). The solvent was removed and the crude residue was dissolved in THF (9 mL). DIBAL-H (1 M in hexane, 3.6 mL, 3.6 mmol, 600 mol%) was added at -20 °C. The reaction mixture was warmed to 0 °C and stirred for 2 hours. The reaction mixture was diluted with ethyl acetate and a solution of Rochelle's salt (1.0 M aqueous solution) was added. The reaction mixture was transferred to a separatory funnel and the aqueous phase was extracted with ethyl acetate. The combined organic extracts were washed with brine, and dried (Na<sub>2</sub>SO<sub>4</sub>). The solvent was removed under reduced pressure and the residue was subjected to flash column chromatography on silica gel (hexanes/ethyl acetate = 3/1 to 1/1). The title compound **12** was obtained as a white solid (293 mg, 0.5 mmol) in 85% yield.

**<sup>1</sup>H NMR** (400 MHz, CDCl<sub>3</sub>)  $\delta$  4.26 – 4.06 (m, 4H), 4.01 (d,  $J$  = 11.6 Hz, 1H), 3.82 (d,  $J$  = 10.5 Hz, 1H), 3.49 (dd,  $J$  = 11.4, 4.8 Hz, 1H), 2.30 – 2.08 (m, 5H), 1.99 – 1.85 (m, 2H), 1.84 – 1.66 (m, 3H), 1.39 (td,  $J$  = 13.2, 4.0 Hz, 1H), 1.19 (s, 3H), 1.14 (s, 3H), 1.07 – 1.04 (m, 42H).

**<sup>13</sup>C NMR** (125 MHz, CDCl<sub>3</sub>)  $\delta$  146.0, 136.6, 80.2, 65.7, 64.3, 58.4, 51.8, 44.5, 38.2, 34.9, 32.9, 28.1, 23.8, 21.5, 20.2, 18.5, 18.4, 18.3, 18.3, 13.1, 12.1.

**Rf** 0.25 (hexanes/ethyl acetate = 3/1, UV/KMnO<sub>4</sub>)

**HRMS** (ESI) Calcd. for (M+Na)<sup>+</sup> 605.4392, found: 605.4391.

**FTIR** (neat): 2942, 2866, 1463, 1366, 1264, 1093, 1064, 994, 882, 742 cm<sup>-1</sup>.

**MP** 164-166 °C

**Optical Rotation**  $[\alpha]_D^{26} = -61^\circ$  ( $c = 0.14$ , CHCl<sub>3</sub>)

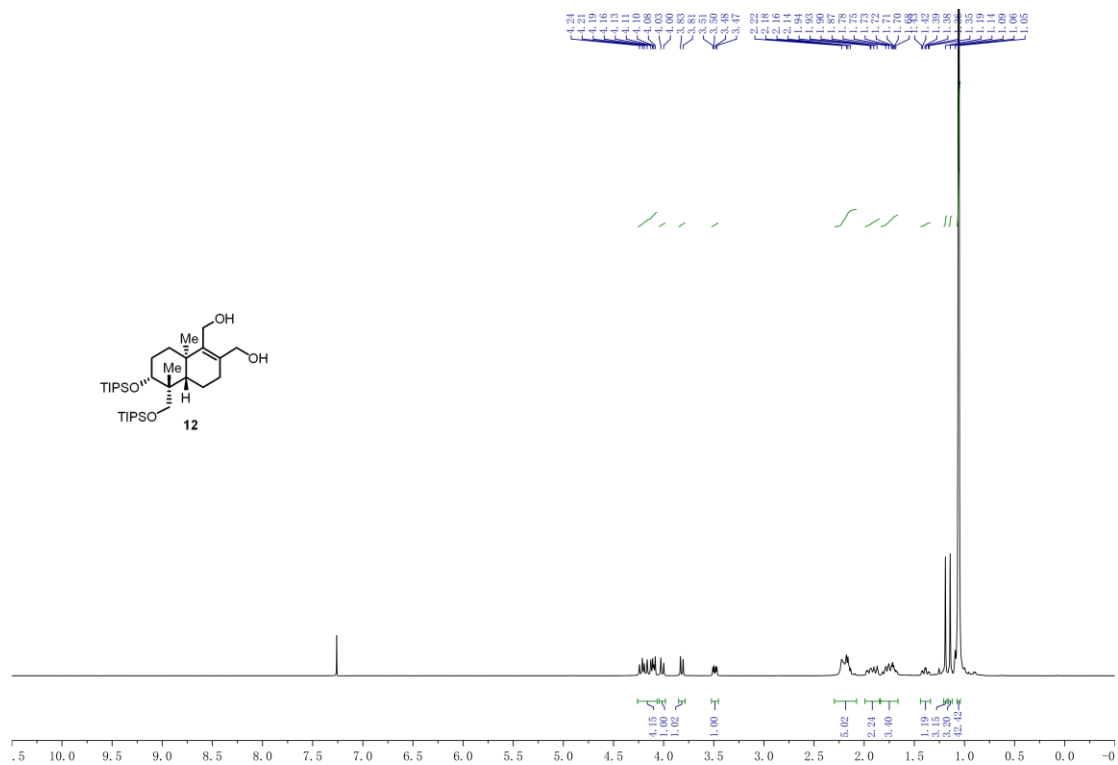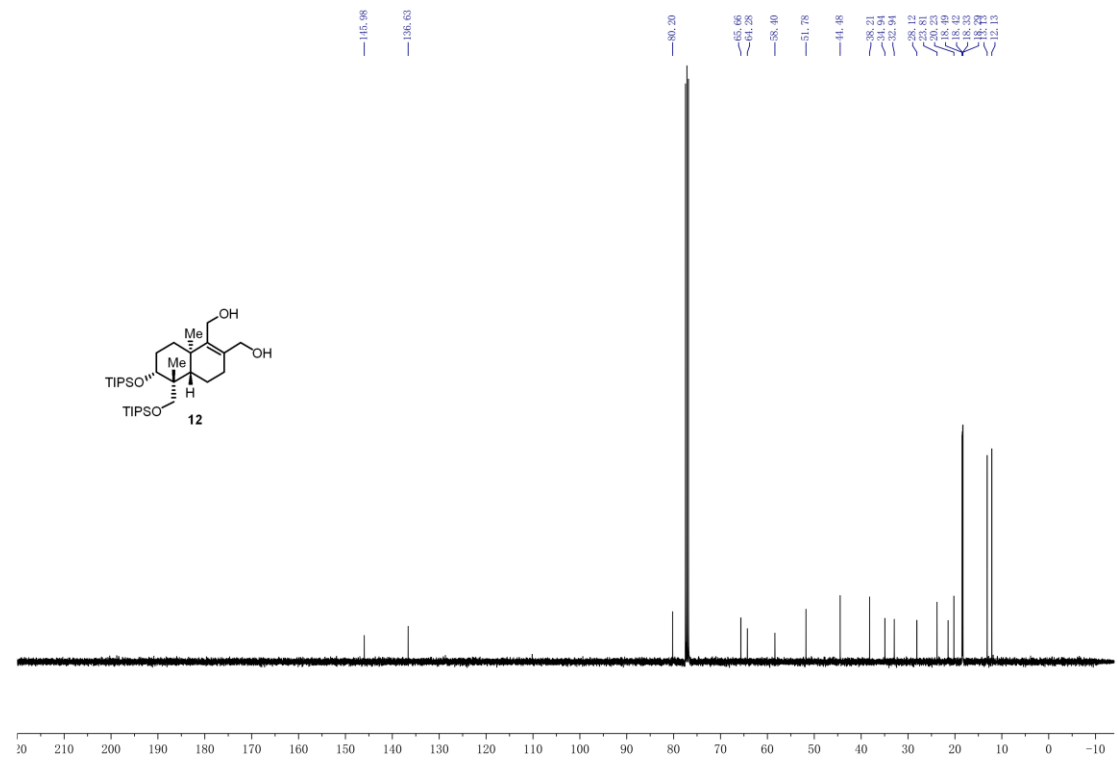

**((1*R*,4*aS*,5*R*,6*R*,8*aR*)-5,8a-Dimethyl-2-methylene-6-((triisopropylsilyloxy)-5-(((triisopropylsilyloxy)methyl)decahydronaphthalen-1-yl)methanol (13)**

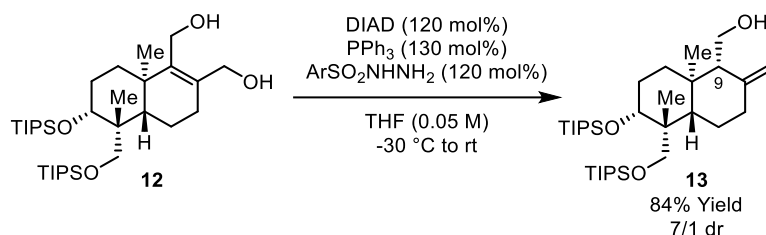

**Detailed Procedures**

Following the known procedure,<sup>3</sup> diisopropylazodicarboxylate (DIAD, 53  $\mu$ L, 0.268 mmol, 120 mol%) was added to a solution of triphenylphosphine (76 mg, 0.290 mmol, 130 mol%) in THF (0.9 mL) at -30 °C. After 10 min, diol **12** (130 mg, 0.223 mmol, 100 mol%) in 0.9 ml THF was added to the cold reaction mixture, followed 10 min later by a solution of 2-nitrobenzenesulfonylhydrazide (NBSH, 58 mg, 0.268 mmol, 120 mol%) in THF (0.4 mL). The reaction mixture was held at -30 °C for 2.5 hours, at which point the reaction mixture was warmed to 23 °C then stirred at this temperature for another 5 hours. The solvent was removed and the residue was subjected to flash silica gel chromatography (hexanes/ethyl acetate = 10/1 to 5/1). The title compound was obtained as a colorless oil (105 mg, 0.187 mmol) in 84% yield as a 7/1 diastereomeric mixture at the newly formed C9 stereocenter.

**<sup>1</sup>H NMR** (400 MHz, CDCl<sub>3</sub>)  $\delta$  4.92 (s, 1H), 4.62 (s, 1H), 4.02 (d,  $J$  = 10.4 Hz, 1H), 3.86 – 3.73 (m, 3H), 3.52 – 3.43 (m, 1H), 2.43 – 2.33 (m, 1H), 1.92 – 1.82 (m, 4H), 1.75 – 1.65 (m, 2H), 1.66 – 1.56 (m, 3H), 1.33 (d,  $J$  = 5.2 Hz, 1H), 1.14 (s, 3H), 1.06 – 1.01 (m, 42H), 0.83 (s, 3H).

**<sup>13</sup>C NMR** (125 MHz, CDCl<sub>3</sub>)  $\delta$  148.0, 106.2, 80.2, 65.1, 59.4, 59.0, 55.7, 44.8, 38.9, 38.8, 37.63, 28.4, 26.6, 23.8, 18.5, 18.4, 18.3, 18.3, 15.7, 13.1, 12.1.

**R<sub>f</sub>** 0.29 (hexanes/ethyl acetate = 5/1, KMnO<sub>4</sub>)

**HRMS** (ESI) Calcd. for (M+Na)<sup>+</sup> 589.4443, found: 589.4453.

**FTIR** (neat): 3286, 2927, 2865, 1463, 1382, 1259, 1135, 1098, 1058, 1012, 882 cm<sup>-1</sup>.

**Optical Rotation**  $[\alpha]_D^{23} = +40^\circ$  ( $c$  = 0.10, CHCl<sub>3</sub>)



**(((1*R*,2*R*,4*aR*,5*R*,8*aS*)-5-(Iodomethyl)-1,4*a*-dimethyl-6-methylene-1-(((triisopropylsilyl)oxy)methyl)decahydronaphthalen-2-yl)oxy)triisopropylsilane (**14**)**

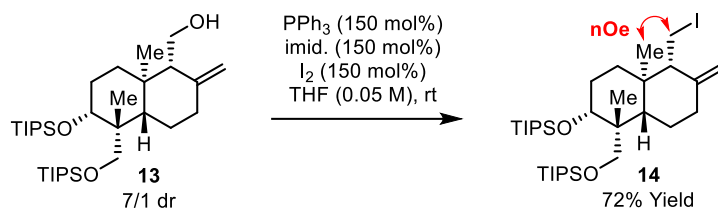

**Detailed Procedures**

To a solution of  $\text{PPh}_3$  (69.2 mg, 0.264 mmol, 150 mol%) and imidazole (20 mg, 0.264 mmol, 150 mol%) in THF (0.6 mL) was added iodine (67 mg, 0.264 mmol, 150 mol%) at 0 °C. After 20 min, a solution of alcohol **13** (100 mg, 7/1 dr, 0.176 mmol, 100 mol%) in THF (0.6 mL) was added dropwise. The reaction was allowed to warm to room temperature and was stirred for 24 hours. The reaction mixture was diluted with  $\text{Et}_2\text{O}$  and  $\text{NaHCO}_3$  (aq., sat., 1 mL) and  $\text{Na}_2\text{S}_2\text{O}_3$  (aq., sat., 1 mL) were added. The reaction mixture was transferred to a separatory funnel, and the aqueous phase was extracted with  $\text{Et}_2\text{O}$ . The combined organic extracts were washed with brine, and dried ( $\text{Na}_2\text{SO}_4$ ). The solvent was removed under reduced pressure and the residue was subjected to flash column chromatography on silica gel (hexanes). The title compound **14** was obtained as a colorless oil (85.7 mg, 0.127 mmol) in 72% yield as a single diastereomer.

**$^1\text{H NMR}$**  (500 MHz,  $\text{CDCl}_3$ )  $\delta$  5.01 (s, 1H), 4.63 (s, 1H), 4.03 (d,  $J = 10.4$  Hz, 1H), 3.81 (d,  $J = 10.4$  Hz, 1H), 3.65 – 3.59 (m, 1H), 3.53 – 3.46 (m, 1H), 3.05 (t,  $J = 10.6$  Hz, 1H), 2.41 (d,  $J = 12.7$  Hz, 1H), 2.12 (d,  $J = 11.1$  Hz, 1H), 1.98 – 1.76 (m, 4H), 1.67 (dd,  $J = 9.7, 6.5$  Hz, 2H), 1.41 – 1.31 (m, 1H), 1.15 (s, 3H), 1.12 – 1.02 (m, 42H), 0.82 (s, 3H).

**$^{13}\text{C NMR}$**  (125 MHz,  $\text{CDCl}_3$ )  $\delta$  146.1, 108.0, 80.1, 65.0, 60.7, 55.6, 44.9, 41.4, 38.7, 37.8, 28.3, 26.7, 23.7, 18.5, 18.4, 18.3, 18.2, 14.2, 13.1, 12.1, 2.3.

**R<sub>f</sub>** 0.7 (hexanes, UV/ $\text{KMnO}_4$ )

**HRMS** (ESI) Calcd. for  $(\text{M})^+$  677.3646, found: 677.3629.

**FTIR** (neat): 2942, 2891, 2865, 1462, 1096, 1057, 882, 678  $\text{cm}^{-1}$ .

**Optical Rotation**  $[\alpha]_{\text{D}}^{24} = -42^\circ$  ( $c = 0.70$ ,  $\text{CHCl}_3$ )

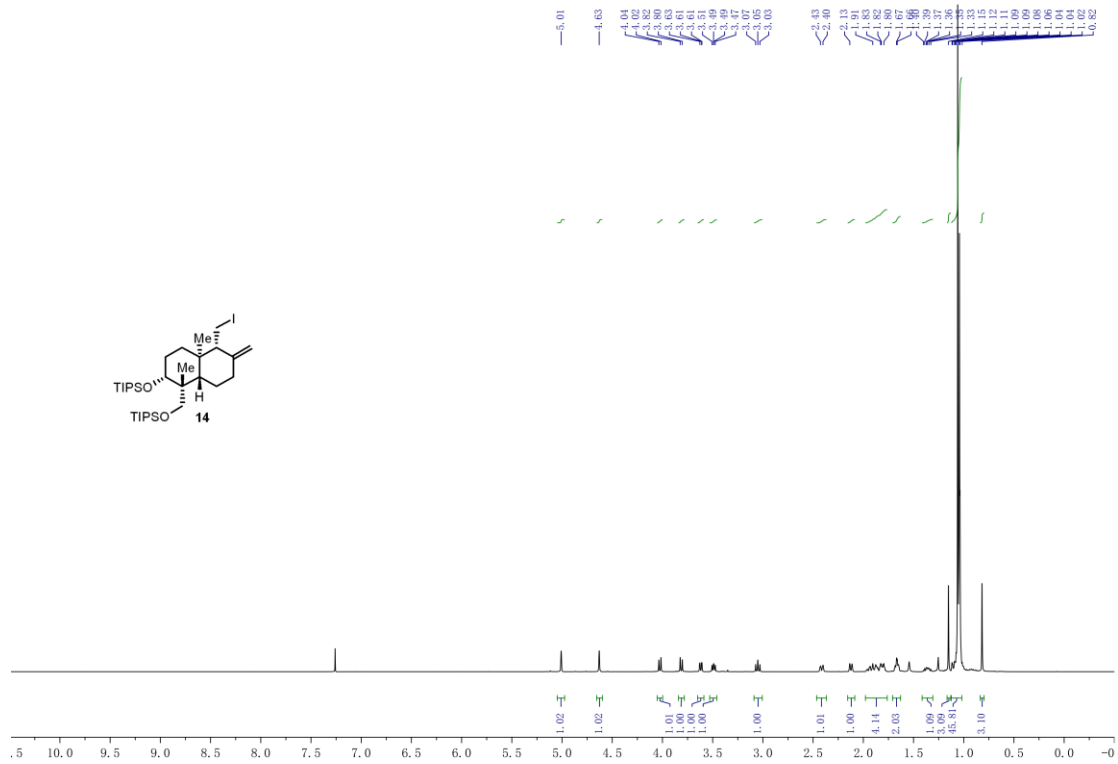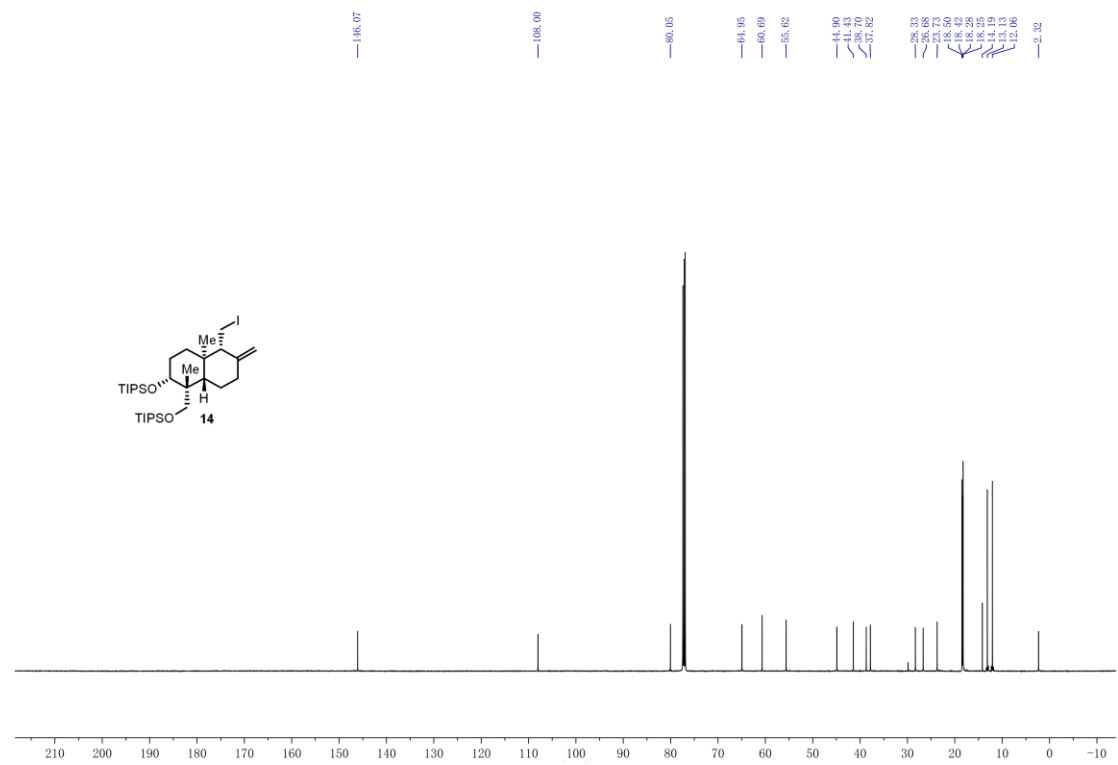

**(*R,E*)-3-Bromo-5-((1*R*,4*aS*,5*R*,6*R*,8*aS*)-5,8*a*-dimethyl-2-methylene-6-((triisopropylsilyl)oxy)-5-(((triisopropylsilyl)oxy)methyl)decahydronaphthalen-1-yl)pent-3-ene-1,2-diol (**16**)**

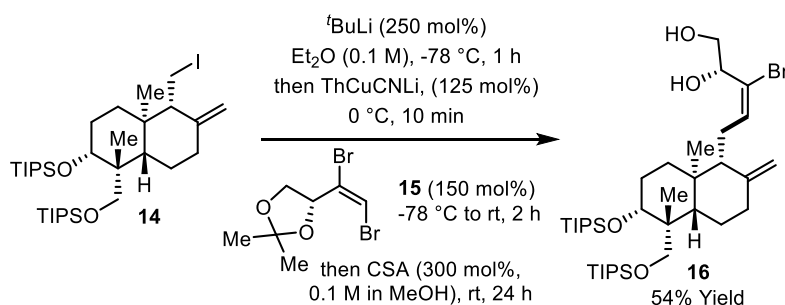

### Detailed Procedures

Following the known procedure to prepare  $\text{ThCuCNLi}$ ,<sup>4</sup> a 10-mL round-bottomed flask equipped with a stirring bar and a rubber septum was evacuated and flame-dried under vacuum, then flushed with dry argon. This process was repeated 3 times. Anhydrous THF (3.6 mL) and distilled thiophene (291  $\mu\text{L}$ , 3.63 mmol, 110 mol%) were injected via syringe and the resulting solution was cooled to  $-78\text{ }^\circ\text{C}$ . Butyllithium (2.5 M in hexanes, 1.45 mL, 3.63 mmol, 110 mol%) was added dropwise via syringe. The resulting light-yellow solution was warmed to  $-20\text{ }^\circ\text{C}$  and stirred for 20 min. Another 10-mL round-bottomed flask equipped with a stirring bar and a rubber septum was charged with copper(I) cyanide (295 mg, 3.3 mmol, 100 mol%). The flask was evacuated and gently flame-dried under vacuum, then flushed with dry argon. The process was repeated 3 times. Anhydrous THF (3.3 mL) was injected and the resulting slurry was cooled to  $-78\text{ }^\circ\text{C}$ . At this time, the previously prepared solution of 2-lithiothiophene in THF (at  $-20\text{ }^\circ\text{C}$ ) was added via cannula to the stirring slurry. At the end of the addition, the acetone–dry ice bath was exchanged for an ice bath. After 5 min, the flask was again placed in a dry ice–acetone bath.

A solution of **14** (48 mg, 0.071 mmol, 100 mol%) in 0.7 mL of  $\text{Et}_2\text{O}$  at  $-78\text{ }^\circ\text{C}$  was treated with  $t\text{-BuLi}$  (104  $\mu\text{L}$  of 1.7 M in pentane, 0.18 mmol, 250 mol%) dropwise over 2 min. After 1 h, freshly prepared  $\text{ThCuCNLi}$  (222  $\mu\text{L}$  of 0.4 M in THF, 0.089 mmol, 125 mol%) was added and the mixture was immediately warmed to  $0\text{ }^\circ\text{C}$ . After 5 min, the reaction was cooled to  $-78\text{ }^\circ\text{C}$  and a solution of **15** (30.5 mg, 0.106 mmol, 150 mol%) in 0.3 mL of  $\text{Et}_2\text{O}$  was added dropwise over 5 min, and the mixture was stirred at  $-78\text{ }^\circ\text{C}$  for 10 min, warmed to  $0\text{ }^\circ\text{C}$ , and then stirred at  $0\text{ }^\circ\text{C}$  for 2 h. The reaction was warm to room temperature, and a solution of (+)-10-camphorsulfonic acid (CSA, 50 mg, 0.215 mmol, 300 mol%) in 2.1 mL of MeOH was added. Then the resulting mixture was stirred for 24 h.  $\text{NaHCO}_3$  (aq., sat., 1 mL) was added and the reaction mixture was transferred to a separatory funnel and extracted with ethyl acetate. The combined organic extracts were washed with brine and dried ( $\text{Na}_2\text{SO}_4$ ). The solvent was removed under reduced pressure and the residue was subjected to flash column chromatography on silica gel (hexanes/ethyl acetate = 5/1). The title compound **16** was obtained as a colorless oil (27.6 mg, 0.038 mmol) in 54% yield.

**<sup>1</sup>H NMR** (500 MHz,  $\text{CDCl}_3$ )  $\delta$  6.04 (t,  $J = 6.8\text{ Hz}$ , 1H), 4.88 (s, 1H), 4.57 (d,  $J = 5.1\text{ Hz}$ , 1H), 4.45 (s, 1H), 4.04 (d,  $J = 10.4\text{ Hz}$ , 1H), 3.82 (d,  $J = 10.4\text{ Hz}$ , 1H), 3.77 – 3.69 (m, 1H), 3.62 (s,



1H), 3.51 – 3.42 (m, 1H), 2.40 – 2.30 (m, 2H), 2.28 – 2.20 (m, 1H), 2.16 (d,  $J = 5.7$  Hz, 1H), 1.92 – 1.78 (m, 4H), 1.76 – 1.63 (m, 4H), 1.56 (s, 2H), 1.15 (s, 3H), 1.08 – 1.01 (m, 42H), 0.82 (s, 3H).

**<sup>13</sup>C NMR** (125 MHz, CDCl<sub>3</sub>)  $\delta$  147.9, 137.4, 124.0, 107.8, 80.2, 70.2, 65.6, 65.0, 57.0, 55.8, 44.8, 39.5, 39.1, 37.8, 28.4, 26.6, 25.0, 23.8, 18.5, 18.4, 18.3, 18.3, 14.9, 13.1, 12.1.

**Rf** 0.30 (hexanes/ethyl acetate = 2/1, KMnO<sub>4</sub>)

**HRMS** (ESI) Calcd. for (M+Na)<sup>+</sup> 737.3966, found: 737.3968.

**FTIR** (neat): 3288, 2941, 2865, 1462, 1098, 1057, 1009, 881, 803 cm<sup>-1</sup>.

**Optical Rotation**  $[\alpha]_D^{23} = +6^\circ$  ( $c = 0.17$ , CHCl<sub>3</sub>)

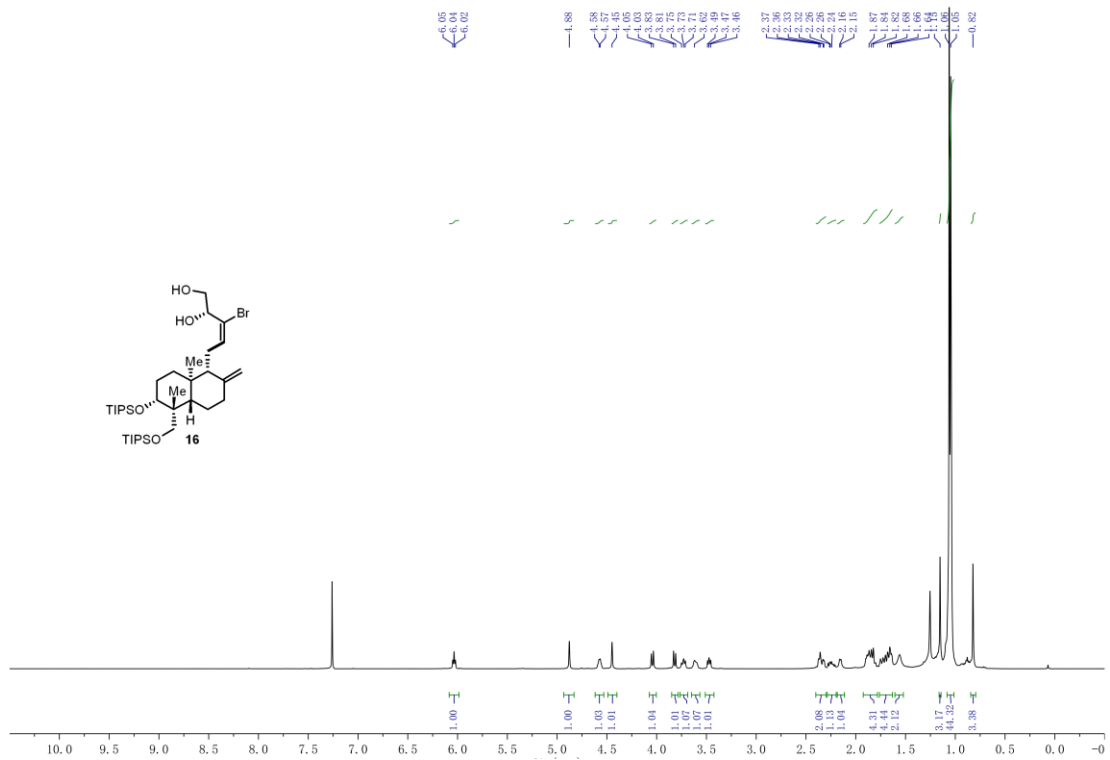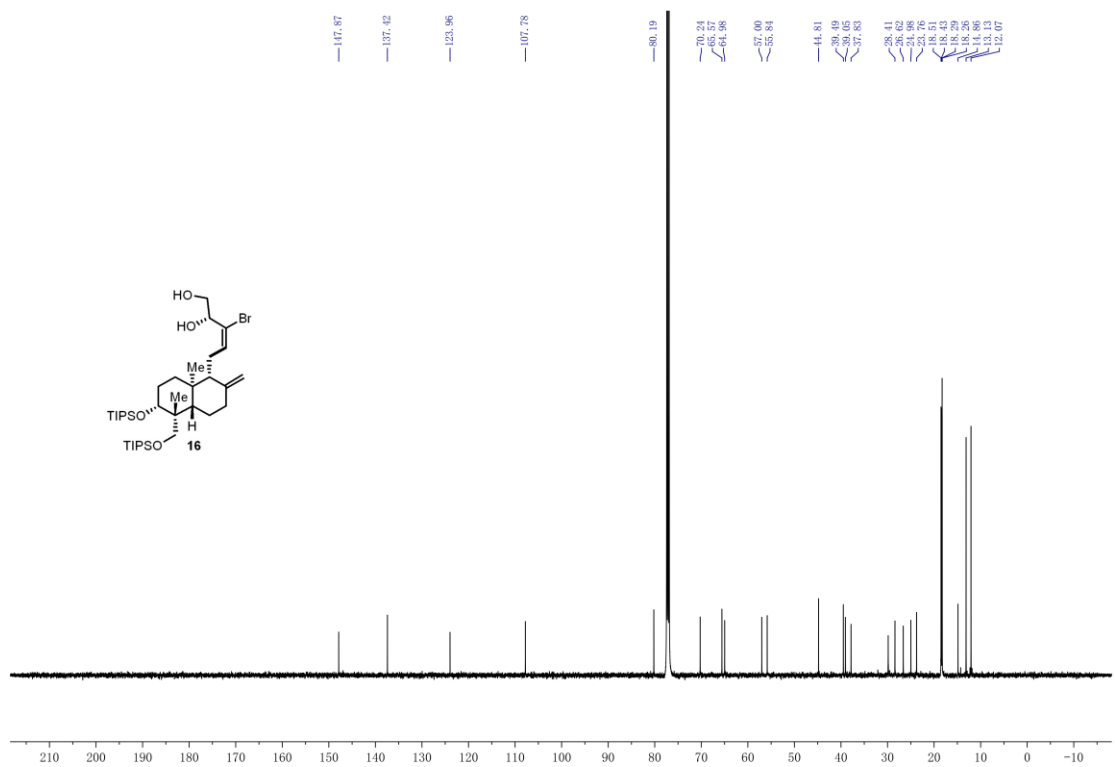

### (S)-But-3-yne-1,2-diol (S2)

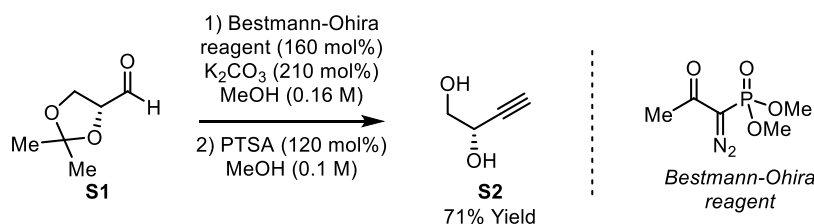

### Detailed Procedures

A solution of (*R*)-glyceraldehyde acetonide **S1** (2.06 g, 15.8 mmol, 100 mol%) and the Bestmann–Ohira reagent (4.55 g, 23.7 mmol, 150 mol%) in methanol (100 mL) was cooled to 0 °C. Anhydrous potassium carbonate (4.58 g, 33.2 mmol, 210 mol%) was gradually added (30 min). The mixture was stirred for 12 h, allowing it to warm to room temperature. The reaction was diluted with Et<sub>2</sub>O (150 mL) and transferred to a separatory funnel. The organic layer was washed with NH<sub>4</sub>Cl (aq., sat., 50 mL). The two layers were separated and the aqueous phase was extracted with Et<sub>2</sub>O (2 × 50 mL). The combined organic extracts were washed with brine, and dried (Na<sub>2</sub>SO<sub>4</sub>). To the resulting solution of crude product was added MeOH (100 mL) and PTSA (3.27 g, 19.0 mmol, 120 mol%) at room temperature. The reaction mixture was allowed to stir overnight. Triethylamine (2.6 mL) was added and the solvent was removed under reduced pressure. The residue was subjected to flash column chromatography on silica gel (pentane/diethyl ether = 1/1 to 0/1). The title compound **S2** was obtained as a yellow oil (966 mg, 11.2 mmol,) in 71% yield.

**<sup>1</sup>H NMR** (400 MHz, CDCl<sub>3</sub>) δ 4.46 (ddd, *J* = 6.2, 3.7, 2.2 Hz, 1H), 3.77 (dd, *J* = 11.4, 3.8 Hz, 1H), 3.71 (dd, *J* = 11.4, 6.3 Hz, 1H), 2.50 (t, *J* = 6.2 Hz, 1H), 2.43 (s, 2H).

The spectral data recorded for the compound was in complete agreement with the literature.<sup>5</sup>

**(*R,E*)-3,4-Dibromobut-3-ene-1,2-diol (**S3**)**

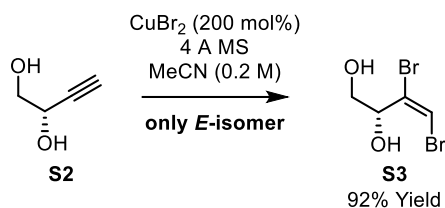

**Detailed Procedures**

Following the modified procedure,<sup>6</sup>  $\text{CuBr}_2$  (1.72 g, 7.71 mmol, 200 mol%) was added to a solution of alkyne **S2** (332 mg, 3.85 mmol, 100 mol%) and 200 mg of 4 Å molecular sieves in acetonitrile (19 mL) at room temperature. The reaction mixture was allowed to stir at room temperature for 4 h. The reaction mixture was concentrated and the residue was subjected to chromatography on silica gel (pentane/diethyl ether = 2/1 to 1/1) to afford the compound **S3** as a colorless oil (900 mg, 3.54 mmol) in 92% yield.

**<sup>1</sup>H NMR** (500 MHz,  $\text{CDCl}_3$ )  $\delta$  6.65 (s, 1H), 4.89 (dd,  $J = 7.7, 4.6$  Hz, 1H), 3.74 (dd,  $J = 11.3, 7.7$  Hz, 1H), 3.69 (dd,  $J = 11.4, 4.6$  Hz, 1H), 2.39 (s, 2H).

**<sup>13</sup>C NMR** (125 MHz,  $\text{CDCl}_3$ )  $\delta$  126.3, 105.1, 71.3, 64.6.

**Rf** 0.34 (hexanes/ethyl acetate = 1/1, UV/ $\text{KMnO}_4$ )

**HRMS** (ESI) Calcd. for  $(\text{M}+\text{Na})^+$  266.8627, found: 266.8623.

**FTIR** (neat): 3357, 3080, 2930, 1398, 1320, 1247, 1032, 883, 793  $\text{cm}^{-1}$ .

**Optical Rotation**  $[\alpha]_{\text{D}}^{24} = +12^\circ$  ( $c = 0.51$ ,  $\text{CHCl}_3$ )

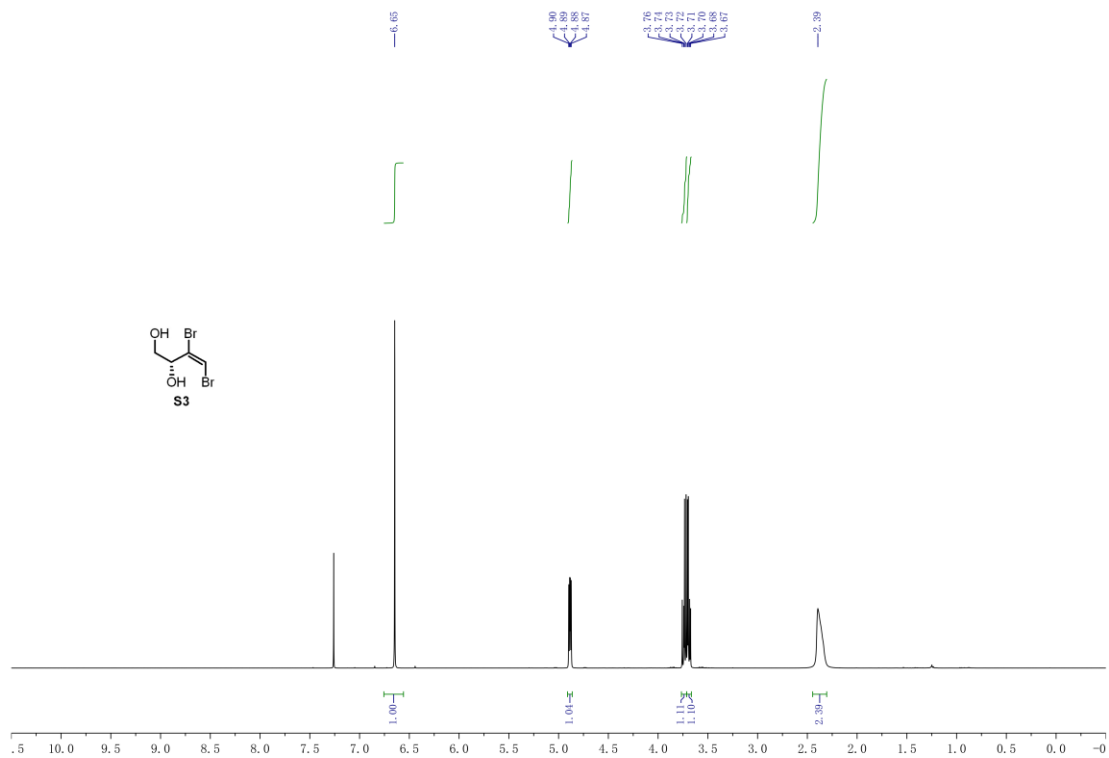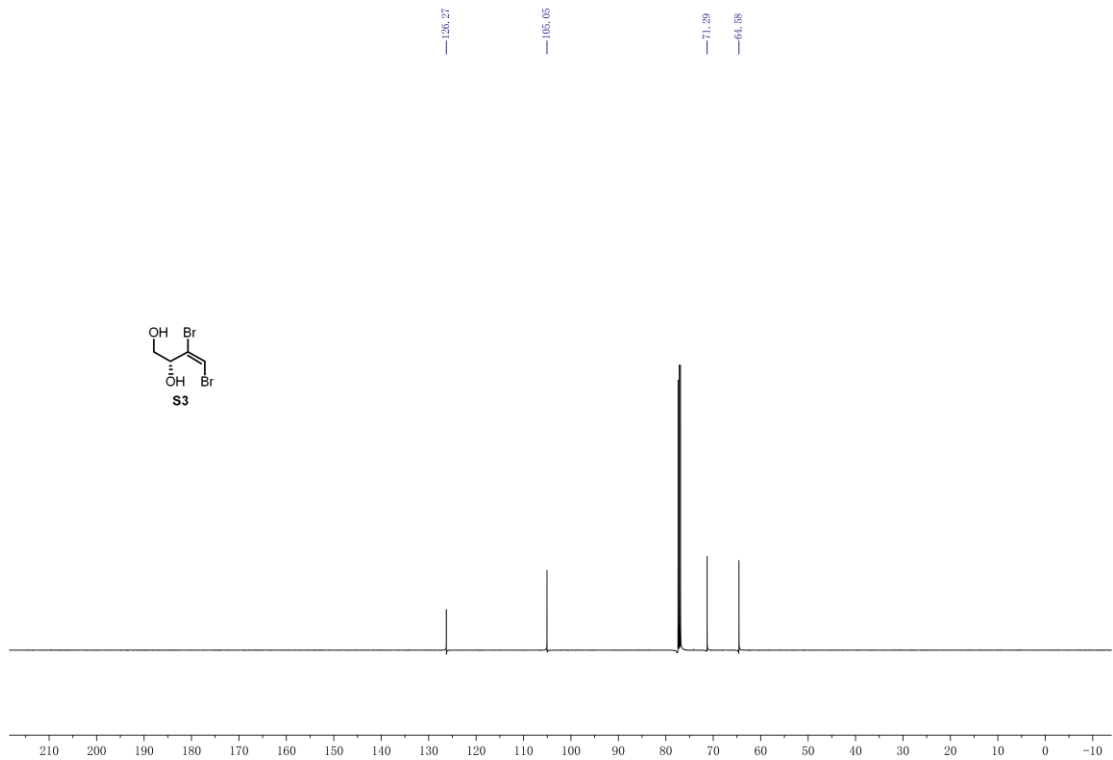

**(*R,E*)-4-(1,2-Dibromovinyl)-2,2-dimethyl-1,3-dioxolane (S4)**

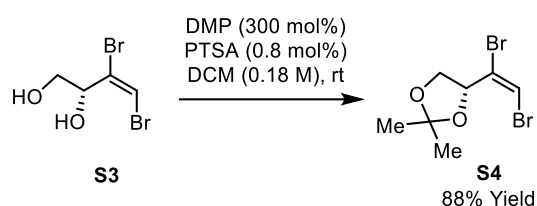

**Detailed Procedures**

To a solution of **S3** (905 mg, 3.68 mmol, 100 mol%) in DCM (20 mL) was added 2,2-dimethoxypropane (DMP, 1.35 mL, 11.0 mmol, 300 mol%) and PTSA (5 mg, 0.03 mmol, 0.8 mol%) at room temperature. The reaction mixture was allowed to stir for 1.5 hours at room temperature. NaHCO<sub>3</sub> (aq., sat., 10 mL) was added to the reaction mixture. The reaction mixture was transferred to a separatory funnel and the aqueous layer was extracted with DCM (20 mL × 2). The combined organic extracts were washed with brine (10 mL) and dried (Na<sub>2</sub>SO<sub>4</sub>). The solvent was removed under reduced pressure (<30 °C) and the residue was subjected to flash column chromatography on silica gel (pentane/diethyl ether = 20/1 to 10/1) to afford compound **S4** as a colorless oil (919 mg, 3.24 mmol) in 88% yield.

**<sup>1</sup>H NMR** (400 MHz, CDCl<sub>3</sub>) δ 6.65 (d, *J* = 0.6 Hz, 1H), 5.19 (dt, *J* = 6.7, 3.4 Hz, 1H), 4.17 (dd, *J* = 8.4, 6.7 Hz, 1H), 3.83 (dd, *J* = 8.5, 6.8 Hz, 1H), 1.55 (s, 4H), 1.42 (s, 3H).

**<sup>13</sup>C NMR** (125 MHz, CDCl<sub>3</sub>) δ 125.4, 111.2, 105.9, 74.5, 67.8, 26.3, 25.9.

**R<sub>f</sub>** 0.48 (hexanes/ethyl acetate = 10/1, UV/KMnO<sub>4</sub>)

**HRMS** (CI) Calcd. for (M)<sup>+</sup> 284.9126, found: 284.9127.

**FTIR** (neat): 3084, 2987, 2934, 1454, 1380, 1372, 1250, 1153, 1213, 1103, 1064, 850 cm<sup>-1</sup>.

**Optical Rotation** [ $\alpha$ ]<sub>D</sub><sup>23</sup> = +14° (*c* = 0.22, CHCl<sub>3</sub>)

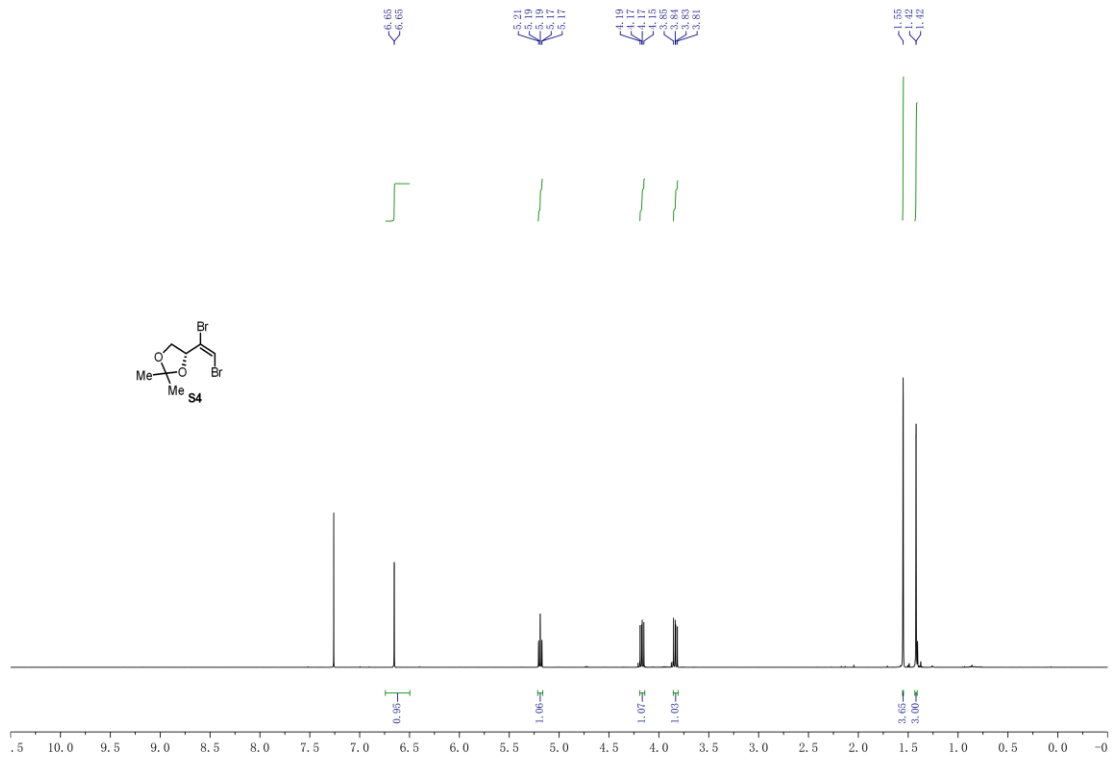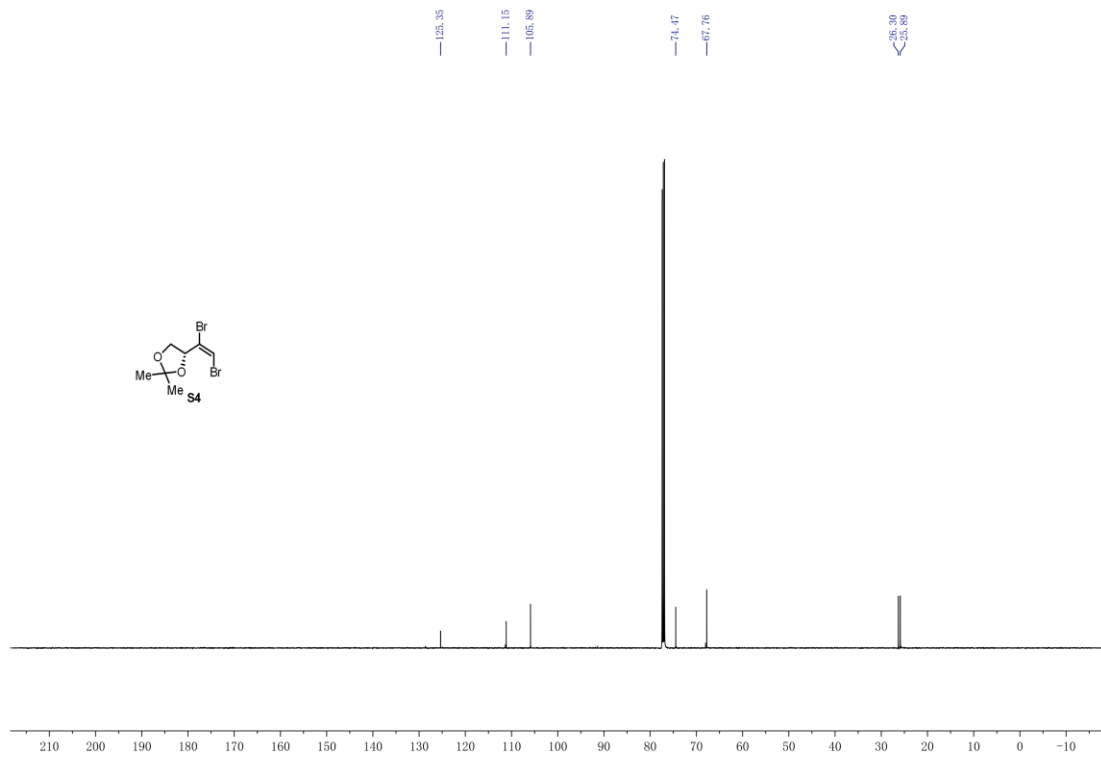

**(*S,E*)-3-(2-((1*R*,4*aS*,5*R*,6*R*,8*aS*)-5,8*a*-Dimethyl-2-methylene-6-((triisopropylsilyl)oxy)-5-(((triisopropylsilyl)oxy)methyl)decahydronaphthalen-1-yl)ethylidene)-4-hydroxydihydrofuran-2(3*H*)-one (17)**

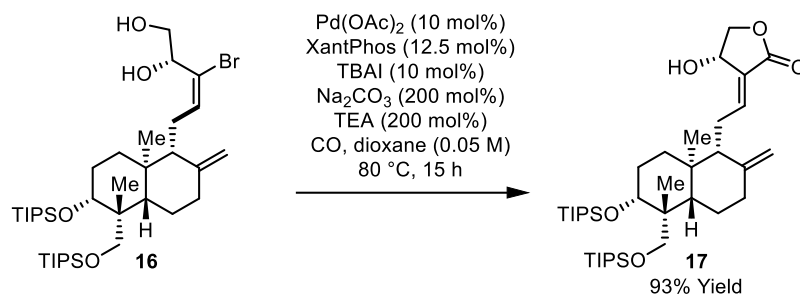

**Detailed Procedures**

Following the modified procedure,<sup>7</sup> an oven dried Schlenk tube fitted with a Youngs tap was charged with alcohol **16** (14.2 mg, 0.02 mmol, 100 mol%),  $\text{Pd(OAc)}_2$  (0.4 mg, 0.002 mmol, 10 mol%),  $\text{XantPhos}$  (1.5 mg, 0.0025 mmol, 13 mol%), tetra-*n*-butylammonium iodide (0.7 mg, 0.002 mmol, 10 mol%), and  $\text{Na}_2\text{CO}_3$  (4.2 mg, 0.04 mmol, 200 mol%) under an argon atmosphere. Dry 1,4-dioxane (0.4 mL) was then added to the tube, and the solvent was degassed by a freeze-pump-thaw method (3 cycles). The tube was then backfilled with CO gas and dry  $\text{NEt}_3$  (5.5  $\mu\text{L}$ , 0.04 mmol, 200 mol%) was added. Then, whilst stirring vigorously, the tube was evacuated and back filled with CO gas three times, turning the mixture a deep purple color. The tube was then sealed and heated to  $80\text{ }^\circ\text{C}$  whilst stirring vigorously for 15 h. The reaction mixture was allowed to cool to room temperature. The solvent was removed under reduced pressure. The crude residue was subjected to flash column chromatography (hexanes/acetone = 5/1) to give lactone **17** as a colorless oil (12.2 mg, 0.017 mmol) in 93% yield.

**<sup>1</sup>H NMR** (500 MHz,  $\text{CDCl}_3$ )  $\delta$  7.00 (t,  $J = 6.8$  Hz, 1H), 5.03 (s, 1H), 4.89 (s, 1H), 4.56 (s, 1H), 4.45 (dd,  $J = 10.4, 5.9$  Hz, 1H), 4.26 (d,  $J = 10.4$  Hz, 1H), 4.05 (d,  $J = 10.5$  Hz, 1H), 3.83 (d,  $J = 10.4$  Hz, 1H), 3.49 (dd,  $J = 10.5, 5.4$  Hz, 1H), 2.61 – 2.48 (m, 2H), 2.43 – 2.32 (m, 1H), 2.02 (d,  $J = 6.4$  Hz, 1H), 1.94 – 1.78 (m, 4H), 1.78 – 1.63 (m, 3H), 1.22 – 1.17 (m, 1H), 1.16 (s, 3H), 1.08 – 1.03 (m, 42H), 0.87 (s, 3H).

**<sup>13</sup>C NMR** (125 MHz,  $\text{CDCl}_3$ )  $\delta$  170.0, 149.6, 148.0, 127.9, 107.9, 80.2, 74.3, 66.4, 65.0, 56.6, 55.8, 44.8, 39.5, 38.9, 38.0, 28.4, 26.6, 25.1, 23.8, 18.5, 18.4, 18.3, 18.3, 14.8, 13.1, 12.1.

**R<sub>f</sub>** 0.41 (hexanes/ethyl acetate = 2/1, UV/ $\text{KMnO}_4$ )

**HRMS** (ESI) Calcd. for  $(\text{M}+\text{Na})^+$  685.4654, found: 685.4653.

**FTIR** (neat): 3434, 2936, 1759, 1467, 1370, 1162, 1082, 1020, 965  $\text{cm}^{-1}$ .

**Optical Rotation**  $[\alpha]_D^{23} = -59^\circ$  ( $c = 0.11$ ,  $\text{CHCl}_3$ )



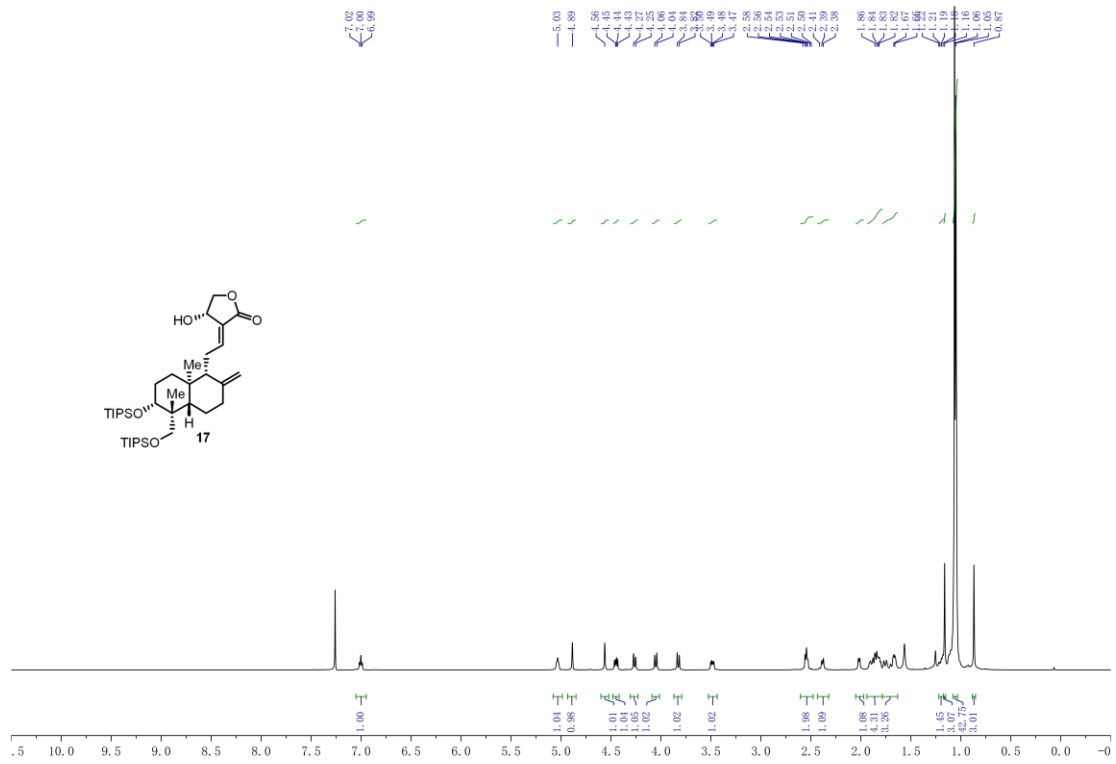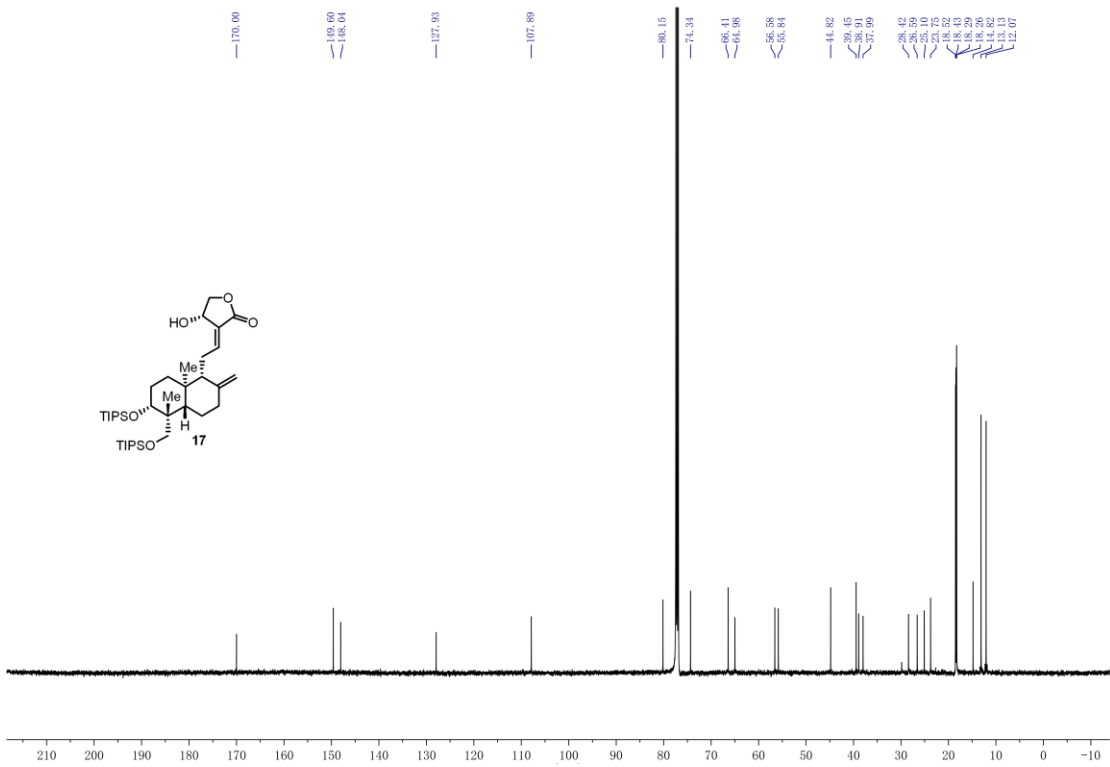

## Andrographolide

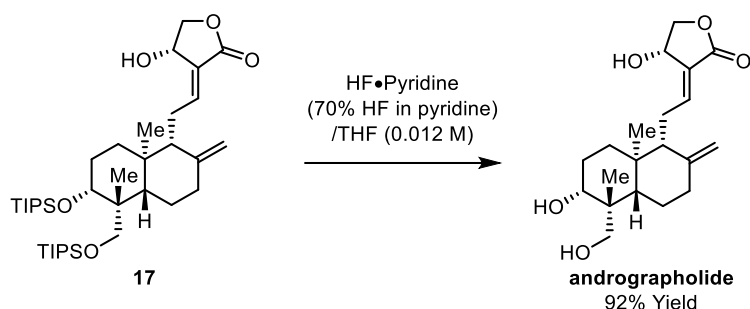

### Detailed Procedures

To a solution of **17** (11.8 mg, 0.018 mmol, 100 mol%) in THF (0.5 mL) was added hydrogen fluoride•pyridine (70% HF in pyridine, 497  $\mu$ L) at 0 °C. Then the reaction mixture was allowed to warm to room temperature and was stirred for 34 hours. The reaction mixture was diluted with ethyl acetate and NaHCO<sub>3</sub> (aq., sat., 5 mL) was added. The reaction mixture was transferred to separatory funnel and the aqueous phase was extracted with ethyl acetate. The combined organic extracts were washed with brine and dried (Na<sub>2</sub>SO<sub>4</sub>). The solvent was removed under reduced pressure and the residue was subjected to flash column chromatography on silica gel (DCM/MeOH = 20/1 to 15/1). The title compound **andrographolide** was obtained as colorless plates (5.7 mg, 0.0166 mmol) in 92% yield.

**<sup>1</sup>H NMR** (500 MHz, CD<sub>3</sub>OD)  $\delta$  6.75 (td,  $J$  = 6.8, 1.5 Hz, 1H), 4.91 (d,  $J$  = 6.0 Hz, 1H), 4.79 (s, 1H), 4.57 (s, 1H), 4.37 (dd,  $J$  = 10.2, 6.1 Hz, 1H), 4.06 (dd,  $J$  = 10.2, 2.0 Hz, 1H), 4.02 (d,  $J$  = 11.0 Hz, 1H), 3.27 (d,  $J$  = 11.0 Hz, 1H), 3.32 – 3.19 (m, 1H), 2.58 – 2.43 (m, 2H), 2.36 – 2.30 (m, 1H), 1.98 – 1.90 (m, 1H), 1.83 – 1.64 (m, 5H), 1.28 – 1.18 (m, 4H), 1.12 (s, 3H), 0.66 (s, 3H).

**<sup>13</sup>C NMR** (125 MHz, CD<sub>3</sub>OD)  $\delta$  172.67, 149.36, 148.80, 129.84, 109.24, 80.94, 76.17, 66.67, 65.00, 57.42, 56.35, 43.71, 39.99, 39.00, 38.16, 29.06, 25.73, 25.24, 23.40, 15.55.

**R<sub>f</sub>** 0.32 (DCM/MeOH = 10/1, UV/KMnO<sub>4</sub>)

**HRMS** (ESI) Calcd. for (M+Na)<sup>+</sup> 373.1985, found: 373.1989.

**FTIR** (neat): 3483, 3417, 2951, 1732, 1673, 1464, 1058, 838, 779 cm<sup>-1</sup>.

**MP** 229-231 °C

**Optical Rotation**  $[\alpha]_D^{26} = -105^\circ$  ( $c = 0.19$ , MeOH)

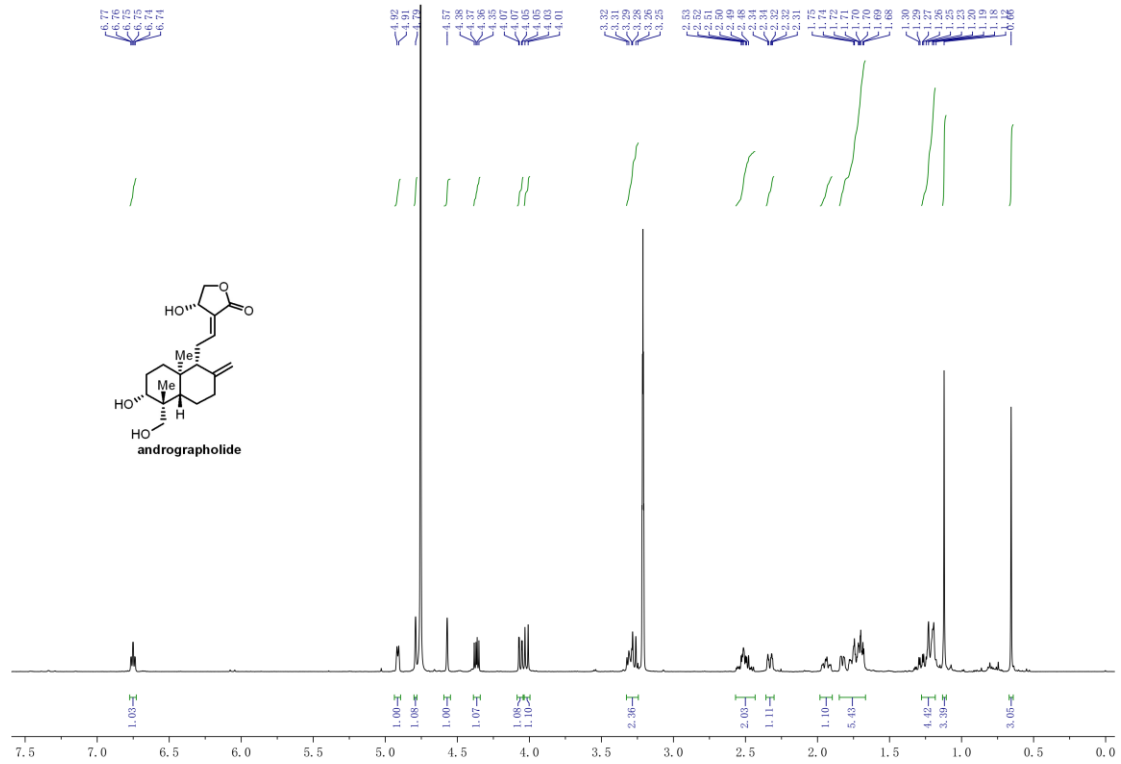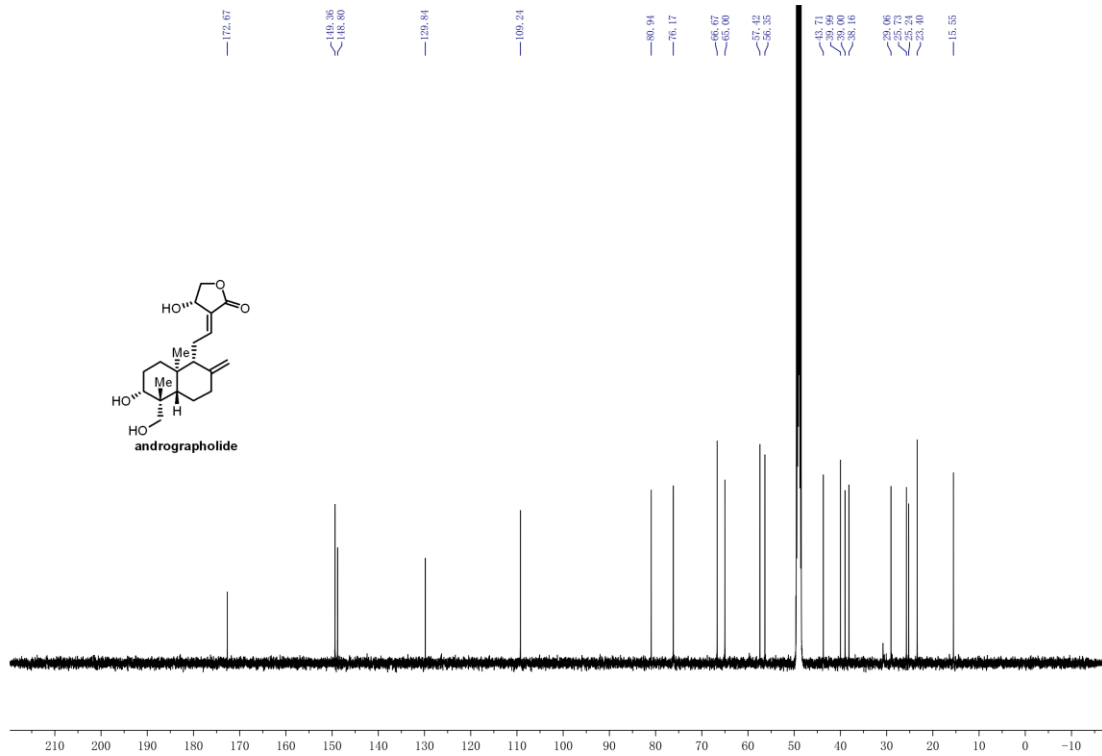

## Detailed Procedures and Spectral Data for Asymmetric Synthesis of 14-Hydroxycolladonin

### **((4a*S*,5*R*,6*R*,8a*R*)-1-(Hydroxymethyl)-5,8a-dimethyl-6-((triisopropylsilyl)oxy)-5-(((triisopropylsilyl)oxy)methyl)-3,4,4a,5,6,7,8,8a-octahydronaphthalen-2-yl)methyl methyl carbonate (**18**)**

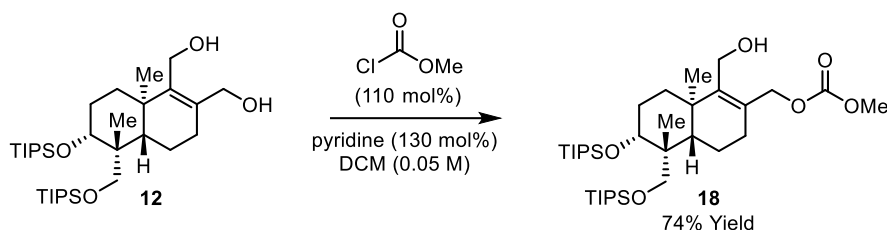

### Detailed Procedures

To a solution of **12** (146 mg, 0.25 mmol, 100 mol%) in DCM (5 mL) was added pyridine (24  $\mu$ L, 0.30 mmol, 130 mol%) and methyl chloroformate (20  $\mu$ L, 0.26 mmol, 110 mol%) at -20 °C. The reaction mixture was allowed to stir for 8 hours at the same temperature, then warmed to 0 °C and stirred for 4 hours. MeOH (50  $\mu$ L) was added to the reaction mixture. The solvent was removed under reduced pressure, and the residue was subjected to flash column chromatography on silica gel (hexanes/ethyl acetate = 5/1) to afford the title compound **18** as a colorless oil (119.2 mg, 0.18 mmol) in 74% yield.

**<sup>1</sup>H NMR** (500 MHz, CDCl<sub>3</sub>)  $\delta$  4.85 (d,  $J$  = 11.9 Hz, 1H), 4.62 (d,  $J$  = 11.9 Hz, 1H), 4.27 (d,  $J$  = 12.1 Hz, 1H), 4.09 (d,  $J$  = 10.6 Hz, 1H), 4.01 (d,  $J$  = 12.1 Hz, 1H), 3.82 (d,  $J$  = 10.5 Hz, 1H), 3.79 (s, 3H), 3.48 (dd,  $J$  = 11.3, 4.9 Hz, 1H), 2.17 – 1.99 (m, 2H), 1.98 – 1.88 (m, 2H), 1.84 – 1.67 (m, 3H), 1.45 (td,  $J$  = 13.2, 4.1 Hz, 1H), 1.18 (s, 3H), 1.13 (s, 3H), 1.07 – 1.04 (m, 42H), 0.94 – 0.87 (m, 1H).

**<sup>13</sup>C NMR** (125 MHz, CDCl<sub>3</sub>)  $\delta$  156.2, 147.2, 130.2, 80.1, 69.1, 65.7, 57.4, 55.1, 51.7, 44.5, 38.4, 34.7, 30.9, 28.1, 23.8, 21.0, 20.3, 18.5, 18.4, 18.3, 18.3, 13.1, 12.1.

**R<sub>f</sub>** 0.76 (hexanes/ethyl acetate = 2/1, KMnO<sub>4</sub>)

**HRMS** (ESI) Calcd. for (M+Na)<sup>+</sup> 663.4447, found: 663.4451.

**FTIR** (neat): 2943, 2865, 1748, 1462, 1260, 1100, 1065, 881 cm<sup>-1</sup>.

**Optical Rotation**  $[\alpha]_D^{24} = -41^\circ$  ( $c = 0.23$ , CHCl<sub>3</sub>)

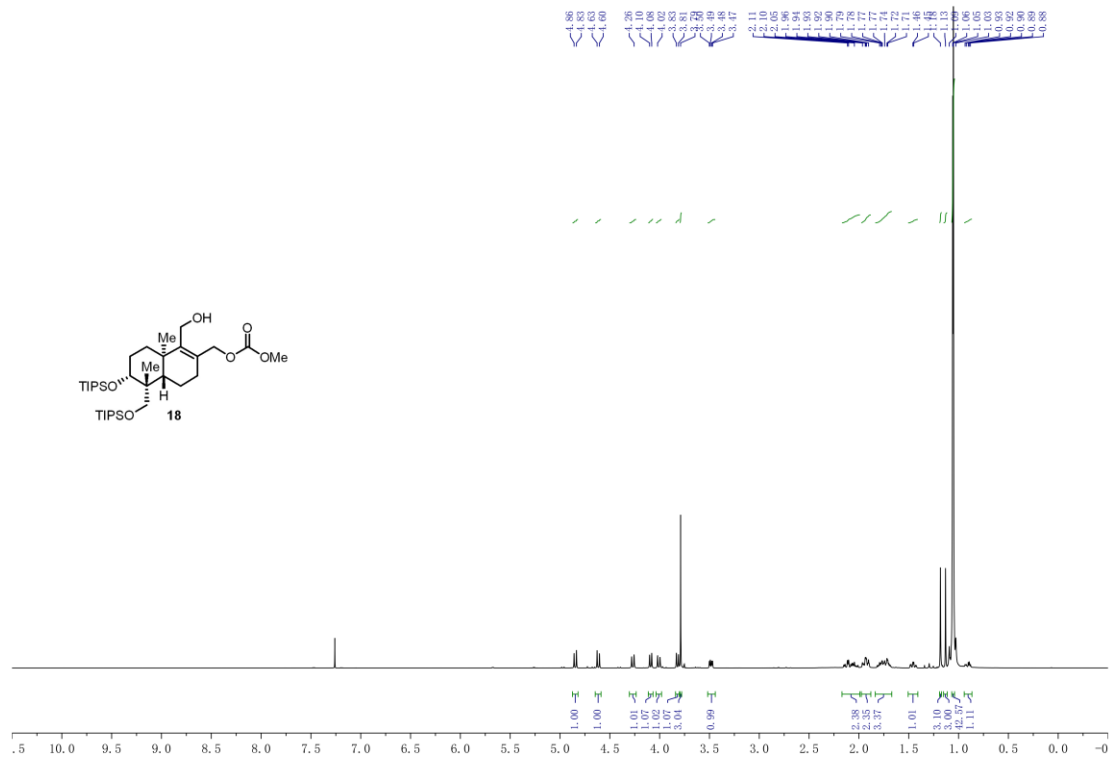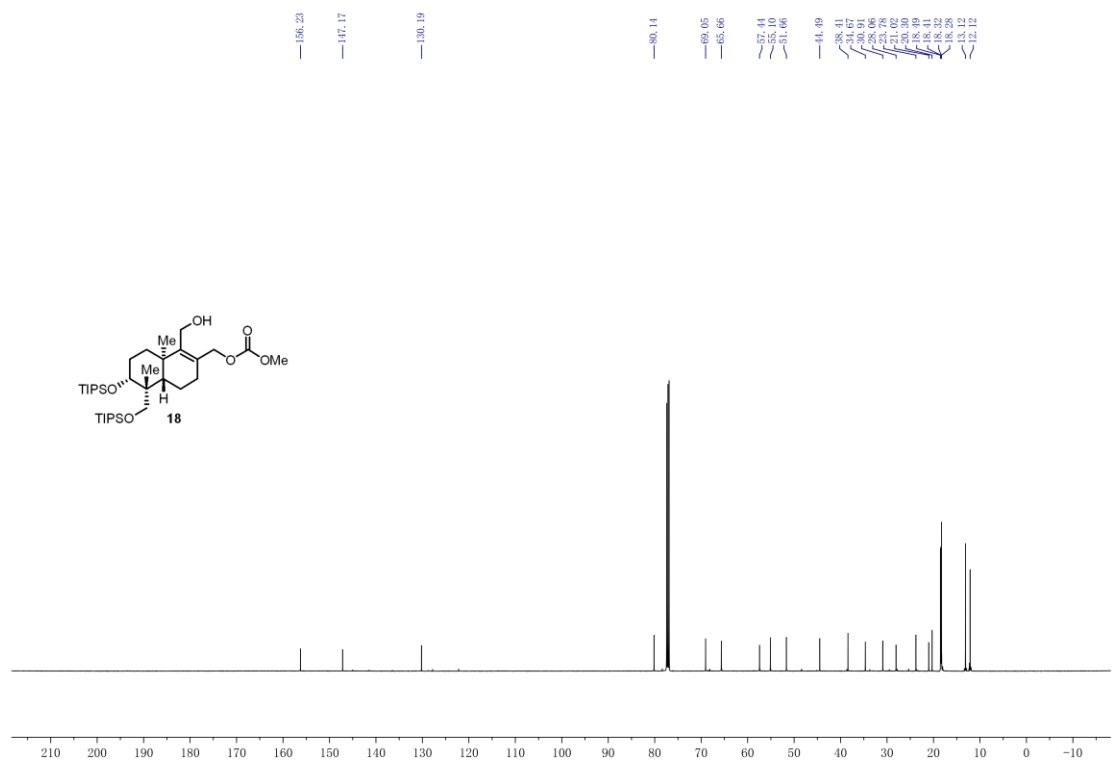

**((4a*S*,5*R*,6*R*,8a*R*)-5,8a-Dimethyl-1-(((2-oxo-2H-chromen-7-yl)oxy)methyl)-6-((triisopropylsilyl)oxy)-5-(((triisopropylsilyl)oxy)methyl)-3,4,4a,5,6,7,8,8a-octahydronaphthalen-2-yl)methyl methyl carbonate (S5)**

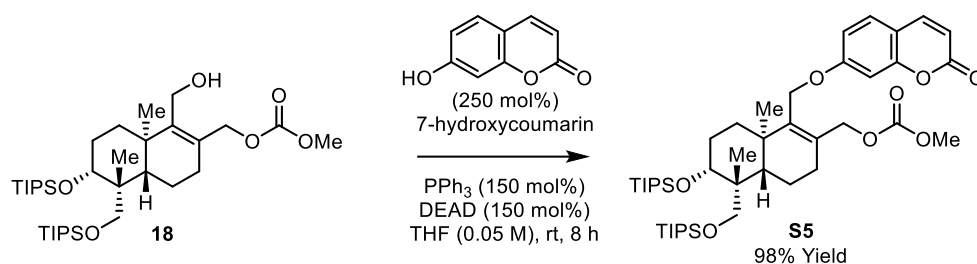

### **Detailed Procedures**

To a solution of **18** (124 mg, 0.19 mmol, 100 mol%), 7-hydroxycoumarin (78 mg, 0.48 mmol, 250 mol%) and PPh<sub>3</sub> (75 mg, 0.29 mmol, 150 mol%) in THF (4 mL) was added DEAD (40 wt. % in toluene, 134  $\mu$ L, 0.29 mmol, 150 mol%) at 0 °C. The resulting mixture was allowed to stir for 8 h at the same temperature. The solvent was removed under reduced pressure and the residue was subjected to flash column chromatography on silica gel (hexanes/ethyl acetate = 5/1). The title compound **S5** was obtained as a colorless oil (149 g, 0.19 mmol) in 98% yield.

**<sup>1</sup>H NMR** (500 MHz, CDCl<sub>3</sub>)  $\delta$  7.63 (d,  $J$  = 9.5 Hz, 1H), 7.37 (d,  $J$  = 9.3 Hz, 1H), 6.89 – 6.82 (m, 2H), 6.26 (d,  $J$  = 9.5 Hz, 1H), 4.74 (d,  $J$  = 12.3 Hz, 1H), 4.63 (d,  $J$  = 10.2 Hz, 1H), 4.52 (d,  $J$  = 12.3 Hz, 1H), 4.43 (d,  $J$  = 10.2 Hz, 1H), 4.09 (d,  $J$  = 10.6 Hz, 1H), 3.83 (d,  $J$  = 10.6 Hz, 1H), 3.76 (s, 3H), 3.51 (dd,  $J$  = 11.4, 4.3 Hz, 1H), 2.31 (dd,  $J$  = 18.0, 5.4 Hz, 1H), 2.13 – 1.97 (m, 2H), 1.84 (ddd,  $J$  = 26.2, 12.5, 5.7 Hz, 1H), 1.78 – 1.63 (m, 3H), 1.48 – 1.40 (m, 1H), 1.21 (s, 3H), 1.20 (s, 3H), 1.08 – 1.04 (m, 43H).

**<sup>13</sup>C NMR** (125 MHz, CDCl<sub>3</sub>)  $\delta$  162.0, 161.3, 156.0, 156.0, 143.5, 141.2, 134.1, 128.9, 113.4, 113.0, 112.9, 101.8, 80.0, 67.8, 65.6, 63.7, 55.0, 51.5, 44.5, 38.4, 34.5, 30.8, 28.0, 23.8, 21.0, 20.4), 18.5, 18.4, 18.3, 18.3, 13.1, 12.1.

**R<sub>f</sub>** 0.27 (hexanes/ethyl acetate = 5/1, UV/KMnO<sub>4</sub>)

**HRMS** (ESI) Calcd. for (M+Na)<sup>+</sup> 807.4658, found: 807.4661.

**FTIR** (neat): 2943, 2865, 1739, 1612, 1463, 1383, 1276, 1196, 1119, 1065, 998 cm<sup>-1</sup>.

**Optical Rotation**  $[\alpha]_{\text{D}}^{24} = -33^{\circ}$  ( $c = 0.21$ , CHCl<sub>3</sub>)

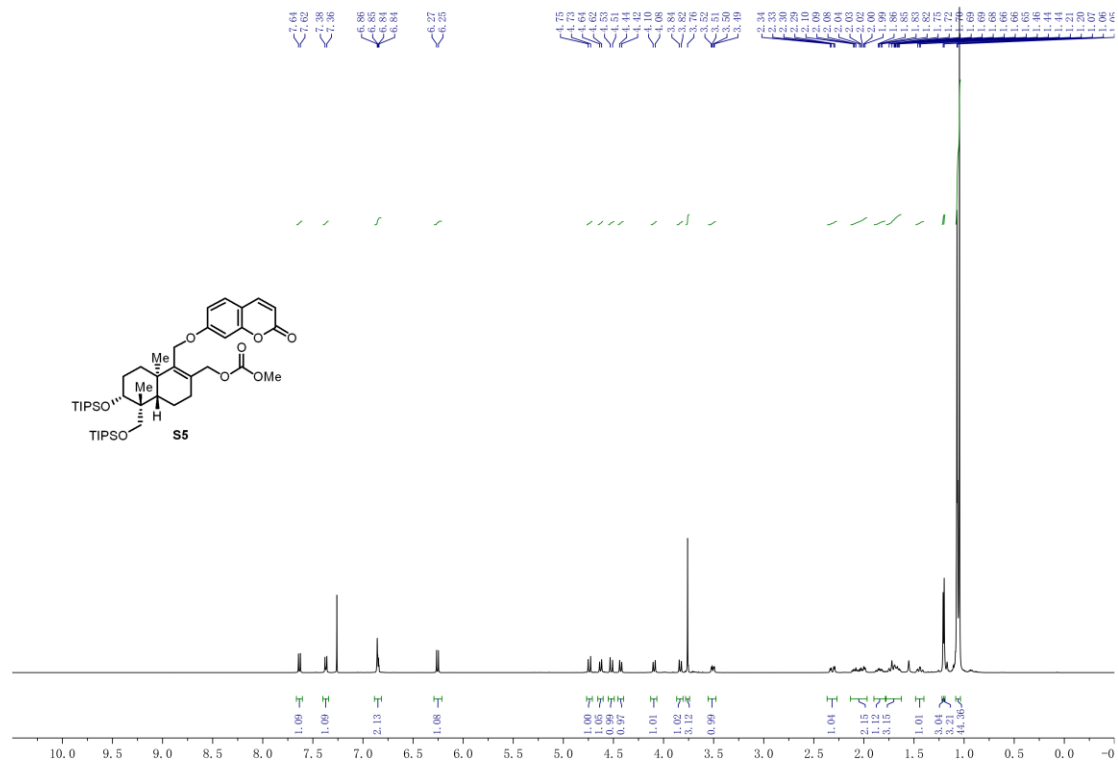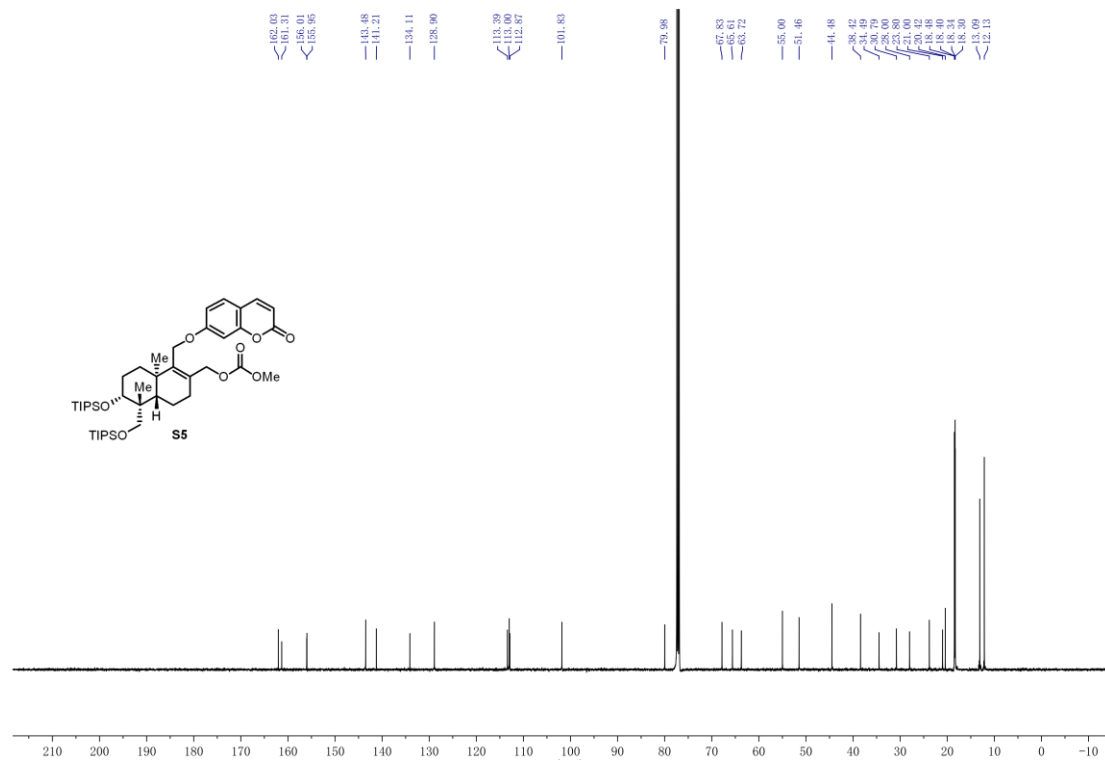

**7-(((1*R*,4*aS*,5*R*,6*R*,8*aR*)-5,8*a*-Dimethyl-2-methylene-6-((triisopropylsilyl)oxy)-5-(((triisopropylsilyl)oxy)methyl)decahydronaphthalen-1-yl)methoxy)-2*H*-chromen-2-one (S6)**

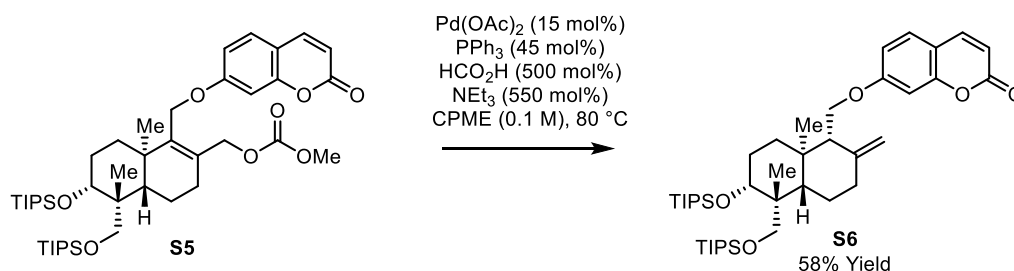

**Detailed Procedures**

**S5** (52.1 mg, 0.066 mmol, 100 mol%), Pd(OAc)<sub>2</sub> (2.2 mg, 0.010 mmol, 15 mol%) and PPh<sub>3</sub> (7.9 mg, 0.030 mmol, 45 mol%) were added to a flame-dried seal tube. The vessel was purged with argon and a solution of triethylamine (51.8 μL, 0.36 mmol, 550 mol%) and formic acid (14.7 μL, 0.033 mmol, 500 mol%) in CPME (0.7 mL) was added. The vessel was sealed and the resulting mixture was allowed to stir at 80 °C for 16 hours. The reaction mixture was allowed to cool to ambient temperature and concentrated under reduced pressure. The residue was subjected to flash column chromatography on silica gel (hexanes/ethyl acetate = 10/1). The title compound **S6** was isolated as a colorless oil (27.2 mg, 0.038 mmol) in 58% yield.

**<sup>1</sup>H NMR** (500 MHz, CDCl<sub>3</sub>) δ 7.63 (d, *J* = 9.5 Hz, 1H), 7.35 (d, *J* = 9.2 Hz, 1H), 6.86 – 6.79 (m, 2H), 6.24 (d, *J* = 9.5 Hz, 1H), 4.90 (s, 1H), 4.52 (s, 1H), 4.24 – 4.14 (m, 2H), 4.08 (d, *J* = 10.5 Hz, 1H), 3.85 (d, *J* = 10.5 Hz, 1H), 3.56 – 3.48 (m, 1H), 2.42 (d, *J* = 12.6 Hz, 1H), 2.19 (s, 1H), 1.99 – 1.85 (m, 3H), 1.84 – 1.78 (m, 1H), 1.76 – 1.64 (m, 2H), 1.42 (td, *J* = 12.8, 4.8 Hz, 1H), 1.19 – 1.14 (m, 1H), 1.18 (s, 3H), 1.06 (m, 42H), 0.96 (s, 3H).

**<sup>13</sup>C NMR** (125 MHz, CDCl<sub>3</sub>) δ 162.5, 161.4, 156.1, 147.1, 143.6, 128.8, 113.3, 113.1, 112.6, 107.3, 101.5, 80.1, 66.0, 65.0, 55.7, 55.4, 44.9, 38.9, 38.7, 37.9, 28.3, 26.3, 23.8, 18.5, 18.4, 18.30, 18.27, 15.9, 13.1, 12.1.

**R<sub>f</sub>** 0.49 (hexanes/ethyl acetate = 5/1, UV/KMnO<sub>4</sub>)

**HRMS** (ESI) Calcd. for (M+Na)<sup>+</sup> 733.4654, found: 733.4658.

**FTIR** (neat): 2940, 2865, 1736, 1612, 1280, 1220, 1096, 1006 cm<sup>-1</sup>.

**Optical Rotation** [α]<sub>D</sub><sup>24</sup> = -17° (*c* = 0.21, CHCl<sub>3</sub>)



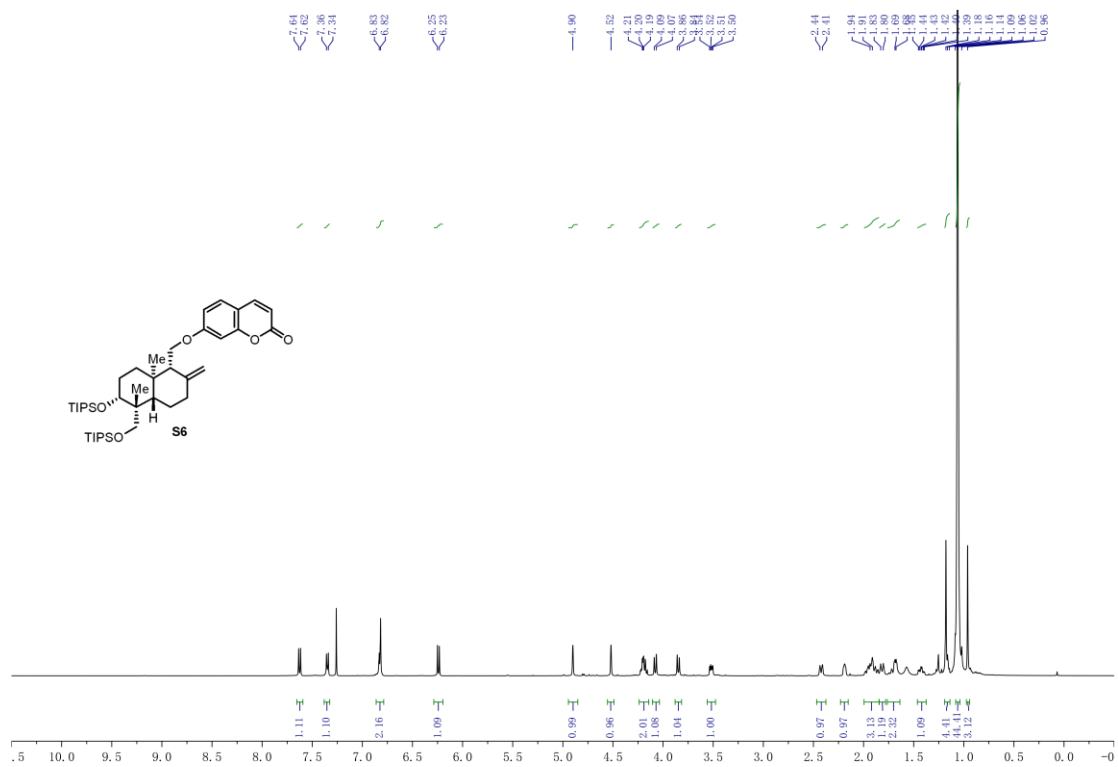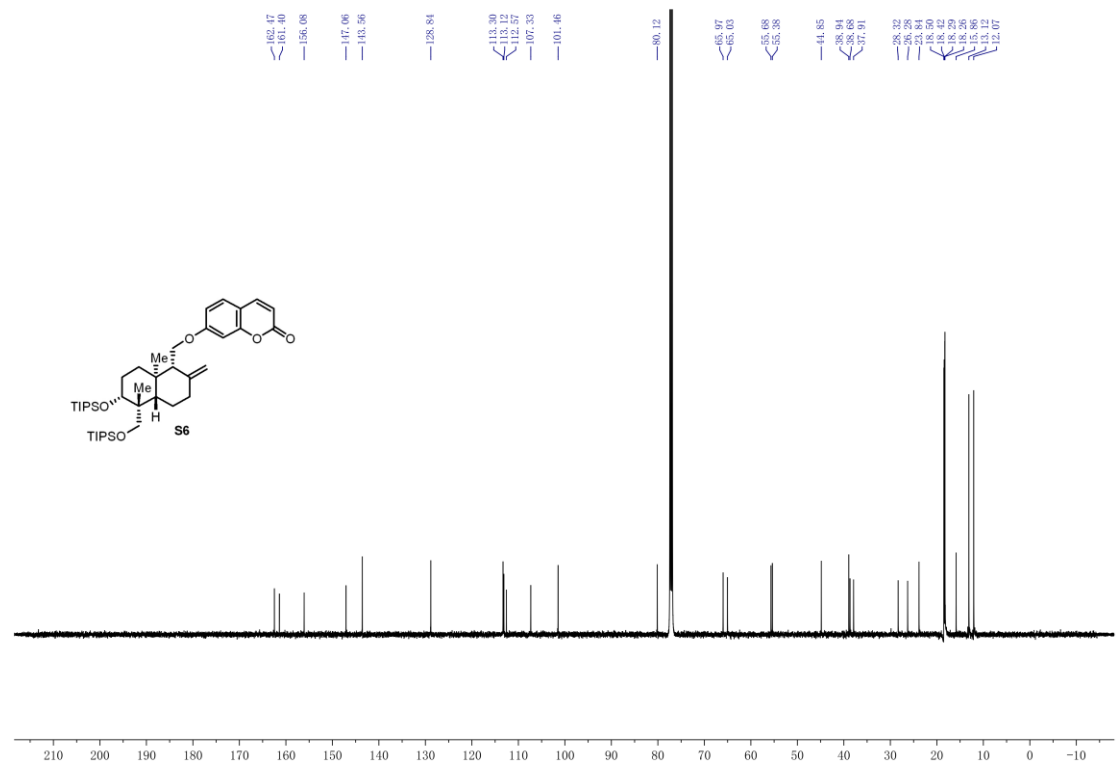

## 14-Hydroxy-colladonin

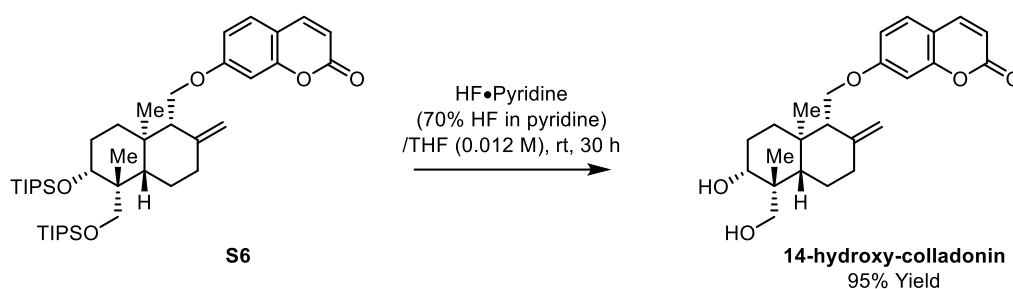

### Detailed Procedures

To a solution of **S6** (10.1 mg, 0.014 mmol, 100 mol%) in THF (0.5 mL) was added hydrogen fluoride•pyridine (70% HF in pyridine, 376  $\mu$ L) at 0 °C. The reaction mixture was allowed to warm to room temperature and was stirred for 30 hours. The reaction was diluted with ethyl acetate. NaHCO<sub>3</sub> (aq., sat., 5 mL) was added and the reaction mixture was transferred to a separatory funnel. The aqueous phase was extracted with ethyl acetate. The combined organic extracts were washed with brine, and dried (Na<sub>2</sub>SO<sub>4</sub>). The solvent was removed under reduced pressure and the residue was subjected to flash column chromatography on silica gel (PE/ ethyl acetate = 1/1 to 1/2). The title compound **14-hydroxycolladonin** was obtained as colorless plates (5.4 mg, 0.0136 mmol) in 95% yield.

**<sup>1</sup>H NMR** (500 MHz, CDCl<sub>3</sub>)  $\delta$  7.63 (d,  $J$  = 9.5 Hz, 1H), 7.35 (d,  $J$  = 9.2 Hz, 1H), 6.84 – 6.79 (m, 2H), 6.25 (d,  $J$  = 9.5 Hz, 1H), 4.91 (s, 1H), 4.54 (s, 1H), 4.24 – 4.13 (m, 3H), 3.53 (dd,  $J$  = 10.9, 4.5 Hz, 1H), 3.35 (d,  $J$  = 11.1 Hz, 1H), 2.46 (dd,  $J$  = 13.5, 3.2 Hz, 1H), 2.22 – 2.18 (m, 1H), 2.12 – 2.02 (m, 2H), 1.89 – 1.80 (m, 4H), 1.46 (td,  $J$  = 13.8, 5.4 Hz, 1H), 1.39 – 1.32 (m, 1H), 1.27 (s, 3H), 0.79 (s, 3H).

**<sup>13</sup>C NMR** (125 MHz, CDCl<sub>3</sub>)  $\delta$  162.2, 161.4, 156.1, 145.9, 143.5, 128.9, 113.2, 113.2, 112.7, 108.4, 101.5, 80.6, 65.8, 64.3, 55.3, 54.8, 43.2, 38.6, 37.7, 37.1, 28.3, 23.7, 22.9, 16.3.

**<sup>1</sup>H NMR** (400 MHz, CDCl<sub>3</sub>/DMSO-*d*<sub>6</sub> (v/v) = 10/1)  $\delta$  7.53 (d,  $J$  = 9.5 Hz, 1H), 7.25 (d,  $J$  = 8.5 Hz, 1H), 6.69 – 6.65 (m, 2H), 6.08 (d,  $J$  = 9.5 Hz, 1H), 4.75 (s, 1H), 4.39 (s, 1H), 4.09 – 3.92 (m, 3H), 3.21 (s, 3H), 3.15 (d,  $J$  = 10.8 Hz, 1H), 2.35 – 2.27 (m, 1H), 2.08 – 2.01 (m, 1H), 1.99 – 1.82 (m, 1H), 1.74 – 1.62 (m, 4H), 1.33 – 1.12 (m, 4H), 1.11 (s, 3H), 0.64 (s, 3H).

**<sup>13</sup>C NMR** (125 MHz, CDCl<sub>3</sub>/DMSO-*d*<sub>6</sub> (v/v) = 10/1)  $\delta$  161.8, 160.8, 155.4, 145.5, 143.2, 128.5, 112.5, 112.5, 112.1, 107.6, 101.0, 79.3, 65.3, 63.6, 54.7, 54.3, 42.3, 39.5, 37.2, 36.6, 27.6, 23.1, 22.7, 15.8.

**R<sub>f</sub>** 0.31 (hexanes/ethyl acetate = 1/2, UV/KMnO<sub>4</sub>)

**HRMS** (ESI) Calcd. for (M+Na)<sup>+</sup> 421.1985, found: 421.1992.

**FTIR** (neat): 3314, 2929, 2852, 1708, 1612, 1285, 1240, 1121, 1155, 1034, 825 cm<sup>-1</sup>.

**Optical Rotation**  $[\alpha]_D^{24} = -36.4^\circ$  ( $c = 0.11$ , CH<sub>2</sub>Cl<sub>2</sub>)

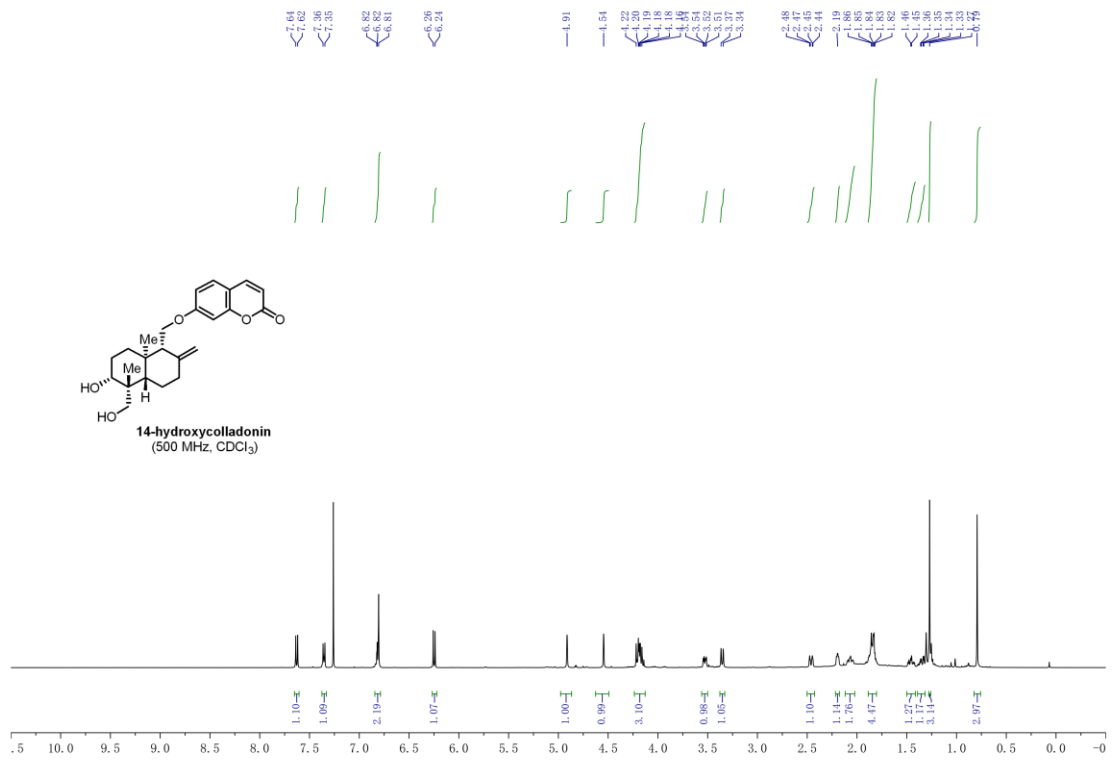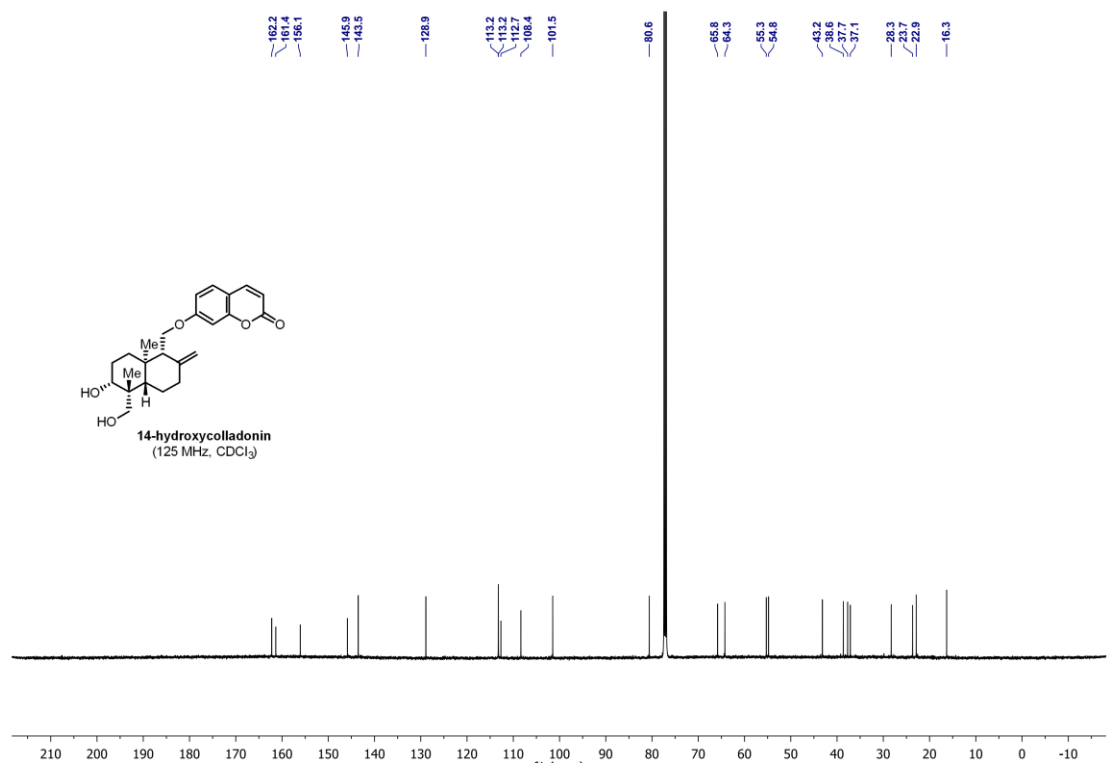

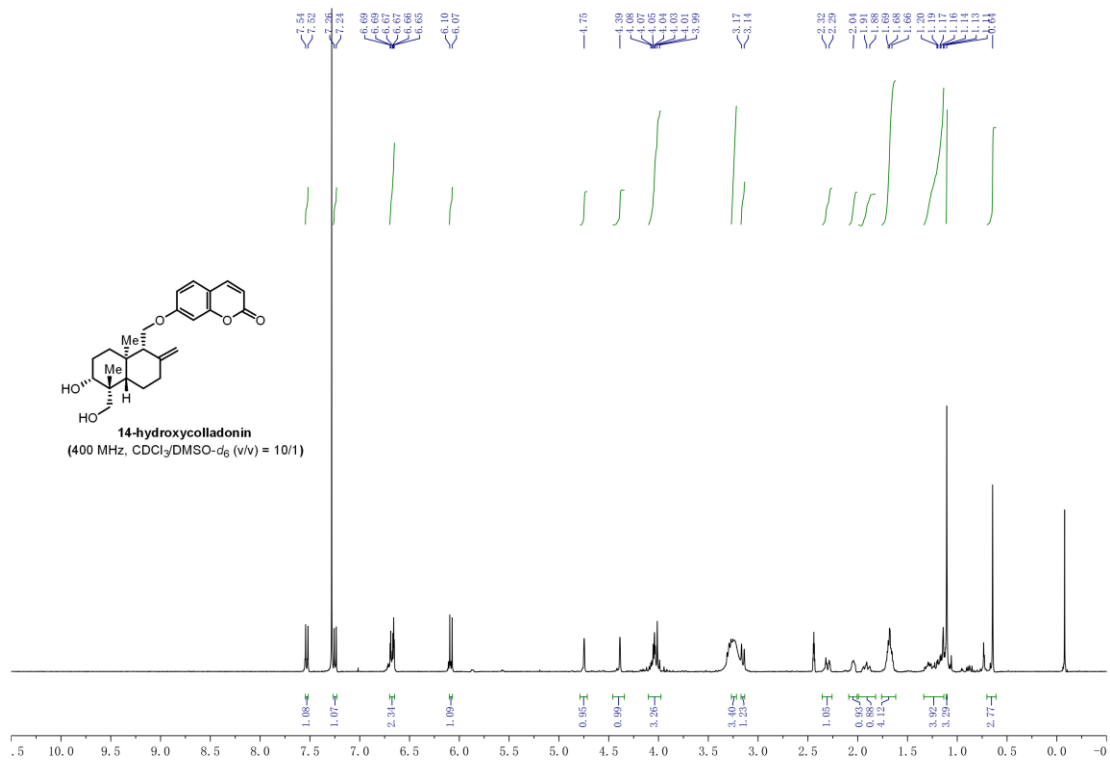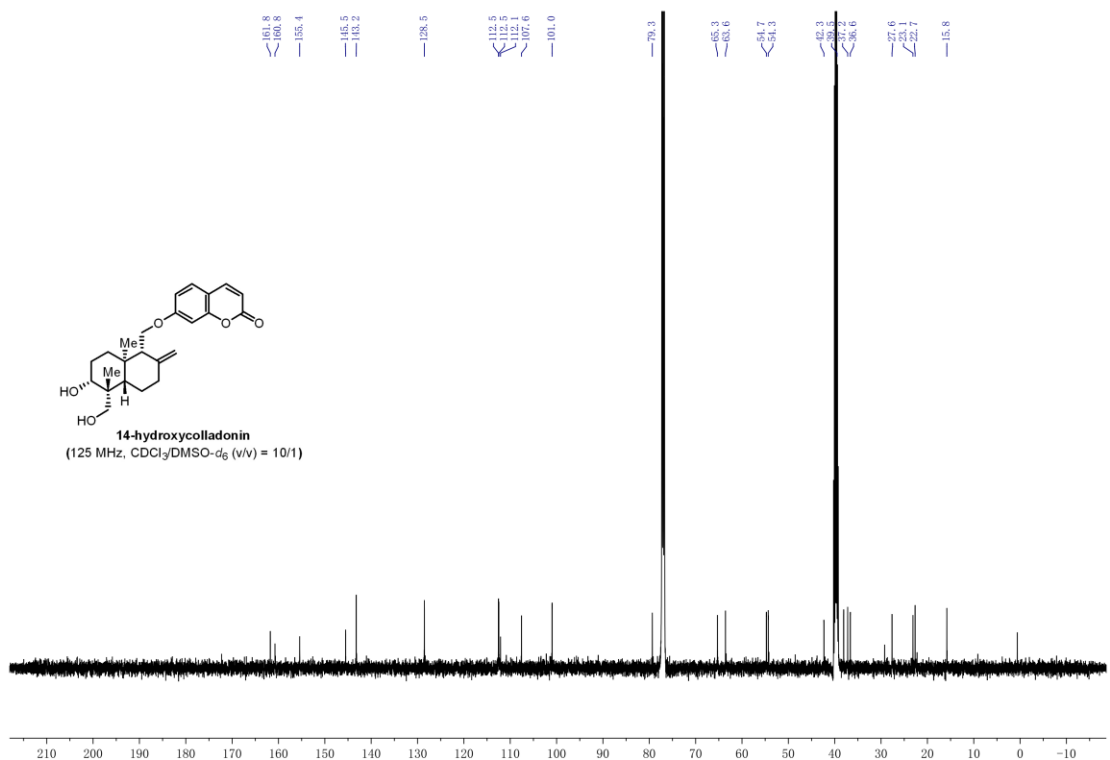

**Comparison of NMR Data between Natural and Synthetic Andrographolide and 14-Hydroxy-colladonin**

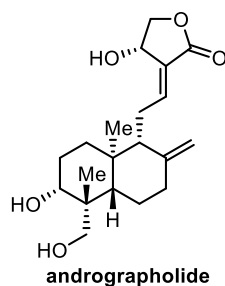

**Table S1.** <sup>1</sup>H NMR data of natural<sup>8</sup> and synthetic andrographolide

| Natural          |                                  | Synthetic (This Work) |                                  |
|------------------|----------------------------------|-----------------------|----------------------------------|
| $\delta_H$ (ppm) | multiplicity, J(Hz), integration | $\delta_H$ (ppm)      | multiplicity, J(Hz), integration |
| 6.75             | td, 6.0, 1.0, 1H                 | 6.75                  | td, 6.8, 1.5, 1H                 |
| 4.92             | d, 6.0, 1H                       | 4.91                  | d, 6.0, 1H                       |
| 4.79             | brs, 1H                          | 4.79                  | brs, 1H                          |
| 4.57             | brs, 1H                          | 4.57                  | brs, 1H                          |
| 4.37             | dd, 10.0, 6.0, 1H                | 4.37                  | dd, 10.2, 6.1, 1H                |
| 4.07             | dd, 10.0, 2.0, 1H                | 4.06                  | dd, 10.2, 2.0, 1H                |
| 4.02             | d, 11.0, 1H                      | 4.02                  | d, 11.0, 1H                      |
| 3.27             | d, 11.0, 1H                      | 3.27                  | d, 11.0, 1H                      |
| 3.23-3.17        | m, 1H                            | 3.32-3.19             | m, 1H                            |
| 2.58-2.43        | m, 2H                            | 2.58-2.43             | m, 2H                            |
| 2.33             | dt, 7.0, 2.0, 1H                 | 2.38-2.28             | m, 1H                            |
| 1.98-1.64        | m, 5H                            | 1.98-1.64             | m, 5H                            |
| 1.35-1.15        | m, 4H                            | 1.34-1.15             | m, 4H                            |
| 1.12             | s, 3H                            | 1.12                  | s, 3H                            |
| 0.65             | s, 3H                            | 0.66                  | s, 3H                            |

**Table S2.** <sup>13</sup>C NMR data of natural<sup>8</sup> and synthetic andrographolide

| <b>Natural</b>            | <b>Synthetic (This Work)</b> |
|---------------------------|------------------------------|
| $\delta_{\text{H}}$ (ppm) | $\delta_{\text{H}}$ (ppm)    |
| 172.7                     | 172.7                        |
| 149.5                     | 149.4                        |
| 148.8                     | 148.8                        |
| 129.7                     | 129.8                        |
| 109.2                     | 109.2                        |
| 80.9                      | 80.9                         |
| 76.2                      | 76.2                         |
| 66.6                      | 66.7                         |
| 65.0                      | 65.0                         |
| 57.4                      | 57.4                         |
| 56.3                      | 56.3                         |
| 43.7                      | 43.7                         |
| 40.0                      | 40.0                         |
| 39.0                      | 39.0                         |
| 38.1                      | 38.2                         |
| 29.0                      | 29.1                         |
| 25.7                      | 25.7                         |
| 25.2                      | 25.2                         |
| 23.4                      | 23.4                         |
| 15.5                      | 15.5                         |

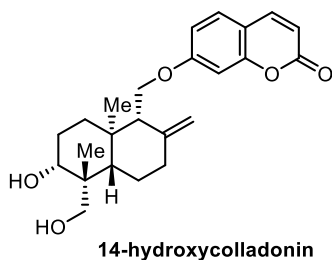

**Table S3.** <sup>1</sup>H NMR data of natural<sup>9</sup> and synthetic 14-hydroxy-colladonin

| <b>Natural<sup>1</sup></b><br>300 MHz<br>CDCl <sub>3</sub> /DMSO- <i>d</i> <sub>6</sub> (unknown) |                                             | <b>Synthetic (This Work)</b><br>400 MHz<br>CDCl <sub>3</sub> /DMSO- <i>d</i> <sub>6</sub> (v/v) = 10/1 |                                             |
|---------------------------------------------------------------------------------------------------|---------------------------------------------|--------------------------------------------------------------------------------------------------------|---------------------------------------------|
| $\delta_{\text{H}}$ (ppm)                                                                         | multiplicity,<br><i>J</i> (Hz), integration | $\delta_{\text{H}}$ (ppm)                                                                              | multiplicity,<br><i>J</i> (Hz), integration |
| 7.53                                                                                              | d, 9.4, 1H                                  | 7.53                                                                                                   | d, 9.5, 1H                                  |
| 7.24                                                                                              | d, 8.4, 1H                                  | 7.25                                                                                                   | d, 8.5, 1H                                  |
| 6.66                                                                                              | m, 2H                                       | 6.69-6.65                                                                                              | m, 2H                                       |
| 6.08                                                                                              | d, 9.4, 1H                                  | 6.08                                                                                                   | d, 9.5, 1H                                  |
| 4.75                                                                                              | s, 1H                                       | 4.75                                                                                                   | s, 1H                                       |
| 4.39                                                                                              | s, 1H                                       | 4.39                                                                                                   | s, 1H                                       |
| 4.04                                                                                              | m, 2H                                       | 4.09-3.92                                                                                              | m, 3H                                       |
| 3.84*                                                                                             | brs, 1H                                     |                                                                                                        |                                             |
| 3.19                                                                                              | brs, 1H                                     | 3.21                                                                                                   | brs, 3H                                     |
| 3.15                                                                                              | t, 9.6, 1H                                  | 3.15                                                                                                   | d, 10.8, 1H                                 |
| not shown <sup>#</sup>                                                                            |                                             | 2.35-2.27                                                                                              | m, 1H                                       |
| not shown <sup>#</sup>                                                                            |                                             | 2.08-2.01                                                                                              | m, 1H                                       |
| not shown <sup>#</sup>                                                                            |                                             | 1.99-1.82                                                                                              | m, 1H                                       |
| not shown <sup>#</sup>                                                                            |                                             | 1.74-1.62                                                                                              | m, 4H                                       |
| not shown <sup>#</sup>                                                                            |                                             | 1.33-1.12                                                                                              | m, 3H                                       |
| 1.11                                                                                              | s, 3H                                       | 1.11                                                                                                   | s, 3H                                       |
| 064                                                                                               | s, 3H                                       | 0.64                                                                                                   | s, 3H                                       |

\* Alcoholic proton

<sup>#</sup> The authors in ref. 1 did not give the chemical shifts of H1, H2, H6, H7 and H9.

**Table S4.**  $^{13}\text{C}$  NMR data of natural<sup>9</sup> and synthetic 14-hydroxy-colladonin

| <b>Natural</b><br>75 MHz<br>$\text{CDCl}_3/\text{DMSO}-d_6$ (unknown) | <b>Synthetic (This Work)</b><br>125 MHz<br>$\text{CDCl}_3/\text{DMSO}-d_6$ (v/v) = 10/1 | $\Delta\delta = \delta_N - \delta_S$<br>(ppm) |
|-----------------------------------------------------------------------|-----------------------------------------------------------------------------------------|-----------------------------------------------|
| $\delta_H$ (ppm)                                                      | $\delta_H$ (ppm)                                                                        | $\Delta\delta$ (ppm)                          |
| 161.8                                                                 | 161.8                                                                                   | 0                                             |
| 160.8                                                                 | 160.8                                                                                   | 0                                             |
| 155.4                                                                 | 155.4                                                                                   | 0                                             |
| 145.5                                                                 | 145.5                                                                                   | 0                                             |
| 143.2                                                                 | 143.2                                                                                   | 0                                             |
| 128.5                                                                 | 128.5                                                                                   | 0                                             |
| 112.5                                                                 | 112.5                                                                                   | 0                                             |
| 112.5                                                                 | 112.5                                                                                   | 0                                             |
| 112.1                                                                 | 112.1                                                                                   | 0                                             |
| 107.6                                                                 | 107.6                                                                                   | 0                                             |
| 101.0                                                                 | 101.0                                                                                   | 0                                             |
| 79.4                                                                  | 79.3                                                                                    | 0.1                                           |
| 65.3                                                                  | 65.3                                                                                    | 0                                             |
| 63.6                                                                  | 63.6                                                                                    | 0                                             |
| 54.8                                                                  | 54.7                                                                                    | 0.1                                           |
| 54.3                                                                  | 54.3                                                                                    | 0                                             |
| 42.3                                                                  | 42.3                                                                                    | 0                                             |
| 39.5                                                                  | 39.5                                                                                    | 0                                             |
| 37.2                                                                  | 37.2                                                                                    | 0                                             |
| 36.6                                                                  | 36.6                                                                                    | 0                                             |
| 27.6                                                                  | 27.6                                                                                    | 0                                             |
| 23.1                                                                  | 23.1                                                                                    | 0                                             |
| 22.7                                                                  | 22.7                                                                                    | 0                                             |
| 15.8                                                                  | 15.8                                                                                    | 0                                             |



## **Crystallographic Material for 9**

### **X-ray Experimental for C<sub>20</sub>H<sub>30</sub>O<sub>6</sub> (9)**

Crystals grew as clusters of colorless prisms by slow evaporation from dichloromethane. The data crystal was cut from a larger crystal and had approximate dimensions; 0.40 x 0.20 x 0.15 mm. The data were collected on a Rigaku AFC12 diffractometer with a Saturn 724+CCD using a graphite monochromator with MoK $\alpha$  radiation ( $= 0.71073\text{\AA}$ ). A total of 1293 frames of data were collected using  $\omega$ -scans with a scan range of  $0.5^\circ$  and a counting time of 25 seconds per frame. The data were collected at 100 K using a Rigaku XStream Cryostream low temperature device. Details of crystal data, data collection and structure refinement are listed in Table 5. Data reduction were performed using the Rigaku Americas Corporation's Crystal Clear version 1.40.<sup>10</sup> The structure was solved by direct methods using SUPERFLIP<sup>11</sup> and refined by full-matrix least-squares on  $F^2$  with anisotropic displacement parameters for the non-H atoms using SHELXL-2016/6.<sup>12</sup> Structure analysis was aided by use of the programs PLATON98<sup>13</sup> and WinGX.<sup>14</sup> The hydrogen atoms on carbon were calculated in ideal positions with isotropic displacement parameters set to 1.2xUeq of the attached atom (1.5xUeq for methyl hydrogen atoms).

There are three crystallographically unique molecules in the asymmetric unit. The molecules all have the same configuration and differ only slightly in their conformation. The absolute structure was assigned on the basis of the known configuration of the starting material.

The function,  $\sum w(|F_o|^2 - |F_c|^2)^2$ , was minimized, where  $w = 1/[(\sigma(F_o))^2 + (0.0352*P)^2]$  and  $P = (|F_o|^2 + 2|F_c|^2)/3$ .  $R_w(F^2)$  refined to 0.0958, with  $R(F)$  equal to 0.0339 and a goodness of fit,  $S$ , = 1.07. Definitions used for calculating  $R(F)$ ,  $R_w(F^2)$  and the goodness of fit,  $S$ , are given below.<sup>15</sup> The data were checked for secondary extinction effects but no correction was necessary. Neutral atom scattering factors and values used to calculate the linear absorption coefficient are from the International Tables for X-ray Crystallography (1992).<sup>16</sup> All figures were generated using SHELXTL/PC.<sup>17</sup> Tables of positional and thermal parameters, bond lengths and angles, torsion angles and figures are found elsewhere.

**Table S5.** Crystal data and structure refinement for **9**.

|                                   |                                                |                 |
|-----------------------------------|------------------------------------------------|-----------------|
| Empirical formula                 | C <sub>20</sub> H <sub>30</sub> O <sub>6</sub> |                 |
| Formula weight                    | 366.44                                         |                 |
| Temperature                       | 100(2) K                                       |                 |
| Wavelength                        | 0.71073 Å                                      |                 |
| Crystal system                    | monoclinic                                     |                 |
| Space group                       | P 21                                           |                 |
| Unit cell dimensions              | a = 12.3296(18) Å                              | ∠ = 90°.        |
|                                   | b = 10.4946(16) Å                              | ∠ = 90.083(4)°. |
|                                   | c = 22.352(3) Å                                | ∠ = 90°.        |
| Volume                            | 2892.2(8) Å <sup>3</sup>                       |                 |
| Z                                 | 6                                              |                 |
| Density (calculated)              | 1.262 Mg/m <sup>3</sup>                        |                 |
| Absorption coefficient            | 0.092 mm <sup>-1</sup>                         |                 |
| F(000)                            | 1188                                           |                 |
| Crystal size                      | 0.400 x 0.200 x 0.150 mm <sup>3</sup>          |                 |
| Theta range for data collection   | 3.132 to 27.483°.                              |                 |
| Index ranges                      | -15 ≤ h ≤ 16, -13 ≤ k ≤ 12, -29 ≤ l ≤ 29       |                 |
| Reflections collected             | 41107                                          |                 |
| Independent reflections           | 12456 [R(int) = 0.0428]                        |                 |
| Completeness to theta = 25.242°   | 99.7 %                                         |                 |
| Absorption correction             | Semi-empirical from equivalents                |                 |
| Max. and min. transmission        | 1.00 and 0.837                                 |                 |
| Refinement method                 | Full-matrix least-squares on F <sup>2</sup>    |                 |
| Data / restraints / parameters    | 12456 / 1 / 722                                |                 |
| Goodness-of-fit on F <sup>2</sup> | 1.072                                          |                 |
| Final R indices [I > 2σ(I)]       | R1 = 0.0339, wR2 = 0.0835                      |                 |
| R indices (all data)              | R1 = 0.0738, wR2 = 0.0958                      |                 |
| Absolute structure parameter      | 0.5(2)                                         |                 |
| Extinction coefficient            | n/a                                            |                 |
| Largest diff. peak and hole       | 0.268 and -0.158 e.Å <sup>-3</sup>             |                 |

**Table S6.** Atomic coordinates ( $\times 10^4$ ) and equivalent isotropic displacement parameters ( $\text{\AA}^2 \times 10^3$ ) for **9**. U(eq) is defined as one third of the trace of the orthogonalized  $U_{ij}$  tensor.

|     | x        | y        | z       | U(eq) |
|-----|----------|----------|---------|-------|
| O1  | 3716(4)  | -138(4)  | 1473(2) | 26(1) |
| O2  | 4257(4)  | 798(5)   | 574(2)  | 26(1) |
| O3  | 9069(4)  | -36(4)   | -14(2)  | 24(1) |
| O4  | 8804(4)  | 1791(4)  | 489(2)  | 23(1) |
| O5  | 10236(4) | 304(5)   | 1223(2) | 28(1) |
| O6  | 9741(4)  | -23(5)   | 2171(2) | 27(1) |
| C1  | 3360(6)  | 525(7)   | 958(3)  | 25(2) |
| C2  | 5132(5)  | 1474(7)  | 857(3)  | 22(2) |
| C3  | 5993(6)  | 1634(7)  | 373(3)  | 29(2) |
| C4  | 6426(6)  | 337(8)   | 176(3)  | 30(2) |
| C5  | 6886(5)  | -482(6)  | 685(3)  | 21(2) |
| C6  | 8011(6)  | -38(6)   | 885(3)  | 18(1) |
| C7  | 8387(5)  | -270(6)  | 1438(3) | 18(2) |
| C8  | 7732(6)  | -835(7)  | 1933(3) | 23(2) |
| C9  | 6590(6)  | -1269(6) | 1748(3) | 25(2) |
| C10 | 6075(5)  | -539(6)  | 1218(3) | 21(2) |
| C11 | 5543(6)  | 763(6)   | 1402(3) | 19(2) |
| C12 | 4542(6)  | 507(7)   | 1793(3) | 24(2) |
| C13 | 2736(5)  | 1736(7)  | 1115(3) | 29(2) |
| C14 | 2659(6)  | -386(8)  | 614(4)  | 39(2) |
| C15 | 7060(6)  | -1829(7) | 434(4)  | 39(2) |
| C16 | 8711(5)  | 533(6)   | 409(3)  | 17(1) |
| C17 | 9507(6)  | 2448(7)  | 65(4)   | 33(2) |
| C18 | 9551(6)  | 45(6)    | 1585(3) | 20(2) |
| C19 | 10847(6) | 218(7)   | 2360(3) | 29(2) |
| C20 | 6302(6)  | 1657(7)  | 1763(3) | 26(2) |
| O7  | 10928(4) | 795(5)   | 3907(2) | 26(1) |
| O8  | 10375(4) | -131(5)  | 4808(2) | 26(1) |
| O9  | 15737(4) | -36(5)   | 3318(2) | 26(1) |
| O10 | 15473(4) | 1793(4)  | 3825(2) | 21(1) |
| O11 | 16907(4) | 291(5)   | 4559(2) | 28(1) |

|     |          |          |         |       |
|-----|----------|----------|---------|-------|
| O12 | 16405(4) | -31(5)   | 5508(2) | 26(1) |
| C21 | 10014(6) | 528(8)   | 4285(3) | 26(2) |
| C22 | 11800(5) | 1466(7)  | 4193(3) | 23(2) |
| C23 | 12665(6) | 1624(7)  | 3704(3) | 30(2) |
| C24 | 13081(6) | 344(8)   | 3510(3) | 34(2) |
| C25 | 13551(6) | -466(6)  | 4025(3) | 24(2) |
| C26 | 14684(5) | -39(6)   | 4222(3) | 17(1) |
| C27 | 15065(5) | -262(6)  | 4773(3) | 18(2) |
| C28 | 14395(6) | -843(7)  | 5267(3) | 23(2) |
| C29 | 13251(6) | -1265(6) | 5075(3) | 26(2) |
| C30 | 12747(5) | -543(6)  | 4561(3) | 20(2) |
| C31 | 12225(5) | 771(6)   | 4734(3) | 19(2) |
| C32 | 11220(6) | 513(7)   | 5125(3) | 24(2) |
| C33 | 9396(6)  | 1737(7)  | 4449(3) | 31(2) |
| C34 | 9320(6)  | -401(8)  | 3945(4) | 39(2) |
| C35 | 13739(6) | -1831(7) | 3765(4) | 39(2) |
| C36 | 15379(5) | 540(6)   | 3742(3) | 18(2) |
| C37 | 16177(6) | 2431(6)  | 3406(3) | 30(2) |
| C38 | 16206(6) | 44(6)    | 4916(3) | 20(2) |
| C39 | 17507(6) | 219(7)   | 5689(3) | 27(2) |
| C40 | 12972(6) | 1640(6)  | 5090(3) | 27(2) |
| O13 | 12407(4) | 5792(5)  | 2760(2) | 25(1) |
| O14 | 12953(4) | 4864(5)  | 1859(2) | 27(1) |
| O15 | 7599(4)  | 4970(5)  | 3347(2) | 25(1) |
| O16 | 7855(4)  | 6796(4)  | 2844(2) | 22(1) |
| O17 | 6430(4)  | 5304(5)  | 2109(2) | 28(1) |
| O18 | 6925(4)  | 4974(5)  | 1160(2) | 26(1) |
| C41 | 13316(6) | 5542(7)  | 2381(3) | 27(2) |
| C42 | 12115(5) | 5511(7)  | 1535(3) | 24(2) |
| C43 | 11099(6) | 5753(6)  | 1927(3) | 19(2) |
| C44 | 10587(6) | 4469(6)  | 2119(3) | 20(2) |
| C45 | 10079(6) | 3725(6)  | 1591(3) | 25(2) |
| C46 | 8946(6)  | 4167(7)  | 1397(3) | 24(2) |
| C47 | 8269(5)  | 4734(6)  | 1889(3) | 18(2) |
| C48 | 8665(5)  | 4963(6)  | 2438(3) | 18(1) |
| C49 | 9779(6)  | 4524(6)  | 2651(3) | 22(2) |

|     |          |         |         |       |
|-----|----------|---------|---------|-------|
| C50 | 10253(6) | 5341(8) | 3158(3) | 31(2) |
| C51 | 10671(6) | 6637(8) | 2962(3) | 32(2) |
| C52 | 11530(5) | 6481(7) | 2492(3) | 22(2) |
| C53 | 13943(6) | 6743(7) | 2216(3) | 30(2) |
| C54 | 14009(6) | 4600(8) | 2732(4) | 39(2) |
| C55 | 10371(6) | 6650(6) | 1570(3) | 26(2) |
| C56 | 7115(5)  | 5041(6) | 1751(3) | 19(2) |
| C57 | 5822(5)  | 5213(7) | 978(3)  | 28(2) |
| C58 | 7960(5)  | 5527(7) | 2921(3) | 19(2) |
| C59 | 7162(6)  | 7441(7) | 3266(3) | 31(2) |
| C60 | 9601(7)  | 3180(7) | 2903(4) | 41(2) |

---

**Table S7.** Bond lengths [Å] and angles [°] for **9**.

|        |           |          |          |
|--------|-----------|----------|----------|
| O1-C1  | 1.413(8)  | C10-C11  | 1.571(9) |
| O1-C12 | 1.417(8)  | C10-H10  | 1.00     |
| O2-C1  | 1.430(8)  | C11-C12  | 1.537(8) |
| O2-C2  | 1.437(8)  | C11-C20  | 1.550(8) |
| O3-C16 | 1.203(7)  | C12-H12A | 0.99     |
| O4-C16 | 1.337(7)  | C12-H12B | 0.99     |
| O4-C17 | 1.458(7)  | C13-H13A | 0.98     |
| O5-C18 | 1.202(7)  | C13-H13B | 0.98     |
| O6-C18 | 1.333(7)  | C13-H13C | 0.98     |
| O6-C19 | 1.448(8)  | C14-H14A | 0.98     |
| C1-C14 | 1.500(10) | C14-H14B | 0.98     |
| C1-C13 | 1.526(9)  | C14-H14C | 0.98     |
| C2-C11 | 1.516(9)  | C15-H15A | 0.98     |
| C2-C3  | 1.526(9)  | C15-H15B | 0.98     |
| C2-H2  | 1.00      | C15-H15C | 0.98     |
| C3-C4  | 1.528(10) | C17-H17A | 0.98     |
| C3-H3A | 0.99      | C17-H17B | 0.98     |
| C3-H3B | 0.99      | C17-H17C | 0.98     |
| C4-C5  | 1.534(9)  | C19-H19A | 0.98     |
| C4-H4A | 0.99      | C19-H19B | 0.98     |
| C4-H4B | 0.99      | C19-H19C | 0.98     |
| C5-C6  | 1.530(9)  | C20-H20A | 0.98     |
| C5-C15 | 1.536(9)  | C20-H20B | 0.98     |
| C5-C10 | 1.557(9)  | C20-H20C | 0.98     |
| C6-C7  | 1.340(9)  | O7-C22   | 1.436(8) |
| C6-C16 | 1.497(9)  | O7-C21   | 1.438(7) |
| C7-C8  | 1.494(9)  | O8-C32   | 1.428(8) |
| C7-C18 | 1.509(9)  | O8-C21   | 1.429(8) |
| C8-C9  | 1.536(9)  | O9-C36   | 1.209(7) |
| C8-H8A | 0.99      | O10-C36  | 1.333(7) |
| C8-H8B | 0.99      | O10-C37  | 1.442(7) |
| C9-C10 | 1.546(9)  | O11-C38  | 1.206(8) |
| C9-H9A | 0.99      | O12-C38  | 1.348(7) |
| C9-H9B | 0.99      | O12-C39  | 1.441(8) |

|          |           |          |           |
|----------|-----------|----------|-----------|
| C21-C34  | 1.502(10) | C35-H35A | 0.98      |
| C21-C33  | 1.525(9)  | C35-H35B | 0.98      |
| C22-C31  | 1.506(9)  | C35-H35C | 0.98      |
| C22-C23  | 1.537(9)  | C37-H37A | 0.98      |
| C22-H22  | 1.00      | C37-H37B | 0.98      |
| C23-C24  | 1.502(10) | C37-H37C | 0.98      |
| C23-H23A | 0.99      | C39-H39A | 0.98      |
| C23-H23B | 0.99      | C39-H39B | 0.98      |
| C24-C25  | 1.543(10) | C39-H39C | 0.98      |
| C24-H24A | 0.99      | C40-H40A | 0.98      |
| C24-H24B | 0.99      | C40-H40B | 0.98      |
| C25-C26  | 1.531(10) | C40-H40C | 0.98      |
| C25-C30  | 1.558(9)  | O13-C41  | 1.430(8)  |
| C25-C35  | 1.563(9)  | O13-C52  | 1.433(7)  |
| C26-C27  | 1.339(9)  | O14-C42  | 1.433(8)  |
| C26-C36  | 1.501(9)  | O14-C41  | 1.437(8)  |
| C27-C38  | 1.478(9)  | O15-C58  | 1.205(7)  |
| C27-C28  | 1.508(9)  | O16-C58  | 1.348(8)  |
| C28-C29  | 1.538(10) | O16-C59  | 1.443(7)  |
| C28-H28A | 0.99      | O17-C56  | 1.197(8)  |
| C28-H28B | 0.99      | O18-C56  | 1.343(7)  |
| C29-C30  | 1.511(9)  | O18-C57  | 1.440(8)  |
| C29-H29A | 0.99      | C41-C54  | 1.524(10) |
| C29-H29B | 0.99      | C41-C53  | 1.524(10) |
| C30-C31  | 1.570(8)  | C42-C43  | 1.551(9)  |
| C30-H30  | 1.00      | C42-H42A | 0.99      |
| C31-C40  | 1.520(9)  | C42-H42B | 0.99      |
| C31-C32  | 1.541(9)  | C43-C55  | 1.526(9)  |
| C32-H32A | 0.99      | C43-C44  | 1.548(9)  |
| C32-H32B | 0.99      | C43-C52  | 1.567(8)  |
| C33-H33A | 0.98      | C44-C45  | 1.547(9)  |
| C33-H33B | 0.98      | C44-C49  | 1.554(9)  |
| C33-H33C | 0.98      | C44-H44  | 1.00      |
| C34-H34A | 0.98      | C45-C46  | 1.534(10) |
| C34-H34B | 0.98      | C45-H45A | 0.99      |
| C34-H34C | 0.98      | C45-H45B | 0.99      |

|          |           |          |      |
|----------|-----------|----------|------|
| C46-C47  | 1.504(9)  | C53-H53B | 0.98 |
| C46-H46A | 0.99      | C53-H53C | 0.98 |
| C46-H46B | 0.99      | C54-H54A | 0.98 |
| C47-C48  | 1.340(8)  | C54-H54B | 0.98 |
| C47-C56  | 1.491(9)  | C54-H54C | 0.98 |
| C48-C58  | 1.507(9)  | C55-H55A | 0.98 |
| C48-C49  | 1.525(9)  | C55-H55B | 0.98 |
| C49-C60  | 1.534(9)  | C55-H55C | 0.98 |
| C49-C50  | 1.535(10) | C57-H57A | 0.98 |
| C50-C51  | 1.519(10) | C57-H57B | 0.98 |
| C50-H50A | 0.99      | C57-H57C | 0.98 |
| C50-H50B | 0.99      | C59-H59A | 0.98 |
| C51-C52  | 1.502(9)  | C59-H59B | 0.98 |
| C51-H51A | 0.99      | C59-H59C | 0.98 |
| C51-H51B | 0.99      | C60-H60A | 0.98 |
| C52-H52  | 1.00      | C60-H60B | 0.98 |
| C53-H53A | 0.98      | C60-H60C | 0.98 |

|            |          |            |          |
|------------|----------|------------|----------|
| C1-O1-C12  | 113.4(5) | C4-C3-H3A  | 109.5    |
| C1-O2-C2   | 114.5(5) | C2-C3-H3B  | 109.5    |
| C16-O4-C17 | 115.5(5) | C4-C3-H3B  | 109.5    |
| C18-O6-C19 | 116.1(5) | H3A-C3-H3B | 108.1    |
| O1-C1-O2   | 110.4(5) | C3-C4-C5   | 114.5(5) |
| O1-C1-C14  | 106.3(6) | C3-C4-H4A  | 108.6    |
| O2-C1-C14  | 105.4(6) | C5-C4-H4A  | 108.6    |
| O1-C1-C13  | 112.3(6) | C3-C4-H4B  | 108.7    |
| O2-C1-C13  | 111.2(5) | C5-C4-H4B  | 108.6    |
| C14-C1-C13 | 111.0(6) | H4A-C4-H4B | 107.6    |
| O2-C2-C11  | 111.2(6) | C6-C5-C4   | 112.3(6) |
| O2-C2-C3   | 105.4(6) | C6-C5-C15  | 105.1(6) |
| C11-C2-C3  | 113.0(6) | C4-C5-C15  | 107.3(6) |
| O2-C2-H2   | 109.1    | C6-C5-C10  | 111.7(5) |
| C11-C2-H2  | 109.1    | C4-C5-C10  | 110.6(5) |
| C3-C2-H2   | 109.1    | C15-C5-C10 | 109.5(5) |
| C2-C3-C4   | 110.5(6) | C7-C6-C16  | 122.0(6) |
| C2-C3-H3A  | 109.5    | C7-C6-C5   | 121.8(6) |



|               |          |               |          |
|---------------|----------|---------------|----------|
| C16-C6-C5     | 115.9(6) | H13A-C13-H13B | 109.5    |
| C6-C7-C8      | 124.6(6) | C1-C13-H13C   | 109.5    |
| C6-C7-C18     | 119.2(6) | H13A-C13-H13C | 109.5    |
| C8-C7-C18     | 116.1(6) | H13B-C13-H13C | 109.5    |
| C7-C8-C9      | 114.4(6) | C1-C14-H14A   | 109.5    |
| C7-C8-H8A     | 108.6    | C1-C14-H14B   | 109.5    |
| C9-C8-H8A     | 108.7    | H14A-C14-H14B | 109.5    |
| C7-C8-H8B     | 108.6    | C1-C14-H14C   | 109.5    |
| C9-C8-H8B     | 108.7    | H14A-C14-H14C | 109.5    |
| H8A-C8-H8B    | 107.6    | H14B-C14-H14C | 109.5    |
| C8-C9-C10     | 115.8(5) | C5-C15-H15A   | 109.5    |
| C8-C9-H9A     | 108.3    | C5-C15-H15B   | 109.5    |
| C10-C9-H9A    | 108.3    | H15A-C15-H15B | 109.5    |
| C8-C9-H9B     | 108.3    | C5-C15-H15C   | 109.5    |
| C10-C9-H9B    | 108.3    | H15A-C15-H15C | 109.5    |
| H9A-C9-H9B    | 107.4    | H15B-C15-H15C | 109.5    |
| C9-C10-C5     | 110.0(5) | O3-C16-O4     | 124.3(6) |
| C9-C10-C11    | 113.6(6) | O3-C16-C6     | 125.0(6) |
| C5-C10-C11    | 115.9(5) | O4-C16-C6     | 110.5(6) |
| C9-C10-H10    | 105.5    | O4-C17-H17A   | 109.5    |
| C5-C10-H10    | 105.5    | O4-C17-H17B   | 109.5    |
| C11-C10-H10   | 105.5    | H17A-C17-H17B | 109.5    |
| C2-C11-C12    | 106.0(6) | O4-C17-H17C   | 109.5    |
| C2-C11-C20    | 108.7(6) | H17A-C17-H17C | 109.5    |
| C12-C11-C20   | 107.2(5) | H17B-C17-H17C | 109.5    |
| C2-C11-C10    | 110.9(5) | O5-C18-O6     | 123.5(6) |
| C12-C11-C10   | 109.4(5) | O5-C18-C7     | 124.9(6) |
| C20-C11-C10   | 114.3(6) | O6-C18-C7     | 111.6(6) |
| O1-C12-C11    | 112.0(5) | O6-C19-H19A   | 109.5    |
| O1-C12-H12A   | 109.2    | O6-C19-H19B   | 109.5    |
| C11-C12-H12A  | 109.2    | H19A-C19-H19B | 109.5    |
| O1-C12-H12B   | 109.2    | O6-C19-H19C   | 109.5    |
| C11-C12-H12B  | 109.2    | H19A-C19-H19C | 109.5    |
| H12A-C12-H12B | 107.9    | H19B-C19-H19C | 109.5    |
| C1-C13-H13A   | 109.5    | C11-C20-H20A  | 109.5    |
| C1-C13-H13B   | 109.5    | C11-C20-H20B  | 109.5    |

|               |          |               |          |
|---------------|----------|---------------|----------|
| H20A-C20-H20B | 109.5    | C24-C25-C35   | 106.5(6) |
| C11-C20-H20C  | 109.5    | C30-C25-C35   | 109.4(6) |
| H20A-C20-H20C | 109.5    | C27-C26-C36   | 121.9(6) |
| H20B-C20-H20C | 109.5    | C27-C26-C25   | 122.1(6) |
| C22-O7-C21    | 114.9(5) | C36-C26-C25   | 115.8(6) |
| C32-O8-C21    | 113.8(5) | C26-C27-C38   | 119.6(6) |
| C36-O10-C37   | 114.8(5) | C26-C27-C28   | 123.5(7) |
| C38-O12-C39   | 115.8(5) | C38-C27-C28   | 116.9(6) |
| O8-C21-O7     | 109.3(6) | C27-C28-C29   | 114.6(6) |
| O8-C21-C34    | 106.1(6) | C27-C28-H28A  | 108.6    |
| O7-C21-C34    | 105.9(6) | C29-C28-H28A  | 108.6    |
| O8-C21-C33    | 111.2(6) | C27-C28-H28B  | 108.6    |
| O7-C21-C33    | 111.8(6) | C29-C28-H28B  | 108.6    |
| C34-C21-C33   | 112.2(6) | H28A-C28-H28B | 107.6    |
| O7-C22-C31    | 112.3(6) | C30-C29-C28   | 116.3(6) |
| O7-C22-C23    | 104.8(5) | C30-C29-H29A  | 108.2    |
| C31-C22-C23   | 112.5(6) | C28-C29-H29A  | 108.2    |
| O7-C22-H22    | 109.0    | C30-C29-H29B  | 108.2    |
| C31-C22-H22   | 109.0    | C28-C29-H29B  | 108.2    |
| C23-C22-H22   | 109.0    | H29A-C29-H29B | 107.4    |
| C24-C23-C22   | 110.3(6) | C29-C30-C25   | 110.5(6) |
| C24-C23-H23A  | 109.6    | C29-C30-C31   | 114.9(5) |
| C22-C23-H23A  | 109.6    | C25-C30-C31   | 113.9(5) |
| C24-C23-H23B  | 109.6    | C29-C30-H30   | 105.5    |
| C22-C23-H23B  | 109.6    | C25-C30-H30   | 105.5    |
| H23A-C23-H23B | 108.1    | C31-C30-H30   | 105.5    |
| C23-C24-C25   | 113.9(6) | C22-C31-C40   | 109.8(5) |
| C23-C24-H24A  | 108.8    | C22-C31-C32   | 105.1(5) |
| C25-C24-H24A  | 108.8    | C40-C31-C32   | 107.2(5) |
| C23-C24-H24B  | 108.8    | C22-C31-C30   | 111.7(5) |
| C25-C24-H24B  | 108.8    | C40-C31-C30   | 114.1(5) |
| H24A-C24-H24B | 107.7    | C32-C31-C30   | 108.4(5) |
| C26-C25-C24   | 113.2(6) | O8-C32-C31    | 112.8(5) |
| C26-C25-C30   | 112.1(6) | O8-C32-H32A   | 109.0    |
| C24-C25-C30   | 111.3(6) | C31-C32-H32A  | 109.0    |
| C26-C25-C35   | 103.8(6) | O8-C32-H32B   | 109.0    |

|               |          |               |          |
|---------------|----------|---------------|----------|
| C31-C32-H32B  | 109.0    | H39A-C39-H39C | 109.5    |
| H32A-C32-H32B | 107.8    | H39B-C39-H39C | 109.5    |
| C21-C33-H33A  | 109.5    | C31-C40-H40A  | 109.5    |
| C21-C33-H33B  | 109.5    | C31-C40-H40B  | 109.5    |
| H33A-C33-H33B | 109.5    | H40A-C40-H40B | 109.5    |
| C21-C33-H33C  | 109.5    | C31-C40-H40C  | 109.5    |
| H33A-C33-H33C | 109.5    | H40A-C40-H40C | 109.5    |
| H33B-C33-H33C | 109.5    | H40B-C40-H40C | 109.5    |
| C21-C34-H34A  | 109.5    | C41-O13-C52   | 115.8(5) |
| C21-C34-H34B  | 109.5    | C42-O14-C41   | 113.6(5) |
| H34A-C34-H34B | 109.5    | C58-O16-C59   | 115.9(5) |
| C21-C34-H34C  | 109.5    | C56-O18-C57   | 115.6(5) |
| H34A-C34-H34C | 109.5    | O13-C41-O14   | 109.2(6) |
| H34B-C34-H34C | 109.5    | O13-C41-C54   | 104.6(6) |
| C25-C35-H35A  | 109.5    | O14-C41-C54   | 105.7(6) |
| C25-C35-H35B  | 109.5    | O13-C41-C53   | 113.0(6) |
| H35A-C35-H35B | 109.5    | O14-C41-C53   | 111.7(6) |
| C25-C35-H35C  | 109.5    | C54-C41-C53   | 112.2(6) |
| H35A-C35-H35C | 109.5    | O14-C42-C43   | 111.9(5) |
| H35B-C35-H35C | 109.5    | O14-C42-H42A  | 109.2    |
| O9-C36-O10    | 124.8(7) | C43-C42-H42A  | 109.2    |
| O9-C36-C26    | 124.6(6) | O14-C42-H42B  | 109.2    |
| O10-C36-C26   | 110.5(6) | C43-C42-H42B  | 109.2    |
| O10-C37-H37A  | 109.5    | H42A-C42-H42B | 107.9    |
| O10-C37-H37B  | 109.5    | C55-C43-C44   | 116.2(6) |
| H37A-C37-H37B | 109.5    | C55-C43-C42   | 106.2(5) |
| O10-C37-H37C  | 109.5    | C44-C43-C42   | 110.1(5) |
| H37A-C37-H37C | 109.5    | C55-C43-C52   | 108.6(5) |
| H37B-C37-H37C | 109.5    | C44-C43-C52   | 109.9(5) |
| O11-C38-O12   | 122.2(7) | C42-C43-C52   | 105.2(5) |
| O11-C38-C27   | 125.9(6) | C45-C44-C43   | 113.2(5) |
| O12-C38-C27   | 111.9(6) | C45-C44-C49   | 110.1(6) |
| O12-C39-H39A  | 109.5    | C43-C44-C49   | 116.2(5) |
| O12-C39-H39B  | 109.5    | C45-C44-H44   | 105.4    |
| H39A-C39-H39B | 109.5    | C43-C44-H44   | 105.4    |
| O12-C39-H39C  | 109.5    | C49-C44-H44   | 105.4    |

|               |          |               |          |
|---------------|----------|---------------|----------|
| C46-C45-C44   | 115.4(6) | O13-C52-C51   | 107.1(5) |
| C46-C45-H45A  | 108.4    | O13-C52-C43   | 110.2(5) |
| C44-C45-H45A  | 108.4    | C51-C52-C43   | 112.2(6) |
| C46-C45-H45B  | 108.4    | O13-C52-H52   | 109.1    |
| C44-C45-H45B  | 108.4    | C51-C52-H52   | 109.1    |
| H45A-C45-H45B | 107.5    | C43-C52-H52   | 109.1    |
| C47-C46-C45   | 114.8(6) | C41-C53-H53A  | 109.5    |
| C47-C46-H46A  | 108.6    | C41-C53-H53B  | 109.5    |
| C45-C46-H46A  | 108.6    | H53A-C53-H53B | 109.5    |
| C47-C46-H46B  | 108.6    | C41-C53-H53C  | 109.5    |
| C45-C46-H46B  | 108.6    | H53A-C53-H53C | 109.5    |
| H46A-C46-H46B | 107.6    | H53B-C53-H53C | 109.5    |
| C48-C47-C56   | 119.8(6) | C41-C54-H54A  | 109.5    |
| C48-C47-C46   | 122.6(6) | C41-C54-H54B  | 109.5    |
| C56-C47-C46   | 117.6(6) | H54A-C54-H54B | 109.5    |
| C47-C48-C58   | 121.1(6) | C41-C54-H54C  | 109.5    |
| C47-C48-C49   | 123.9(6) | H54A-C54-H54C | 109.5    |
| C58-C48-C49   | 114.4(5) | H54B-C54-H54C | 109.5    |
| C48-C49-C60   | 105.3(6) | C43-C55-H55A  | 109.5    |
| C48-C49-C50   | 113.8(6) | C43-C55-H55B  | 109.5    |
| C60-C49-C50   | 107.4(6) | H55A-C55-H55B | 109.5    |
| C48-C49-C44   | 110.4(5) | C43-C55-H55C  | 109.5    |
| C60-C49-C44   | 109.8(6) | H55A-C55-H55C | 109.5    |
| C50-C49-C44   | 110.0(6) | H55B-C55-H55C | 109.5    |
| C51-C50-C49   | 114.6(6) | O17-C56-O18   | 123.1(6) |
| C51-C50-H50A  | 108.6    | O17-C56-C47   | 125.9(6) |
| C49-C50-H50A  | 108.6    | O18-C56-C47   | 111.0(5) |
| C51-C50-H50B  | 108.6    | O18-C57-H57A  | 109.5    |
| C49-C50-H50B  | 108.6    | O18-C57-H57B  | 109.5    |
| H50A-C50-H50B | 107.6    | H57A-C57-H57B | 109.5    |
| C52-C51-C50   | 110.1(6) | O18-C57-H57C  | 109.5    |
| C52-C51-H51A  | 109.6    | H57A-C57-H57C | 109.5    |
| C50-C51-H51A  | 109.6    | H57B-C57-H57C | 109.5    |
| C52-C51-H51B  | 109.6    | O15-C58-O16   | 123.0(7) |
| C50-C51-H51B  | 109.6    | O15-C58-C48   | 126.2(6) |
| H51A-C51-H51B | 108.2    | O16-C58-C48   | 110.6(6) |

|               |       |               |       |
|---------------|-------|---------------|-------|
| O16-C59-H59A  | 109.5 | C49-C60-H60A  | 109.5 |
| O16-C59-H59B  | 109.5 | C49-C60-H60B  | 109.5 |
| H59A-C59-H59B | 109.5 | H60A-C60-H60B | 109.5 |
| O16-C59-H59C  | 109.5 | C49-C60-H60C  | 109.5 |
| H59A-C59-H59C | 109.5 | H60A-C60-H60C | 109.5 |
| H59B-C59-H59C | 109.5 | H60B-C60-H60C | 109.5 |

---

**Table S8.** Anisotropic displacement parameters ( $\text{\AA}^2 \times 10^3$ ) for **9**. The anisotropic displacement factor exponent takes the form:  $-2\pi^2 [ h^2 a^{*2} U^{11} + \dots + 2 h k a^* b^* U^{12} ]$

|     | U11   | U22   | U33   | U23    | U13    | U12    |
|-----|-------|-------|-------|--------|--------|--------|
| O1  | 21(3) | 30(3) | 26(3) | 6(2)   | 5(2)   | -1(2)  |
| O2  | 15(3) | 42(3) | 19(3) | -1(2)  | 1(2)   | -2(2)  |
| O3  | 24(3) | 27(3) | 22(3) | -6(2)  | 2(2)   | 1(2)   |
| O4  | 31(3) | 21(3) | 18(3) | 0(2)   | 5(2)   | -3(2)  |
| O5  | 18(3) | 41(3) | 25(3) | 4(3)   | 0(2)   | -5(2)  |
| O6  | 21(3) | 37(3) | 23(3) | 3(2)   | -5(2)  | -3(2)  |
| C1  | 13(4) | 35(4) | 26(4) | -2(3)  | 4(3)   | 0(3)   |
| C2  | 16(4) | 31(4) | 20(3) | 4(3)   | 4(3)   | 0(3)   |
| C3  | 16(4) | 47(5) | 24(4) | 17(4)  | 0(3)   | -1(4)  |
| C4  | 16(4) | 60(5) | 15(4) | -3(4)  | -1(3)  | -2(4)  |
| C5  | 13(3) | 29(4) | 22(4) | -5(3)  | -2(3)  | -5(3)  |
| C6  | 17(4) | 17(3) | 20(3) | -5(3)  | -1(3)  | 0(3)   |
| C7  | 11(3) | 16(3) | 26(4) | -1(3)  | 1(3)   | -4(3)  |
| C8  | 21(4) | 24(4) | 24(4) | 7(3)   | -1(3)  | 0(3)   |
| C9  | 19(4) | 24(4) | 33(4) | 10(3)  | 0(3)   | -3(3)  |
| C10 | 13(4) | 26(4) | 23(4) | 2(3)   | -1(3)  | -4(3)  |
| C11 | 19(4) | 19(4) | 19(4) | -3(3)  | -2(3)  | -2(3)  |
| C12 | 22(4) | 37(4) | 14(3) | 5(3)   | 4(3)   | 2(3)   |
| C13 | 20(4) | 43(5) | 23(4) | 7(3)   | 6(3)   | 2(4)   |
| C14 | 20(4) | 55(5) | 42(5) | -12(4) | 5(4)   | -1(4)  |
| C15 | 26(5) | 42(5) | 48(5) | -28(4) | 16(4)  | -11(4) |
| C16 | 16(4) | 16(3) | 18(3) | -1(3)  | -2(3)  | -2(3)  |
| C17 | 37(5) | 33(4) | 29(5) | -2(3)  | 13(4)  | -11(4) |
| C18 | 17(4) | 20(4) | 23(4) | 1(3)   | -4(3)  | 1(3)   |
| C19 | 22(4) | 36(4) | 29(4) | -1(4)  | -10(3) | 3(4)   |
| C20 | 25(4) | 32(4) | 21(4) | -7(3)  | -5(3)  | 1(3)   |
| O7  | 16(3) | 46(3) | 17(3) | 3(2)   | 3(2)   | 0(2)   |
| O8  | 20(3) | 31(3) | 28(3) | 6(2)   | 2(2)   | -4(2)  |
| O9  | 23(3) | 29(3) | 24(3) | -7(2)  | 5(2)   | 5(2)   |
| O10 | 25(3) | 18(3) | 19(3) | -3(2)  | 5(2)   | -4(2)  |
| O11 | 17(3) | 43(3) | 23(3) | 3(3)   | 1(2)   | -3(2)  |

|     |       |       |       |        |       |        |
|-----|-------|-------|-------|--------|-------|--------|
| O12 | 20(3) | 42(3) | 18(2) | 4(2)   | -4(2) | -2(2)  |
| C21 | 14(4) | 43(5) | 22(4) | 2(3)   | 5(3)  | 0(4)   |
| C22 | 14(4) | 32(4) | 24(4) | 2(3)   | 4(3)  | -4(3)  |
| C23 | 23(4) | 47(5) | 19(4) | 19(4)  | 0(3)  | -3(4)  |
| C24 | 17(4) | 68(6) | 17(4) | -1(4)  | 0(3)  | -1(4)  |
| C25 | 23(4) | 26(4) | 21(4) | -6(3)  | -1(3) | -1(3)  |
| C26 | 17(4) | 14(3) | 21(3) | -4(3)  | 0(3)  | 1(3)   |
| C27 | 18(4) | 15(3) | 22(4) | -1(3)  | 0(3)  | 0(3)   |
| C28 | 20(4) | 24(4) | 26(4) | 9(3)   | 2(3)  | 1(3)   |
| C29 | 23(4) | 20(4) | 35(5) | 6(3)   | 5(3)  | -1(3)  |
| C30 | 16(3) | 22(4) | 21(3) | -6(3)  | 10(3) | -7(3)  |
| C31 | 14(4) | 21(4) | 21(4) | 2(3)   | 5(3)  | 1(3)   |
| C32 | 25(4) | 31(4) | 16(3) | 2(3)   | 2(3)  | 3(3)   |
| C33 | 25(4) | 44(5) | 25(4) | 7(4)   | 4(3)  | 3(4)   |
| C34 | 21(4) | 58(6) | 38(5) | -15(4) | 3(4)  | -11(4) |
| C35 | 27(5) | 38(5) | 53(6) | -25(4) | 7(4)  | -12(4) |
| C36 | 14(4) | 25(4) | 17(3) | -1(3)  | -2(3) | 1(3)   |
| C37 | 43(5) | 25(4) | 22(4) | 2(3)   | 14(4) | -5(4)  |
| C38 | 24(4) | 17(3) | 19(3) | 0(3)   | -1(3) | 1(3)   |
| C39 | 20(4) | 40(5) | 22(4) | 2(3)   | -6(3) | 1(3)   |
| C40 | 29(4) | 23(4) | 27(4) | -6(3)  | -3(3) | 7(3)   |
| O13 | 14(3) | 45(3) | 16(3) | -2(2)  | -1(2) | 3(2)   |
| O14 | 21(3) | 30(3) | 29(3) | -2(2)  | 5(2)  | 1(2)   |
| O15 | 28(3) | 26(2) | 21(3) | 7(2)   | 6(2)  | -5(2)  |
| O16 | 24(3) | 23(3) | 18(2) | 2(2)   | 6(2)  | 5(2)   |
| O17 | 17(3) | 41(3) | 27(3) | -4(2)  | -1(2) | 4(2)   |
| O18 | 18(3) | 40(3) | 22(3) | -5(2)  | -3(2) | 3(2)   |
| C41 | 21(4) | 40(5) | 20(4) | -3(3)  | 1(3)  | 3(4)   |
| C42 | 22(4) | 30(4) | 22(4) | -3(3)  | -3(3) | -2(3)  |
| C43 | 18(4) | 28(4) | 11(3) | -6(3)  | -1(3) | -1(3)  |
| C44 | 20(4) | 20(4) | 21(4) | 2(3)   | -8(3) | 1(3)   |
| C45 | 22(4) | 22(4) | 32(4) | -7(3)  | 1(3)  | 4(3)   |
| C46 | 21(4) | 25(4) | 26(4) | -9(3)  | 1(3)  | 1(3)   |
| C47 | 18(4) | 19(3) | 19(3) | -1(3)  | -2(3) | -1(3)  |
| C48 | 17(4) | 19(3) | 17(3) | 0(3)   | 5(3)  | 1(3)   |
| C49 | 15(4) | 31(4) | 20(4) | 10(3)  | 2(3)  | 5(3)   |

|     |       |       |       |        |       |        |
|-----|-------|-------|-------|--------|-------|--------|
| C50 | 16(4) | 63(5) | 13(3) | 4(4)   | 1(3)  | 1(4)   |
| C51 | 16(4) | 53(6) | 27(4) | -12(4) | 0(3)  | -3(4)  |
| C52 | 19(4) | 28(4) | 19(3) | -12(3) | -8(3) | 1(3)   |
| C53 | 19(4) | 39(5) | 31(4) | -6(4)  | 4(3)  | -10(3) |
| C54 | 13(4) | 63(6) | 42(5) | 17(4)  | 3(3)  | 8(4)   |
| C55 | 26(4) | 25(4) | 27(4) | 4(3)   | -1(3) | 0(3)   |
| C56 | 19(4) | 18(4) | 20(3) | -1(3)  | -2(3) | -2(3)  |
| C57 | 21(4) | 38(4) | 25(4) | -1(3)  | -7(3) | 1(4)   |
| C58 | 16(4) | 23(4) | 18(4) | 4(3)   | -2(3) | -3(3)  |
| C59 | 36(5) | 32(5) | 26(4) | -4(3)  | 10(4) | 6(4)   |
| C60 | 31(5) | 42(5) | 49(6) | 27(4)  | 9(4)  | 14(4)  |

---



**Table S9.** Hydrogen coordinates ( $\times 10^4$ ) and isotropic displacement parameters ( $\text{\AA}^2 \times 10^3$ ) for **9**.

|      | x     | y     | z    | U(eq) |
|------|-------|-------|------|-------|
| H2   | 4869  | 2335  | 983  | 27    |
| H3A  | 6598  | 2158  | 530  | 35    |
| H3B  | 5676  | 2083  | 25   | 35    |
| H4A  | 7003  | 473   | -125 | 36    |
| H4B  | 5832  | -139  | -21  | 36    |
| H8A  | 7665  | -197  | 2257 | 28    |
| H8B  | 8129  | -1577 | 2098 | 28    |
| H9A  | 6105  | -1184 | 2098 | 30    |
| H9B  | 6622  | -2184 | 1642 | 30    |
| H10  | 5462  | -1086 | 1077 | 25    |
| H12A | 4759  | -13   | 2143 | 29    |
| H12B | 4255  | 1327  | 1944 | 29    |
| H13A | 2180  | 1539  | 1414 | 43    |
| H13B | 2389  | 2075  | 754  | 43    |
| H13C | 3238  | 2372  | 1278 | 43    |
| H14A | 3064  | -1173 | 538  | 58    |
| H14B | 2449  | 2     | 233  | 58    |
| H14C | 2007  | -581  | 847  | 58    |
| H15A | 7568  | -1792 | 98   | 58    |
| H15B | 6365  | -2175 | 296  | 58    |
| H15C | 7358  | -2379 | 748  | 58    |
| H17A | 10252 | 2136  | 110  | 49    |
| H17B | 9487  | 3366  | 144  | 49    |
| H17C | 9255  | 2282  | -344 | 49    |
| H19A | 11326 | -433  | 2191 | 43    |
| H19B | 10889 | 190   | 2797 | 43    |
| H19C | 11074 | 1061  | 2219 | 43    |
| H20A | 6970  | 1804  | 1536 | 40    |
| H20B | 6480  | 1261  | 2147 | 40    |
| H20C | 5936  | 2472  | 1833 | 40    |
| H22  | 11538 | 2328  | 4318 | 28    |

|      |       |       |      |    |
|------|-------|-------|------|----|
| H23A | 12348 | 2075  | 3357 | 35 |
| H23B | 13274 | 2143  | 3860 | 35 |
| H24A | 13651 | 471   | 3205 | 40 |
| H24B | 12480 | -133  | 3320 | 40 |
| H28A | 14326 | -213  | 5595 | 28 |
| H28B | 14787 | -1591 | 5428 | 28 |
| H29A | 13283 | -2178 | 4965 | 31 |
| H29B | 12765 | -1189 | 5426 | 31 |
| H30  | 12132 | -1086 | 4418 | 24 |
| H32A | 11438 | -9    | 5474 | 29 |
| H32B | 10938 | 1334  | 5278 | 29 |
| H33A | 8720  | 1509  | 4652 | 47 |
| H33B | 9230  | 2219  | 4085 | 47 |
| H33C | 9843  | 2261  | 4716 | 47 |
| H34A | 9737  | -1177 | 3865 | 58 |
| H34B | 9093  | -17   | 3565 | 58 |
| H34C | 8678  | -614  | 4183 | 58 |
| H35A | 14258 | -1786 | 3434 | 59 |
| H35B | 13049 | -2176 | 3619 | 59 |
| H35C | 14028 | -2387 | 4080 | 59 |
| H37A | 16849 | 1940  | 3361 | 45 |
| H37B | 16349 | 3285  | 3556 | 45 |
| H37C | 15813 | 2499  | 3018 | 45 |
| H39A | 17997 | -365  | 5480 | 41 |
| H39B | 17577 | 91    | 6122 | 41 |
| H39C | 17697 | 1100  | 5590 | 41 |
| H40A | 13642 | 1784  | 4865 | 40 |
| H40B | 13147 | 1239  | 5475 | 40 |
| H40C | 12609 | 2457  | 5161 | 40 |
| H42A | 11905 | 4992  | 1183 | 29 |
| H42B | 12397 | 6336  | 1387 | 29 |
| H44  | 11205 | 3933  | 2262 | 24 |
| H45A | 10571 | 3792  | 1243 | 30 |
| H45B | 10037 | 2814  | 1703 | 30 |
| H46A | 9026  | 4808  | 1076 | 29 |
| H46B | 8551  | 3429  | 1227 | 29 |

|      |       |      |      |    |
|------|-------|------|------|----|
| H50A | 9686  | 5469 | 3465 | 37 |
| H50B | 10856 | 4866 | 3347 | 37 |
| H51A | 10064 | 7151 | 2800 | 38 |
| H51B | 10977 | 7095 | 3311 | 38 |
| H52  | 11794 | 7342 | 2367 | 26 |
| H53A | 13513 | 7253 | 1935 | 44 |
| H53B | 14631 | 6505 | 2028 | 44 |
| H53C | 14087 | 7243 | 2577 | 44 |
| H54A | 14225 | 4984 | 3114 | 59 |
| H54B | 14658 | 4387 | 2501 | 59 |
| H54C | 13590 | 3824 | 2809 | 59 |
| H55A | 9694  | 6792 | 1789 | 39 |
| H55B | 10208 | 6268 | 1180 | 39 |
| H55C | 10744 | 7465 | 1511 | 39 |
| H57A | 5335  | 4633 | 1191 | 42 |
| H57B | 5753  | 5073 | 546  | 42 |
| H57C | 5629  | 6097 | 1072 | 42 |
| H59A | 6422  | 7104 | 3233 | 47 |
| H59B | 7157  | 8356 | 3180 | 47 |
| H59C | 7434  | 7299 | 3673 | 47 |
| H60A | 10292 | 2838 | 3048 | 61 |
| H60B | 9315  | 2625 | 2587 | 61 |
| H60C | 9082  | 3218 | 3234 | 61 |

---

**Table S10.** Torsion angles [°] for **9**.

|               |           |                |           |
|---------------|-----------|----------------|-----------|
| C12-O1-C1-O2  | 55.5(7)   | C15-C5-C10-C11 | -162.6(6) |
| C12-O1-C1-C14 | 169.3(5)  | O2-C2-C11-C12  | -53.1(7)  |
| C12-O1-C1-C13 | -69.2(7)  | C3-C2-C11-C12  | -171.4(6) |
| C2-O2-C1-O1   | -54.8(7)  | O2-C2-C11-C20  | -168.0(5) |
| C2-O2-C1-C14  | -169.2(6) | C3-C2-C11-C20  | 73.7(7)   |
| C2-O2-C1-C13  | 70.5(7)   | O2-C2-C11-C10  | 65.6(7)   |
| C1-O2-C2-C11  | 56.1(7)   | C3-C2-C11-C10  | -52.7(8)  |
| C1-O2-C2-C3   | 178.9(5)  | C9-C10-C11-C2  | 175.7(5)  |
| O2-C2-C3-C4   | -63.9(7)  | C5-C10-C11-C2  | 46.9(8)   |
| C11-C2-C3-C4  | 57.7(8)   | C9-C10-C11-C12 | -67.8(7)  |
| C2-C3-C4-C5   | -56.1(8)  | C5-C10-C11-C12 | 163.4(5)  |
| C3-C4-C5-C6   | -76.5(7)  | C9-C10-C11-C20 | 52.4(7)   |
| C3-C4-C5-C15  | 168.5(6)  | C5-C10-C11-C20 | -76.4(7)  |
| C3-C4-C5-C10  | 49.1(8)   | C1-O1-C12-C11  | -58.1(8)  |
| C4-C5-C6-C7   | 154.8(6)  | C2-C11-C12-O1  | 54.8(7)   |
| C15-C5-C6-C7  | -88.9(8)  | C20-C11-C12-O1 | 170.8(5)  |
| C10-C5-C6-C7  | 29.8(9)   | C10-C11-C12-O1 | -64.8(7)  |
| C4-C5-C6-C16  | -32.0(8)  | C17-O4-C16-O3  | -8.0(10)  |
| C15-C5-C6-C16 | 84.3(7)   | C17-O4-C16-C6  | 177.5(6)  |
| C10-C5-C6-C16 | -157.0(5) | C7-C6-C16-O3   | 107.0(8)  |
| C16-C6-C7-C8  | 179.9(6)  | C5-C6-C16-O3   | -66.1(9)  |
| C5-C6-C7-C8   | -7.3(10)  | C7-C6-C16-O4   | -78.5(8)  |
| C16-C6-C7-C18 | -0.4(10)  | C5-C6-C16-O4   | 108.3(6)  |
| C5-C6-C7-C18  | 172.4(6)  | C19-O6-C18-O5  | -0.9(10)  |
| C6-C7-C8-C9   | 5.8(10)   | C19-O6-C18-C7  | 177.9(5)  |
| C18-C7-C8-C9  | -174.0(5) | C6-C7-C18-O5   | -12.5(10) |
| C7-C8-C9-C10  | -28.1(9)  | C8-C7-C18-O5   | 167.2(7)  |
| C8-C9-C10-C5  | 50.1(8)   | C6-C7-C18-O6   | 168.7(6)  |
| C8-C9-C10-C11 | -81.7(7)  | C8-C7-C18-O6   | -11.6(8)  |
| C6-C5-C10-C9  | -49.1(7)  | C32-O8-C21-O7  | 54.1(8)   |
| C4-C5-C10-C9  | -175.1(6) | C32-O8-C21-C34 | 168.0(5)  |
| C15-C5-C10-C9 | 66.9(7)   | C32-O8-C21-C33 | -69.8(7)  |
| C6-C5-C10-C11 | 81.4(7)   | C22-O7-C21-O8  | -54.3(8)  |
| C4-C5-C10-C11 | -44.5(8)  | C22-O7-C21-C34 | -168.2(6) |

|                 |           |                 |           |
|-----------------|-----------|-----------------|-----------|
| C22-O7-C21-C33  | 69.3(8)   | C29-C30-C31-C22 | 176.6(6)  |
| C21-O7-C22-C31  | 57.3(7)   | C25-C30-C31-C22 | 47.7(8)   |
| C21-O7-C22-C23  | 179.6(6)  | C29-C30-C31-C40 | 51.3(7)   |
| O7-C22-C23-C24  | -63.7(7)  | C25-C30-C31-C40 | -77.6(7)  |
| C31-C22-C23-C24 | 58.5(8)   | C29-C30-C31-C32 | -68.0(7)  |
| C22-C23-C24-C25 | -56.8(8)  | C25-C30-C31-C32 | 163.1(6)  |
| C23-C24-C25-C26 | -76.7(7)  | C21-O8-C32-C31  | -57.3(7)  |
| C23-C24-C25-C30 | 50.6(8)   | C22-C31-C32-O8  | 54.0(7)   |
| C23-C24-C25-C35 | 169.8(6)  | C40-C31-C32-O8  | 170.8(5)  |
| C24-C25-C26-C27 | 154.7(6)  | C30-C31-C32-O8  | -65.6(7)  |
| C30-C25-C26-C27 | 27.8(9)   | C37-O10-C36-O9  | -8.3(10)  |
| C35-C25-C26-C27 | -90.2(8)  | C37-O10-C36-C26 | 176.6(6)  |
| C24-C25-C26-C36 | -30.6(8)  | C27-C26-C36-O9  | 107.3(8)  |
| C30-C25-C26-C36 | -157.5(5) | C25-C26-C36-O9  | -67.4(9)  |
| C35-C25-C26-C36 | 84.5(7)   | C27-C26-C36-O10 | -77.7(8)  |
| C36-C26-C27-C38 | -1.1(10)  | C25-C26-C36-O10 | 107.6(6)  |
| C25-C26-C27-C38 | 173.2(6)  | C39-O12-C38-O11 | 0.8(10)   |
| C36-C26-C27-C28 | -179.9(6) | C39-O12-C38-C27 | 178.4(5)  |
| C25-C26-C27-C28 | -5.5(10)  | C26-C27-C38-O11 | -13.1(11) |
| C26-C27-C28-C29 | 4.7(9)    | C28-C27-C38-O11 | 165.8(7)  |
| C38-C27-C28-C29 | -174.1(6) | C26-C27-C38-O12 | 169.4(6)  |
| C27-C28-C29-C30 | -28.1(8)  | C28-C27-C38-O12 | -11.7(8)  |
| C28-C29-C30-C25 | 50.0(8)   | C52-O13-C41-O14 | -56.6(7)  |
| C28-C29-C30-C31 | -80.6(7)  | C52-O13-C41-C54 | -169.4(6) |
| C26-C25-C30-C29 | -48.3(7)  | C52-O13-C41-C53 | 68.3(8)   |
| C24-C25-C30-C29 | -176.2(6) | C42-O14-C41-O13 | 56.1(7)   |
| C35-C25-C30-C29 | 66.3(7)   | C42-O14-C41-C54 | 168.1(5)  |
| C26-C25-C30-C31 | 82.8(7)   | C42-O14-C41-C53 | -69.6(7)  |
| C24-C25-C30-C31 | -45.2(8)  | C41-O14-C42-C43 | -58.9(7)  |
| C35-C25-C30-C31 | -162.6(6) | O14-C42-C43-C55 | 169.7(5)  |
| O7-C22-C31-C40  | -168.2(5) | O14-C42-C43-C44 | -63.7(7)  |
| C23-C22-C31-C40 | 73.8(7)   | O14-C42-C43-C52 | 54.6(7)   |
| O7-C22-C31-C32  | -53.2(7)  | C55-C43-C44-C45 | 52.9(8)   |
| C23-C22-C31-C32 | -171.2(6) | C42-C43-C44-C45 | -68.0(7)  |
| O7-C22-C31-C30  | 64.2(7)   | C52-C43-C44-C45 | 176.6(6)  |
| C23-C22-C31-C30 | -53.8(8)  | C55-C43-C44-C49 | -76.0(7)  |

|                 |           |                 |           |
|-----------------|-----------|-----------------|-----------|
| C42-C43-C44-C49 | 163.1(6)  | C44-C49-C50-C51 | 50.1(8)   |
| C52-C43-C44-C49 | 47.7(8)   | C49-C50-C51-C52 | -58.0(8)  |
| C43-C44-C45-C46 | -80.4(8)  | C41-O13-C52-C51 | 179.9(6)  |
| C49-C44-C45-C46 | 51.6(8)   | C41-O13-C52-C43 | 57.6(7)   |
| C44-C45-C46-C47 | -29.5(9)  | C50-C51-C52-O13 | -62.3(7)  |
| C45-C46-C47-C48 | 7.0(10)   | C50-C51-C52-C43 | 58.9(8)   |
| C45-C46-C47-C56 | -172.9(5) | C55-C43-C52-O13 | -166.3(5) |
| C56-C47-C48-C58 | 0.1(10)   | C44-C43-C52-O13 | 65.6(7)   |
| C46-C47-C48-C58 | -179.7(6) | C42-C43-C52-O13 | -52.9(7)  |
| C56-C47-C48-C49 | 171.4(6)  | C55-C43-C52-C51 | 74.4(7)   |
| C46-C47-C48-C49 | -8.5(11)  | C44-C43-C52-C51 | -53.7(8)  |
| C47-C48-C49-C60 | -87.9(8)  | C42-C43-C52-C51 | -172.2(6) |
| C58-C48-C49-C60 | 83.9(7)   | C57-O18-C56-O17 | -1.4(10)  |
| C47-C48-C49-C50 | 154.8(7)  | C57-O18-C56-C47 | 178.0(5)  |
| C58-C48-C49-C50 | -33.4(8)  | C48-C47-C56-O17 | -12.3(11) |
| C47-C48-C49-C44 | 30.6(9)   | C46-C47-C56-O17 | 167.6(7)  |
| C58-C48-C49-C44 | -157.6(6) | C48-C47-C56-O18 | 168.3(6)  |
| C45-C44-C49-C48 | -49.7(7)  | C46-C47-C56-O18 | -11.8(8)  |
| C43-C44-C49-C48 | 80.7(7)   | C59-O16-C58-O15 | -7.6(10)  |
| C45-C44-C49-C60 | 66.0(7)   | C59-O16-C58-C48 | 177.6(5)  |
| C43-C44-C49-C60 | -163.7(6) | C47-C48-C58-O15 | 106.6(8)  |
| C45-C44-C49-C50 | -176.1(6) | C49-C48-C58-O15 | -65.5(9)  |
| C43-C44-C49-C50 | -45.7(8)  | C47-C48-C58-O16 | -78.9(8)  |
| C48-C49-C50-C51 | -74.4(8)  | C49-C48-C58-O16 | 109.1(6)  |
| C60-C49-C50-C51 | 169.5(6)  |                 |           |

**Figure S1.** View of molecule 1 of **9** showing the atom labeling scheme. Displacement ellipsoids are scaled to the 50% probability level.

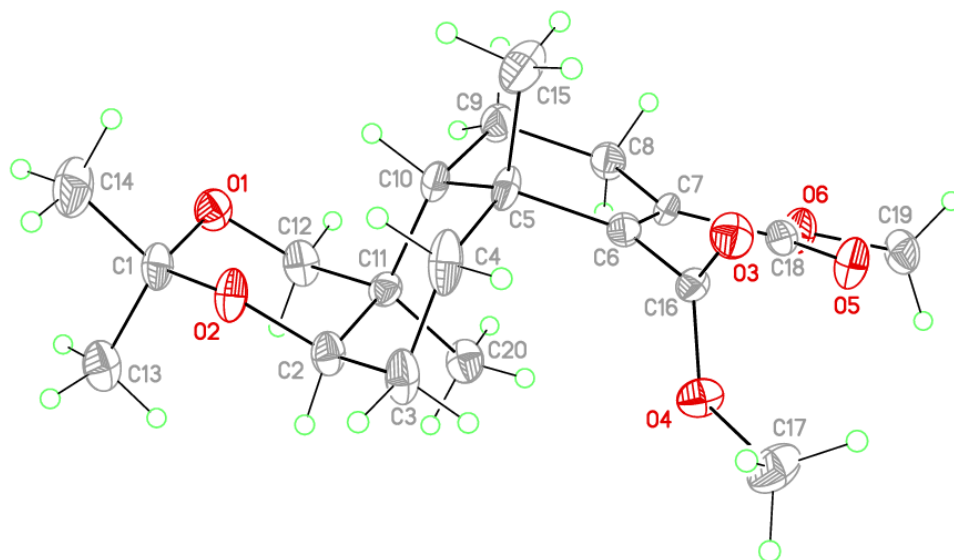

**Figure S2.** View of molecule 2 of **9** showing the atom labeling scheme. Displacement ellipsoids are scaled to the 50% probability level.

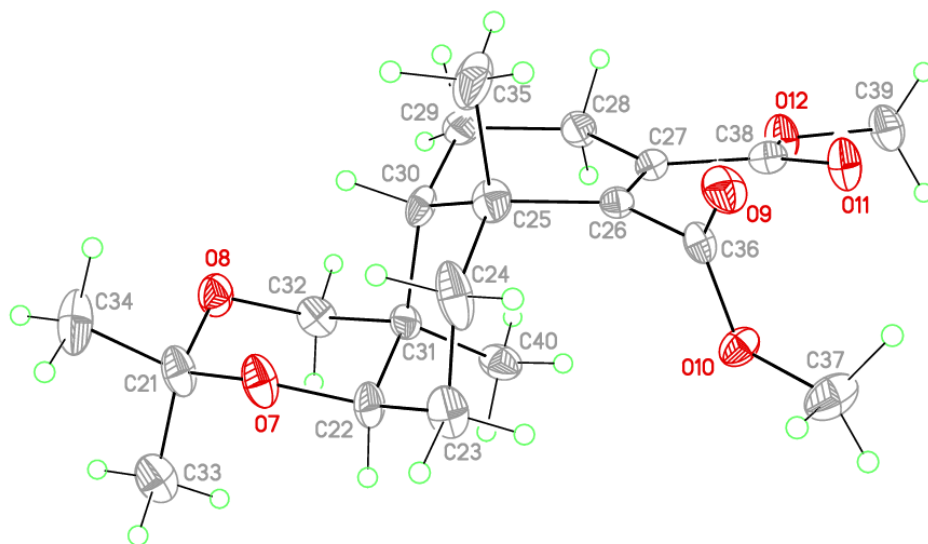



**Figure S3.** View of molecule 3 of **9** showing the atom labeling scheme. Displacement ellipsoids are scaled to the 50% probability level.

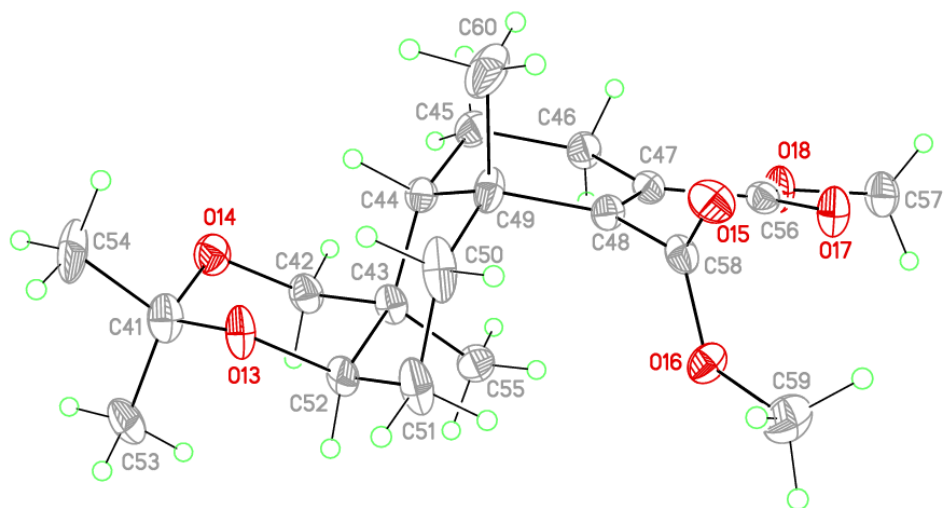

## References

---

- <sup>1</sup> See Supporting Information of: Feng, J.; Garza, V. J.; Krische, M. J. *J. Am. Chem. Soc.* **2014**, *136*, 8911.
- <sup>2</sup> Feng, J.; Noack, F.; Krische, M. J. *J. Am. Chem. Soc.* **2016**, *138*, 12364.
- <sup>3</sup> Myers, A. G.; Zheng, B. *Tetrahedron Lett.* **1996**, *37*, 4841.
- <sup>4</sup> Lipshutz, B. H.; Moretti, R.; Crow, R. *Org. Synth.* **1990**, *69*, 80.
- <sup>5</sup> Mames, A.; Stecko, S.; Mikolajczyk, P.; Soluch, M.; Furmann, B.; Chmielewski, M. *J. Org. Chem.* **2010**, *75*, 7580.
- <sup>6</sup> Xiang, J.; Yuan, R.; Wang, R.; Yi, N.; Lu, L.; Zou, H.; He, W. *J. Org. Chem.* **2014**, *79*, 11378.
- <sup>7</sup> Somarathne, K. K.; McCone, J. A. J.; Brackovic, A.; Rivera, J. L. P.; Fulton, J. R.; Russell, E.; Field, J. J.; Orme, C. L.; Stirrat, H. L.; Riesterer, J.; Teesdale-Spittle, P. H.; Miller, J. H.; Harvey, J. E. *Chem. – Asian J.* **2019**, *14*, 1230.
- <sup>8</sup> Sirion, U.; Kasemsook, S.; Suksen, K.; Piyachaturawat, P.; Suksamrarn, A.; Saeeng, R. *Bioorg. Med. Chem. Lett.* **2012**, *22*, 49.
- <sup>9</sup> Appendino, G.; Ozen, H.; Tagliapietra, S.; Cisero, M. Coumarins from *Heptaptera anisoptera*. *Phytochemistry* **1992**, *31*, 3211.
- <sup>10</sup> CrystalClear 1.40 (2008). Rigaku Americas Corporation, the Woodlands, TX.
- <sup>11</sup> Palatinus, L.; Chapuis, G. *J. Appl. Cryst.* **2007**, *40*, 786.
- <sup>12</sup> Sheldrick, G. M. *Acta Cryst.* **2015**, *C71*, 9.
- <sup>13</sup> Spek, A. L. (1998). PLATON, A Multipurpose Crystallographic Tool. Utrecht University, the Netherlands.
- <sup>14</sup> Farrugia, L. J. *J. Appl. Cryst.* **1999**, *32*, 837.
- <sup>15</sup>  $R_w(F_2) = \{\sum w(|F_o|^2 - |F_c|^2)^2 / \sum w(|F_o|^4)\}^{1/2}$  where  $w$  is the weight given each reflection.  $R(F) = \sum(|F_o| - |F_c|) / \sum|F_o|$  for reflections with  $F_o > 4(\sigma(F_o))$ .  $S = [\sum w(|F_o|^2 - |F_c|^2)^2 / (n - p)]^{1/2}$ , where  $n$  is the number of reflections and  $p$  is the number of refined parameters.
- <sup>16</sup> Wilson, A. J. C. *International Tables for X-ray Crystallography*; Kluwer Academic Press: Boston, 1992, Vol. C, Tables 4.2.6.8 and 6.1.1.4.
- <sup>17</sup> Sheldrick, G. M. (1994). SHELXTL/PC (Version 5.03). Siemens Analytical X-ray Instruments, Inc., Madison, Wisconsin, USA.
